# Supplementary material for: The Therapeutic Efficacy and Mechanism of Action of Gnetin C, a Natural Compound from the Melinjo Plant, in a Preclinical Mouse Model of Advanced Prostate Cancer
Source: MDPI journal article supplement (doi:10.3390/cancers16071344), 2024-03-29
Supplement: s1 [file s1]

## SupplementaryMaterial

“The Therapeutic Efficacy and Mechanism of Action of Gnetin C, a Natural Compound from the Melinjo Plant, in a Preclinical Mouse Model of Advanced Prostate Cancer”

Gisella Campanelli, Ekniel Francois, Prashanth Parupathi, Lakshmi Sirisha Devarakonda, Ching Yang , Avinash Kumar and Anait S. Levenson

Table S1. Antibodies used for western blot and IHC.

| Antibody                 | Application                       | Dilution                   | Source                      | Catalog#   |
|--------------------------|-----------------------------------|----------------------------|-----------------------------|------------|
| AKT                      | WB (cells)                        | 1:1000                     | Cell Signaling Technologies | 4691       |
| p-AKT (Ser473)           | WB (cells)                        | 1:1000                     | Cell Signaling Technologies | 4060       |
| $\beta$ -actin           | WB (tissues)<br>WB (cells)        | 1:2500<br>1:5000           | Santa Cruz Biotechnology    | sc-69879   |
| CD31                     | IHC                               | 1:500                      | Cell Signaling Technologies | 77699      |
| CC3                      | IHC                               | 1:100                      | Cell Signaling Technologies | 9664       |
| Cyclin D1                | WB (tissues)<br>WB (cells)        | 1:1000<br>1:1000           | Cell Signaling Technologies | 2922       |
| HSP70                    | WB (cells)                        | 1:1000                     | Santa Cruz Biotechnology    | sc-24      |
| Ki67                     | IHC                               | 1:200                      | Abcam                       | Ab16667    |
| MTA1                     | WB (tissues)<br>WB (cells)<br>IHC | 1:1000<br>1:2500<br>1:50   | Cell Signaling Technologies | 5647       |
| mTOR                     | WB (cells)                        | 1:1000                     | Cell Signaling Technologies | 2983       |
| p-mTOR (Ser2448)         | WB (cells)                        | 1:1000                     | Cell Signaling Technologies | 5536       |
| p-mTOR (Ser2448)         | IHC                               | 1:100                      | Santa Cruz Biotechnology    | sc-293133  |
| p-4EBP1 (Thr37/46)       | WB (tissues)<br>WB (cells)<br>IHC | 1:1000<br>1:1000<br>1:1000 | Cell Signaling Technologies | 2855       |
| P-p70 S6 kinase (Thr389) | WB (cells)                        | 1:1000                     | Cell Signaling Technologies | 9234       |
| P-p70 S6 kinase (Ser371) | IHC                               | 1:50                       | Invitrogen                  | PA5-104841 |
