# Supplementary material for: The Therapeutic Efficacy and Mechanism of Action of Gnetin C, a Natural Compound from the Melinjo Plant, in a Preclinical Mouse Model of Advanced Prostate Cancer
Source: MDPI journal article supplement (doi:10.3390/cancers16071344), 2024-03-29
Supplement: s1 [file s1]

## Supplementary Information: Original gels

“The Therapeutic Efficacy and Mechanism of Action of Gnetin C, a Natural Compound from the Melinjo Plant, in a Preclinical Mouse Model of Advanced Prostate Cancer”

Gisella Campanelli, Ekniel Francois, Prashanth Parupathi, Lakshmi Sirisha Devarakonda, Ching Yang , Avinash Kumar and Anait S. Levenson

PC3M cells – whole blot images (figure 3a)

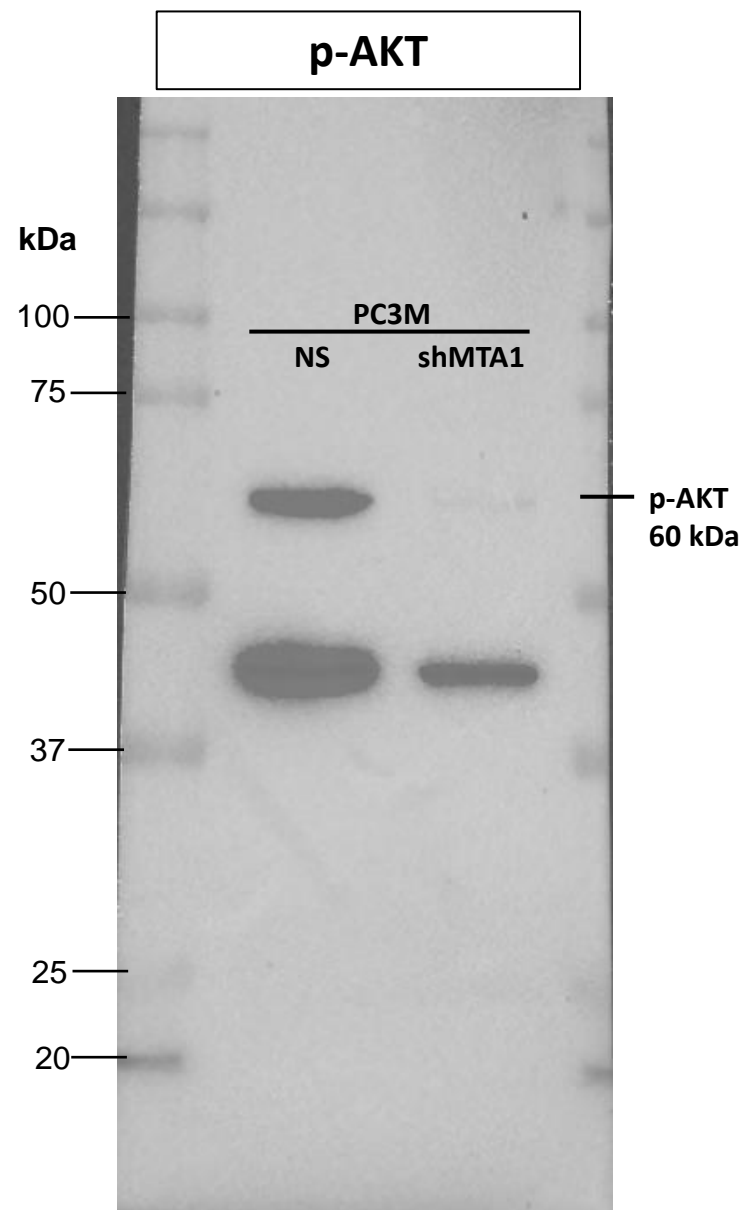

10% polyacrylamide gel

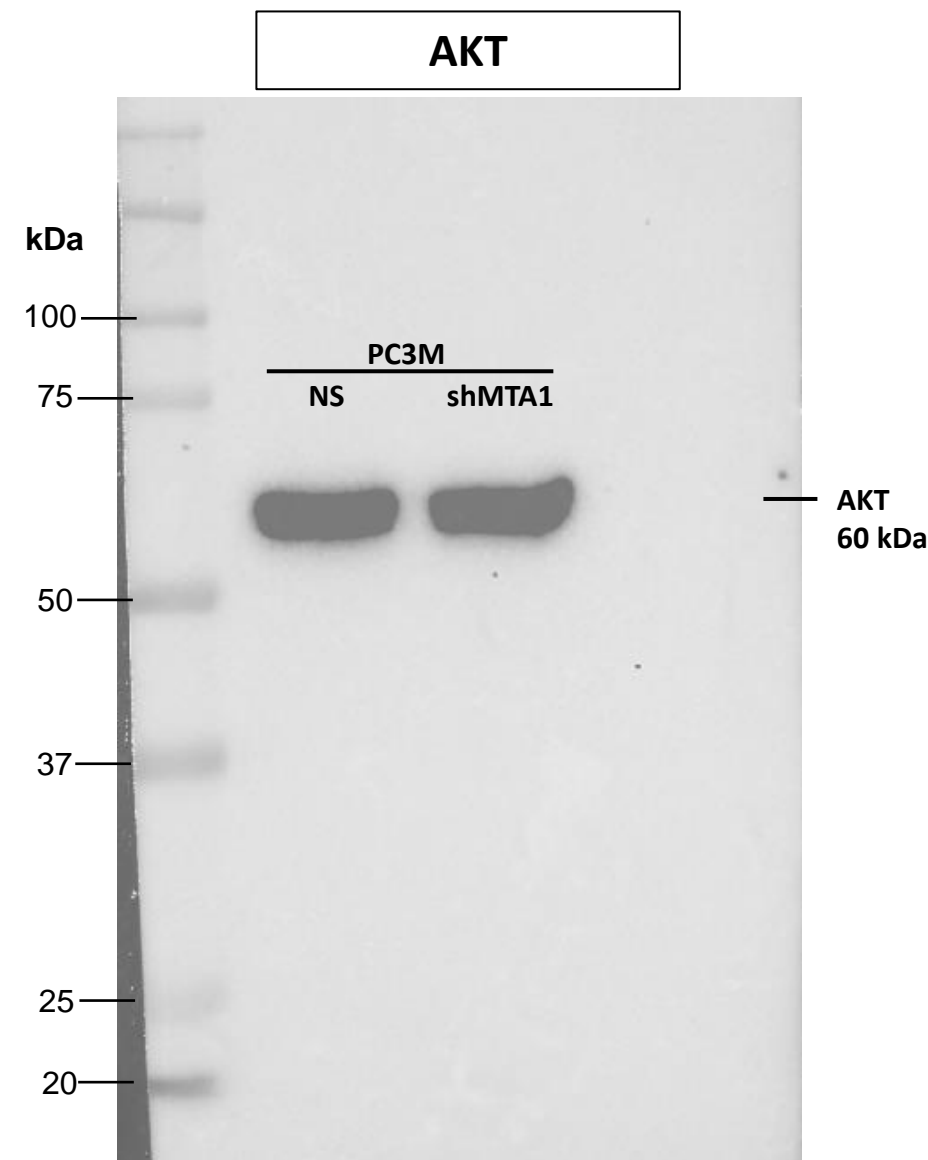

10% polyacrylamide gel

PC3M cells – whole blot images (figure 3a)

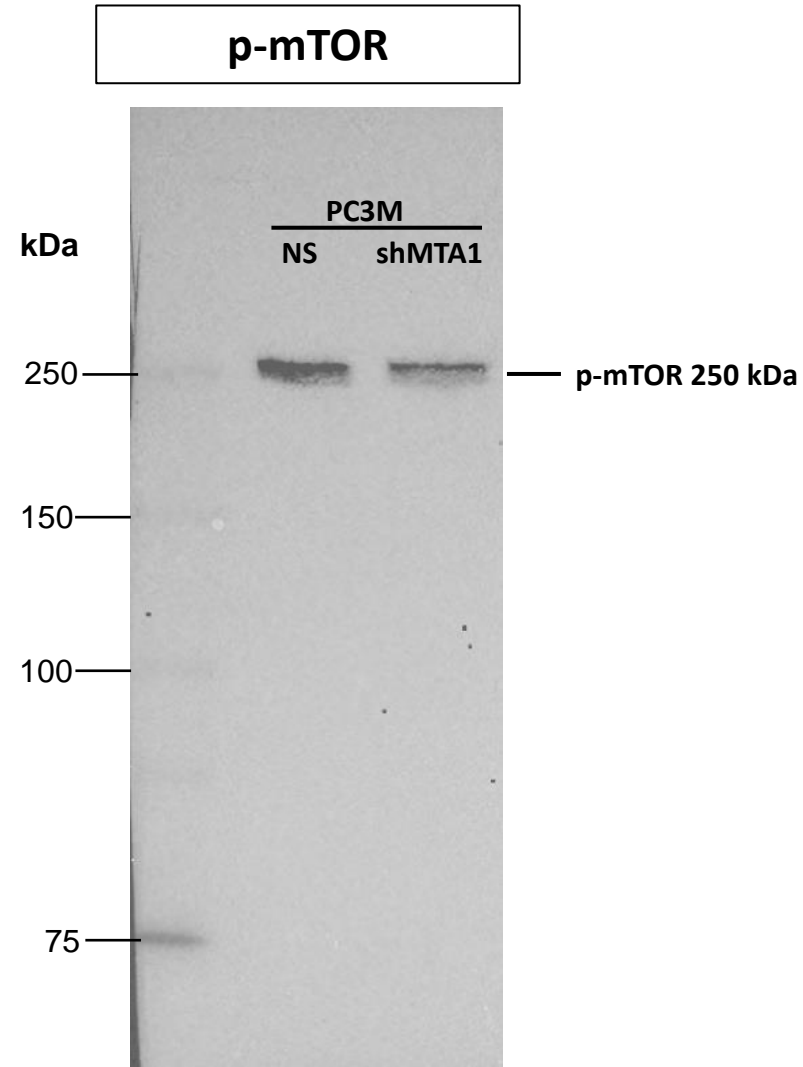

6% polyacrylamide gel

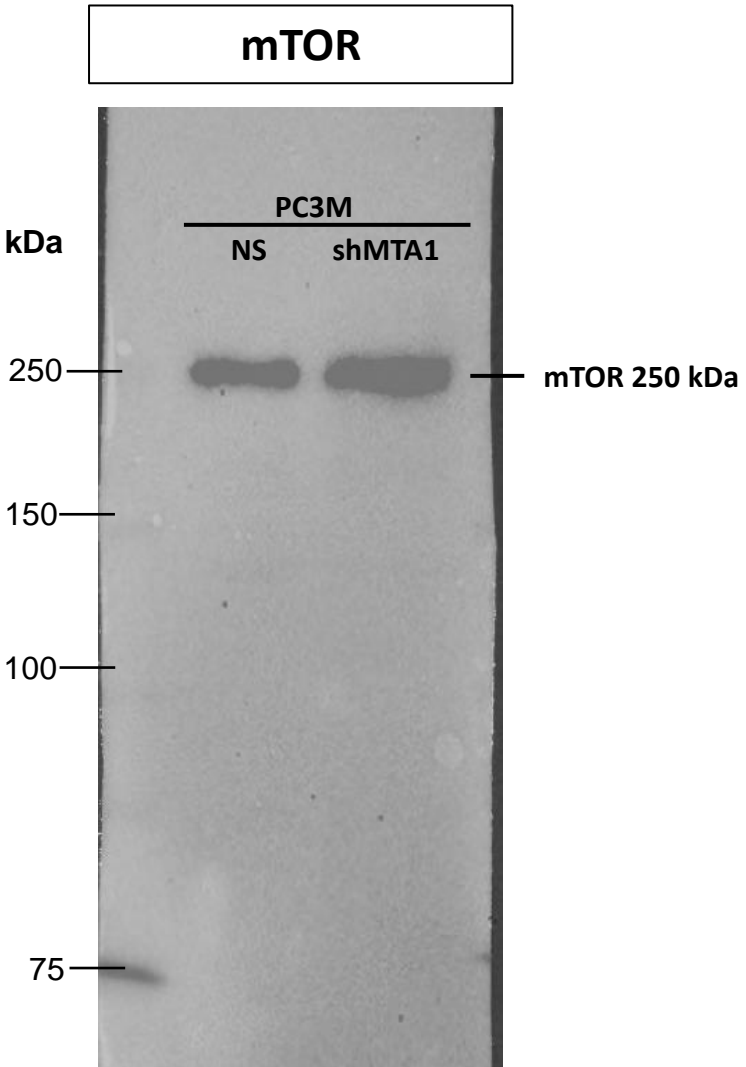

6% polyacrylamide gel

PC3M cells – whole blot images (figure 3a)

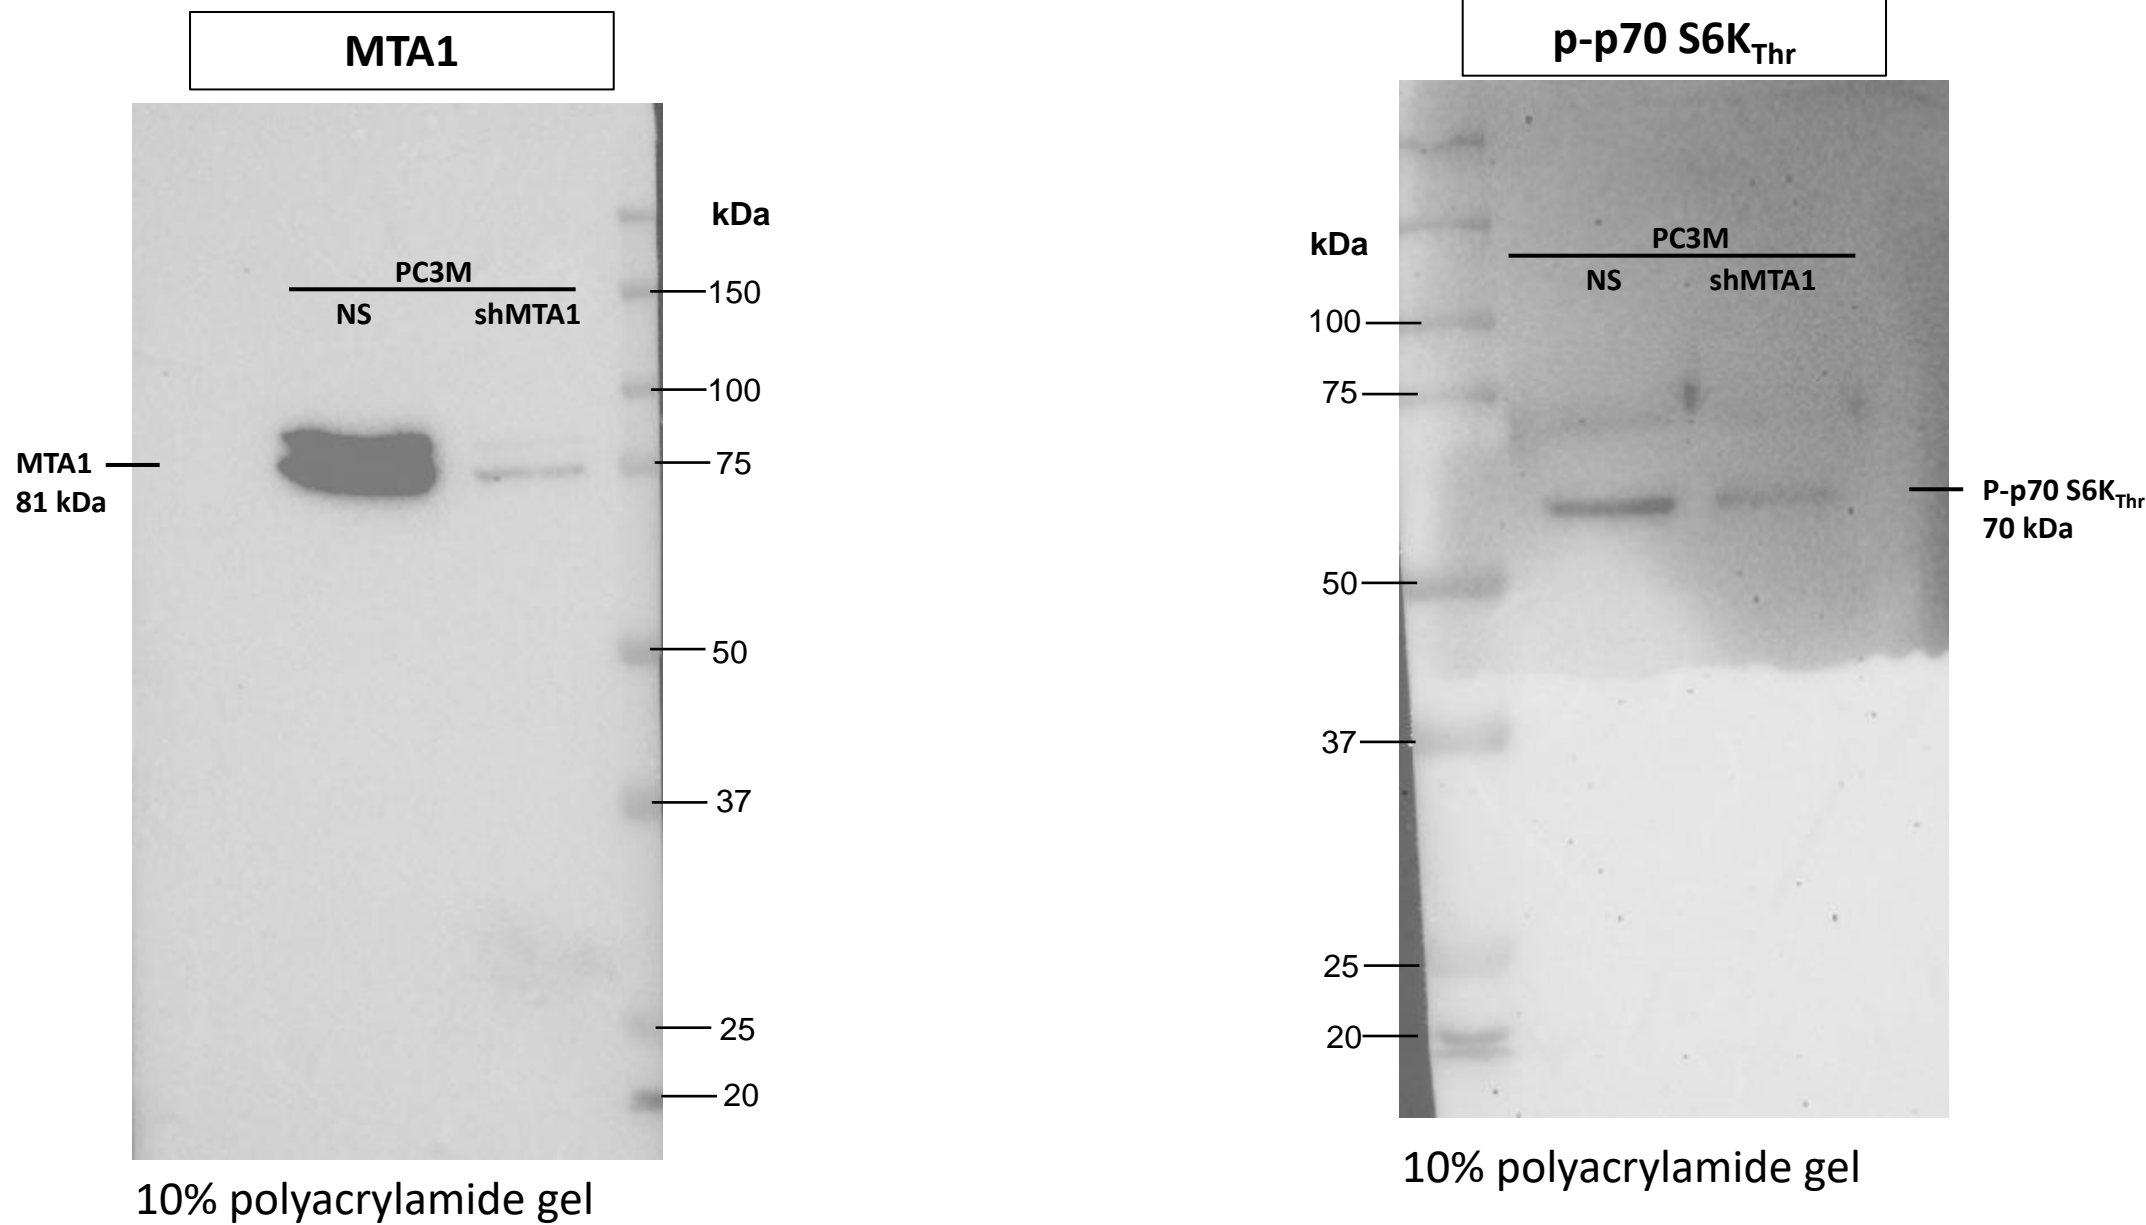

PC3M cells – whole blot images (figure 3a)

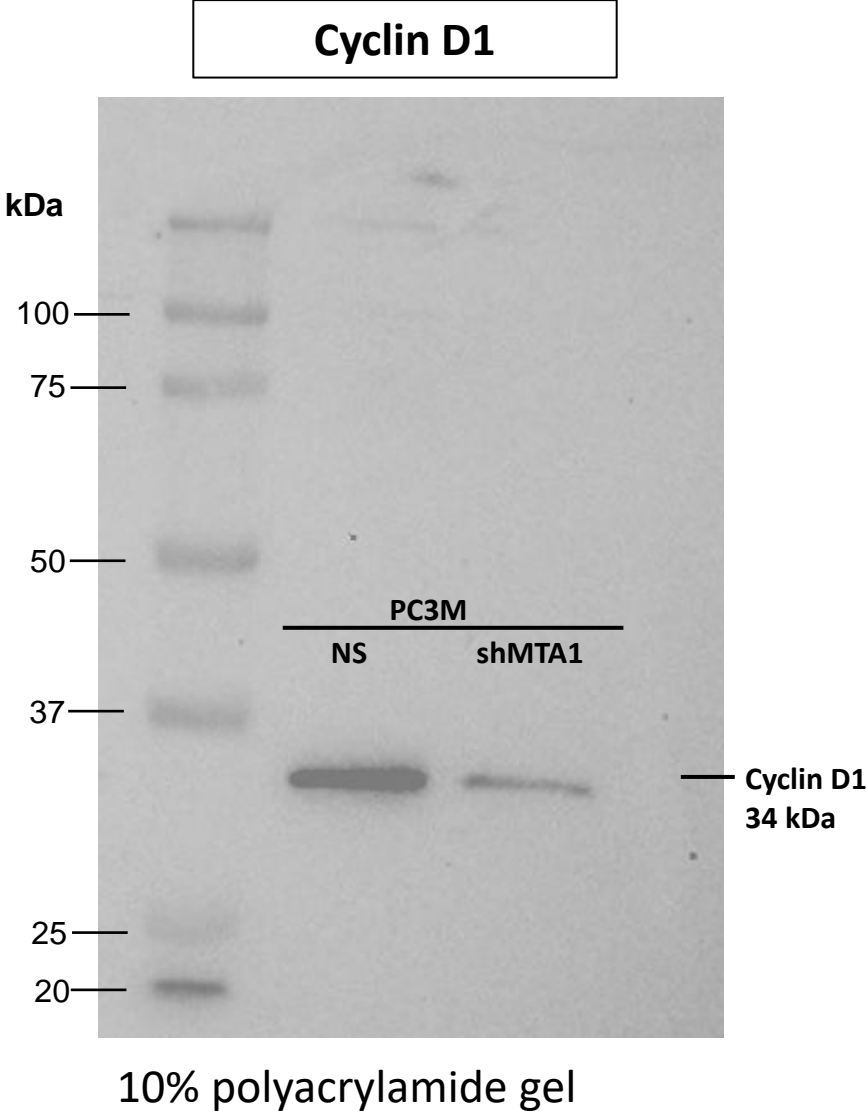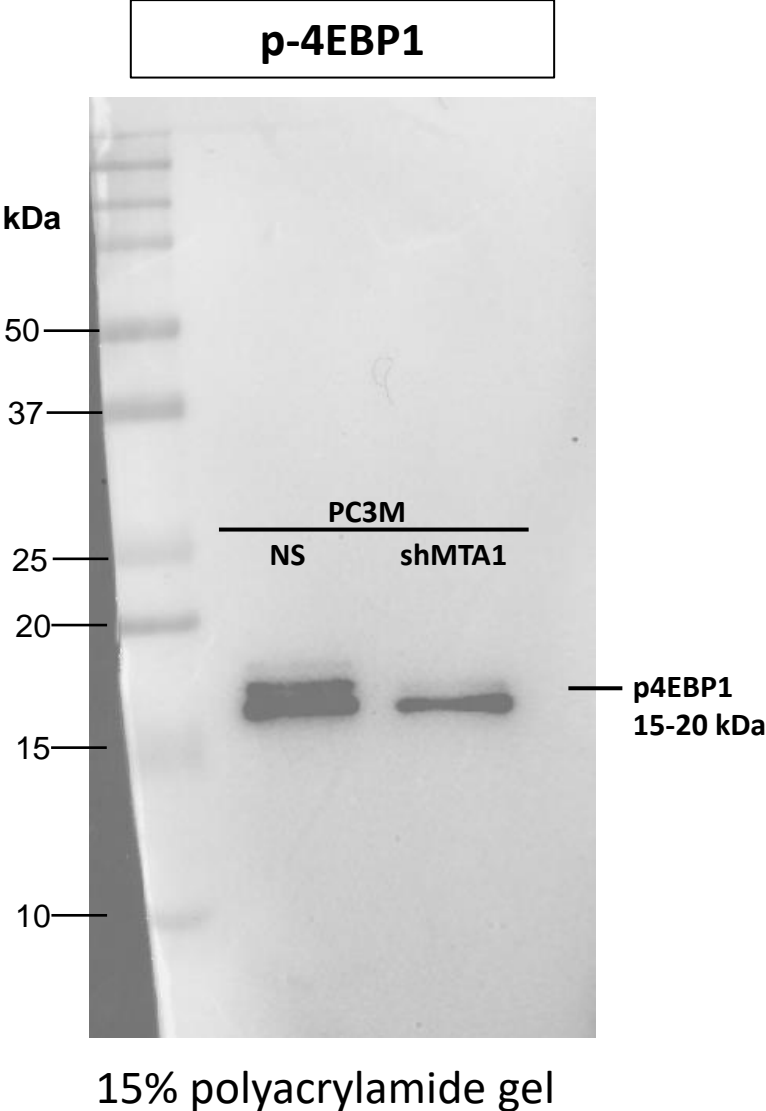

PC3M cells – whole blot images (figure 3a)

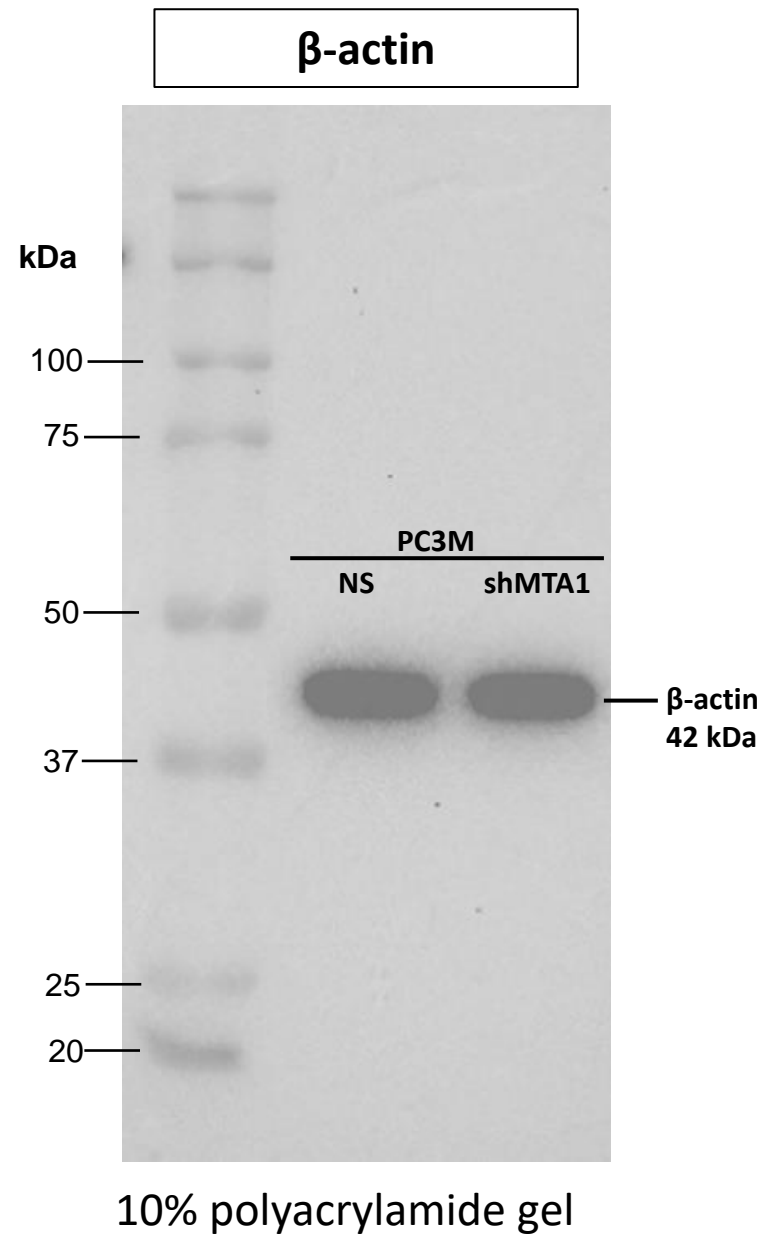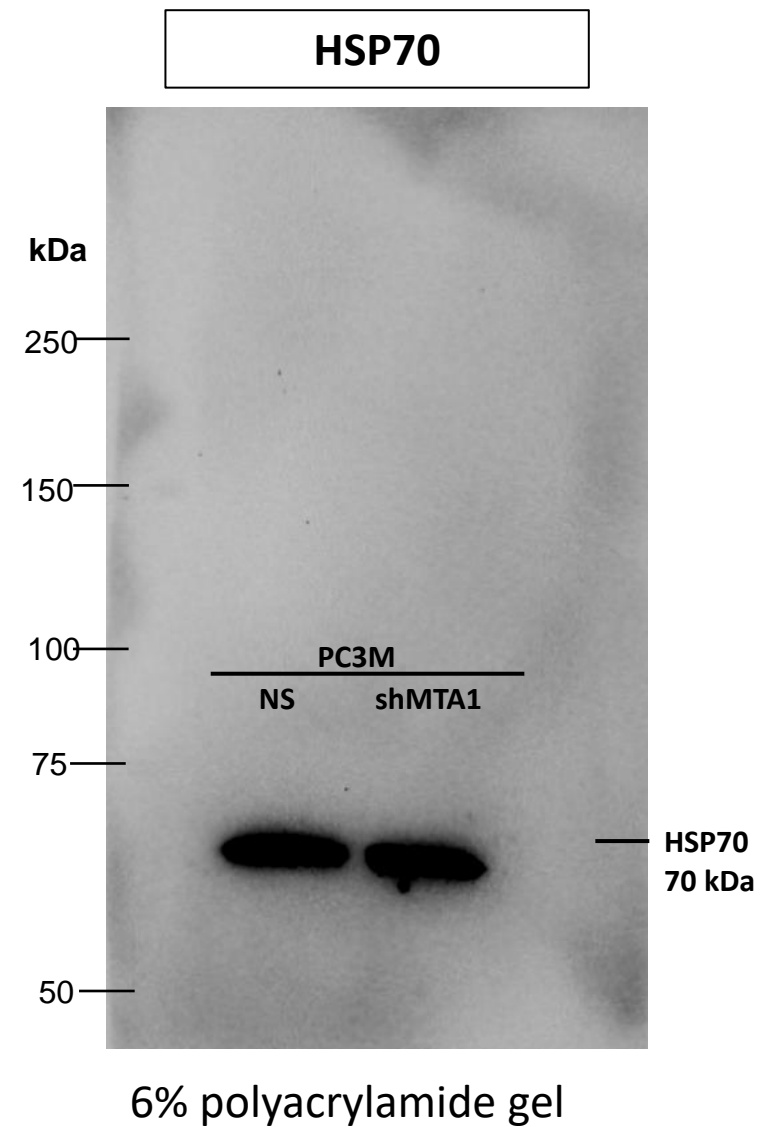

# PC3M cells treated with Gnet C – whole blot images (figure 3b)

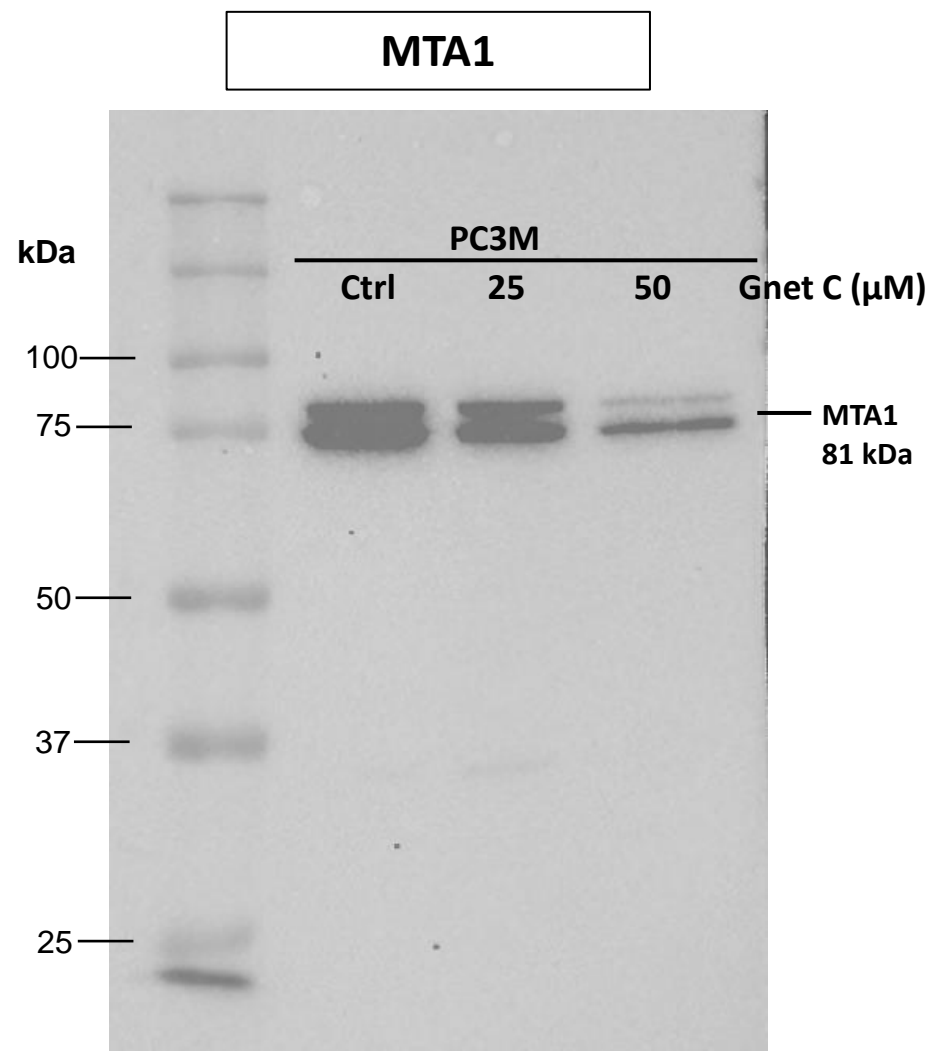

10% polyacrylamide gel

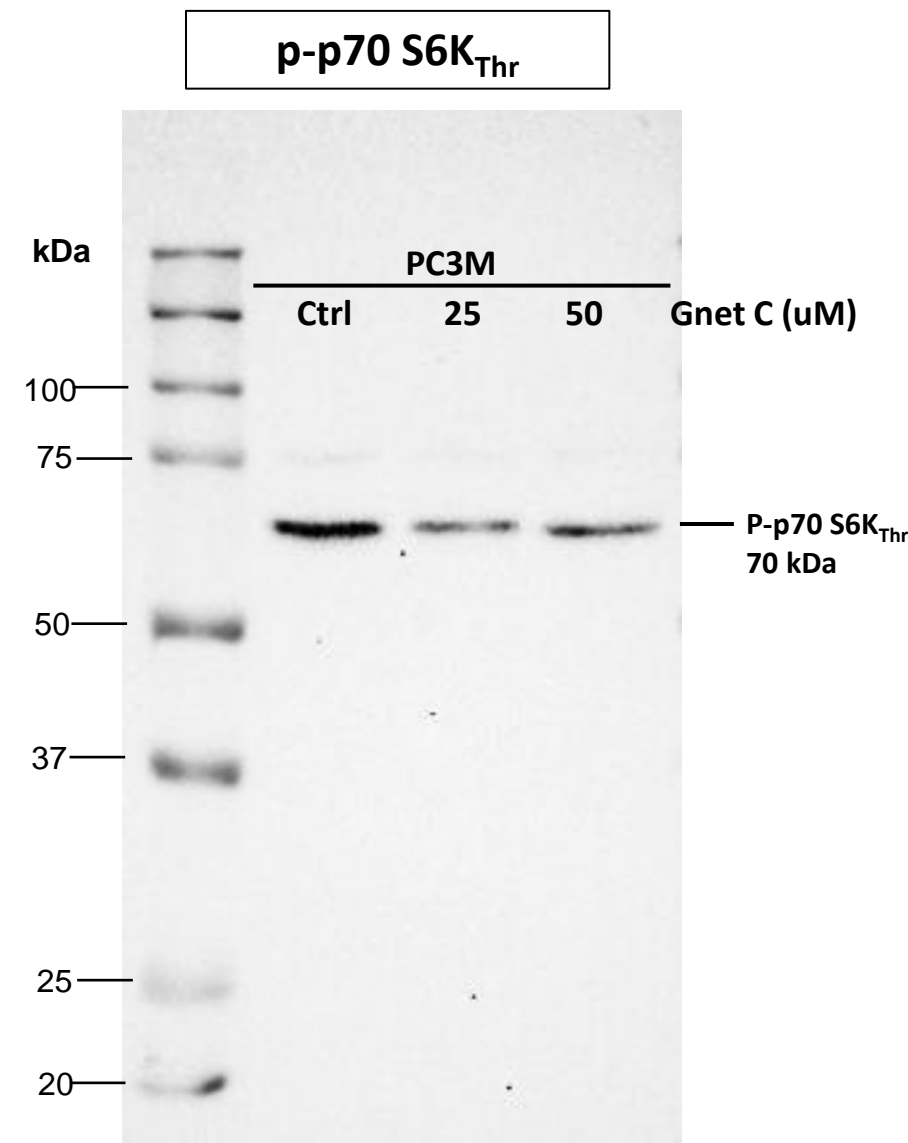

10% polyacrylamide gel

PC3M cells treated with Gnet C – whole blot images (figure 3b)

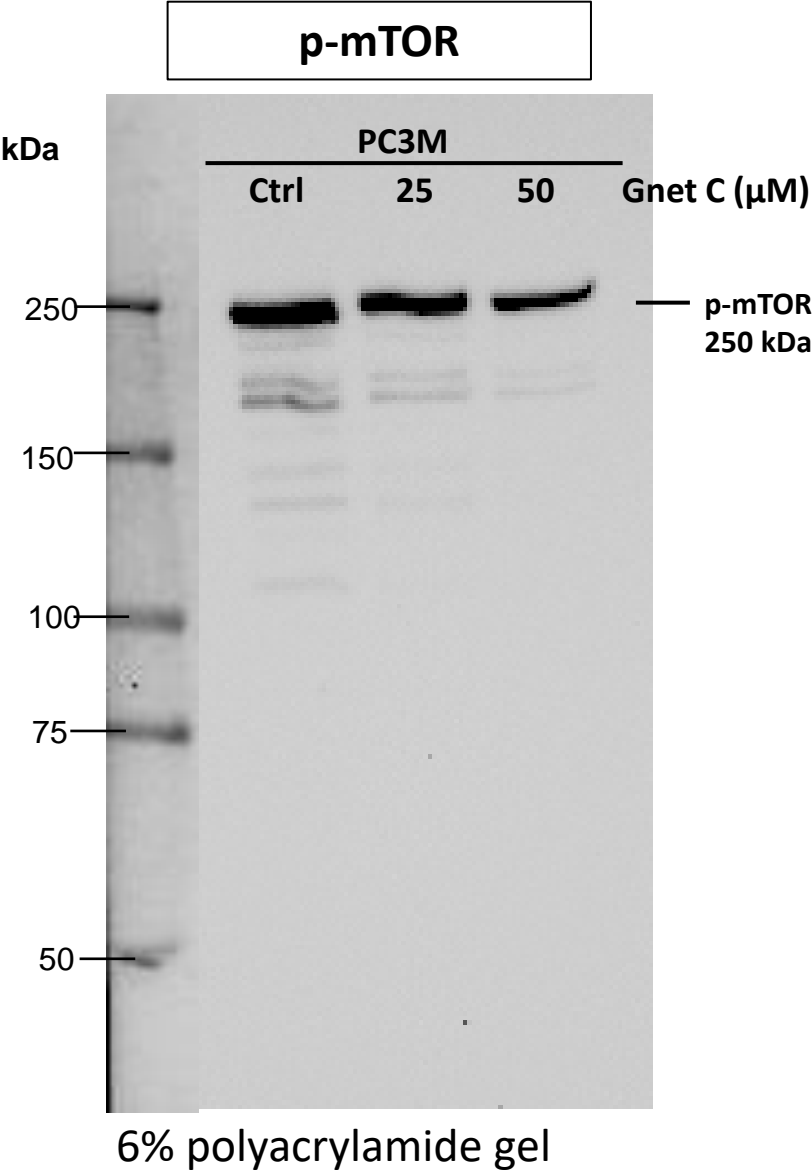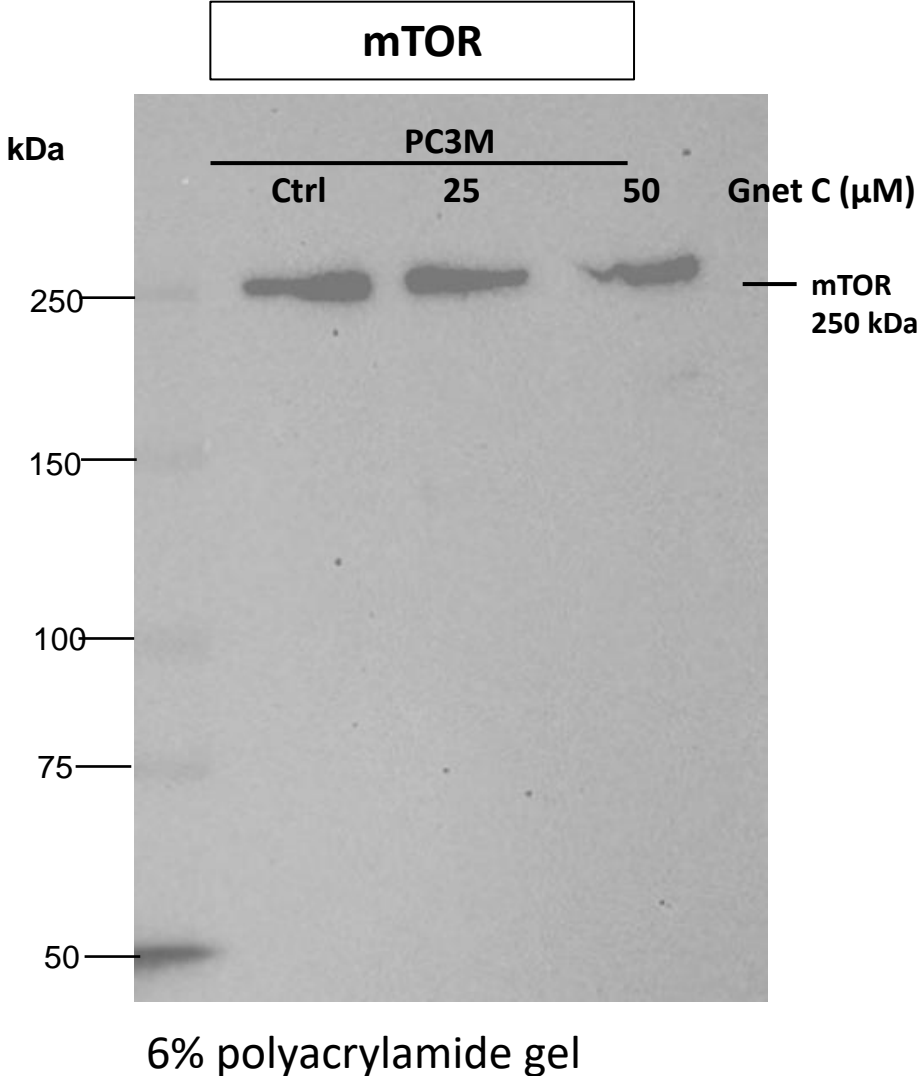

# PC3M cells treated with Gnet C – whole blot images (figure 3b)

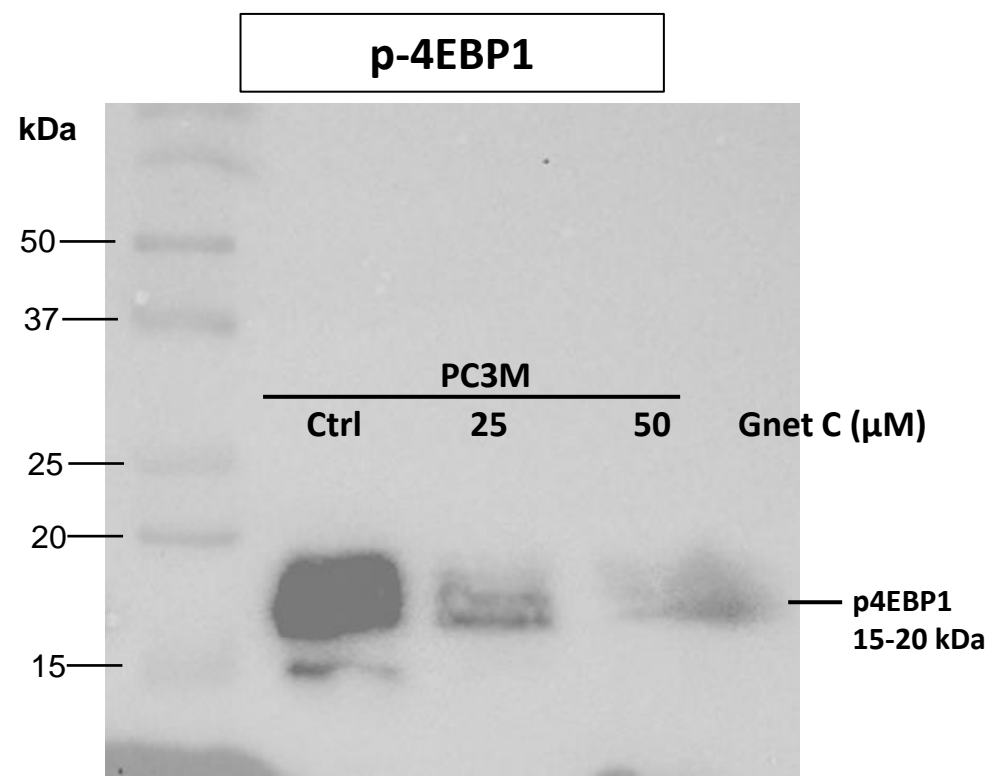

15% polyacrylamide gel

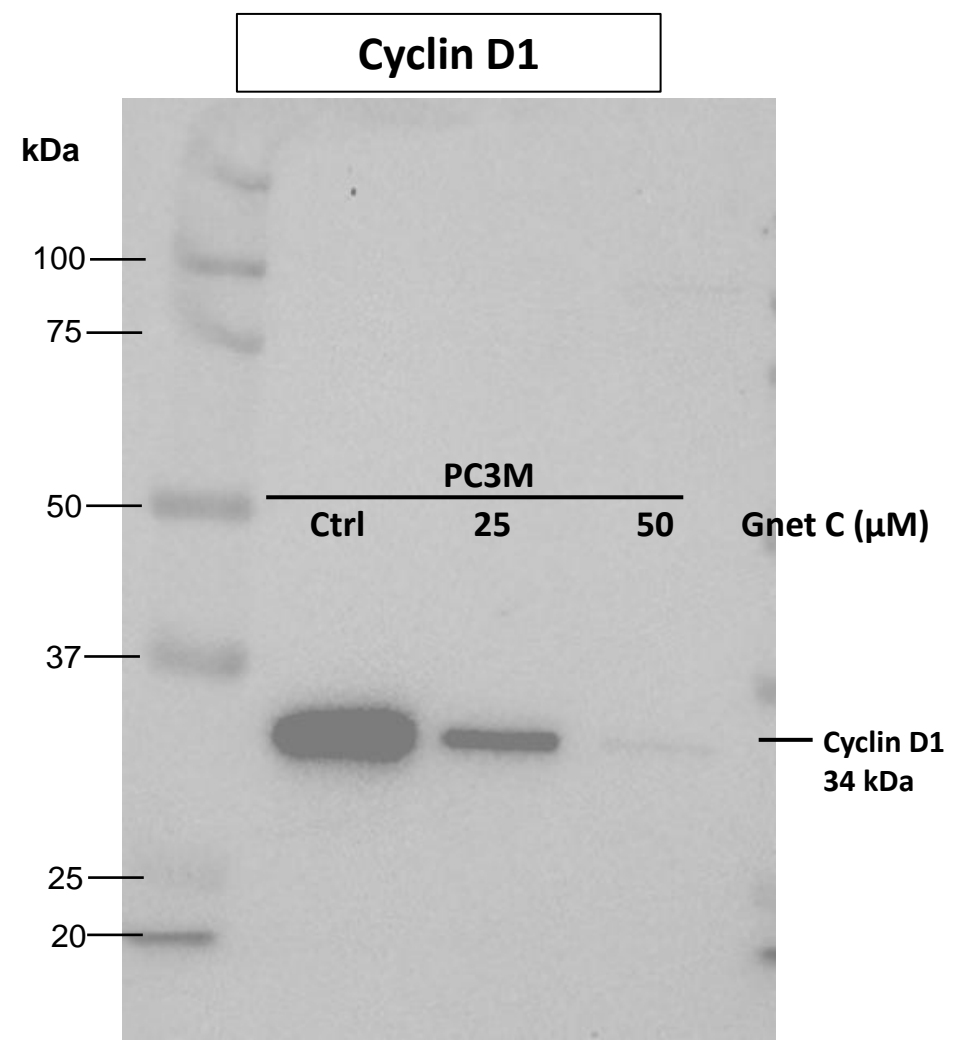

10% polyacrylamide gel

PC3M cells treated with Gnet C – whole blot images (figure 3b)

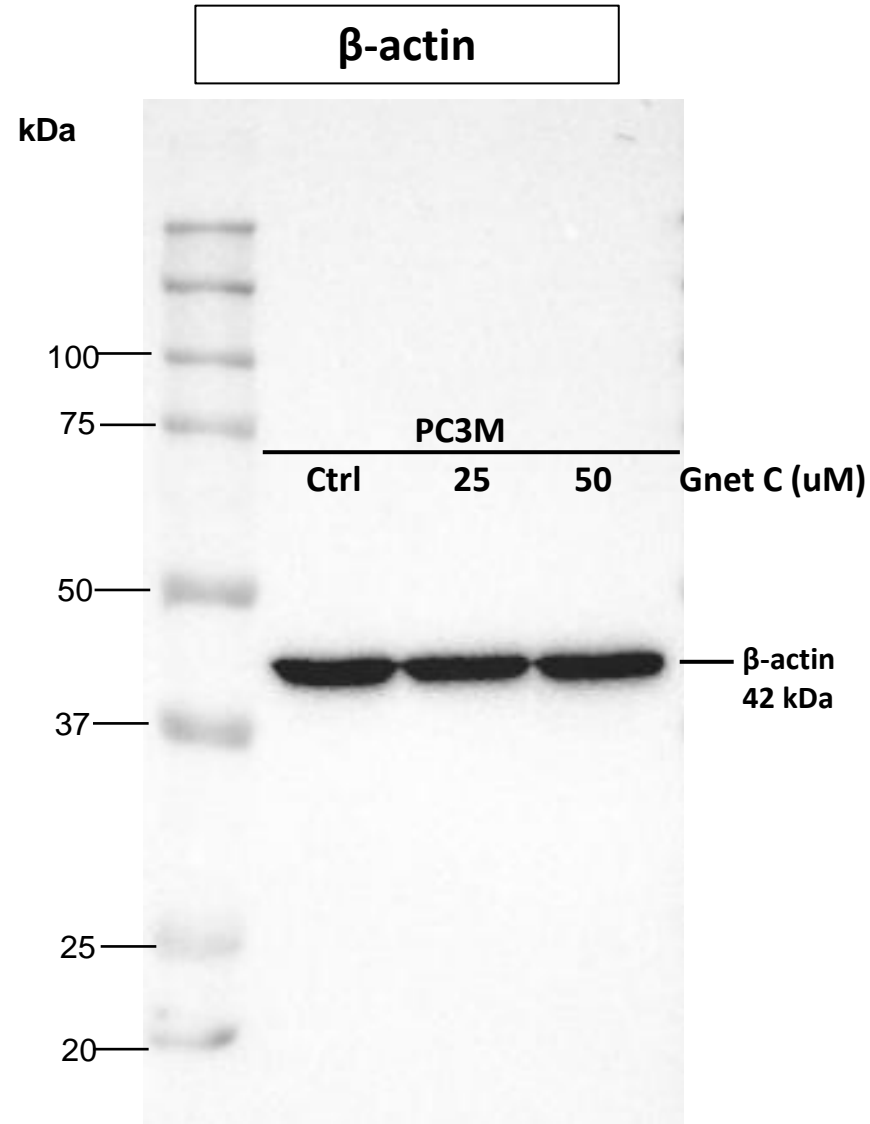

10% polyacrylamide gel

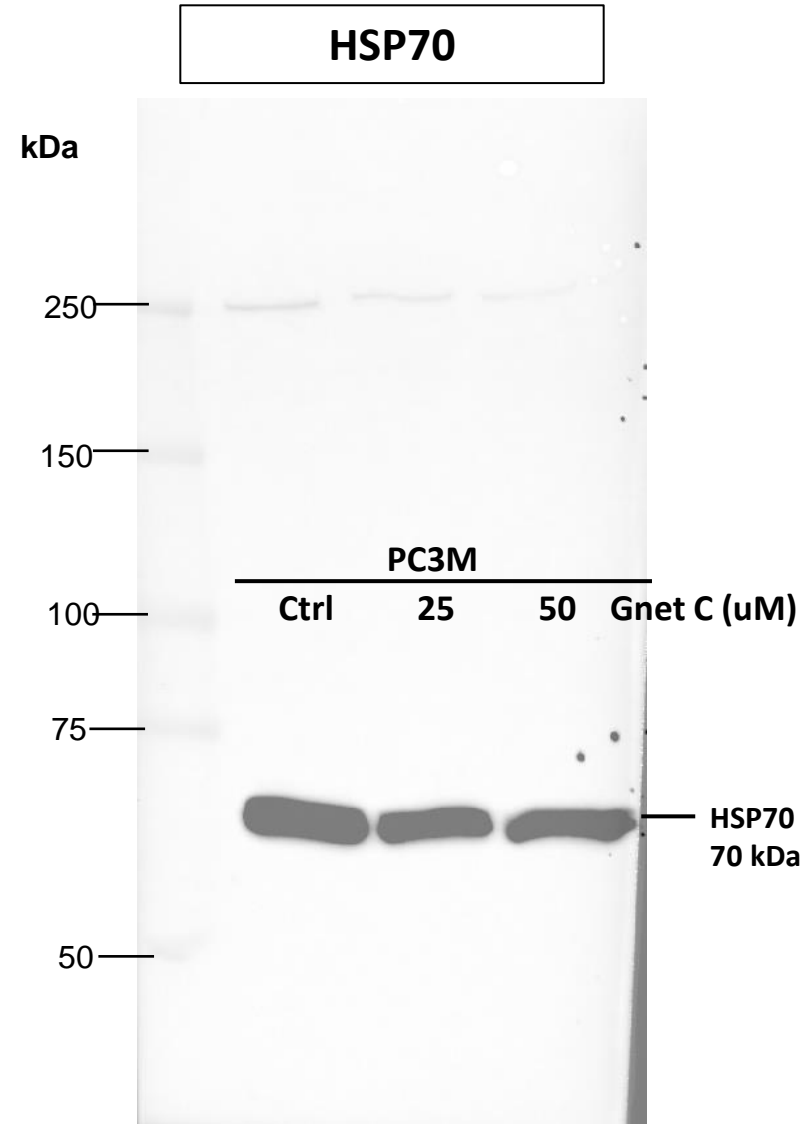

6% polyacrylamide gel

# Prostate tissues – whole blot images (figure 6)

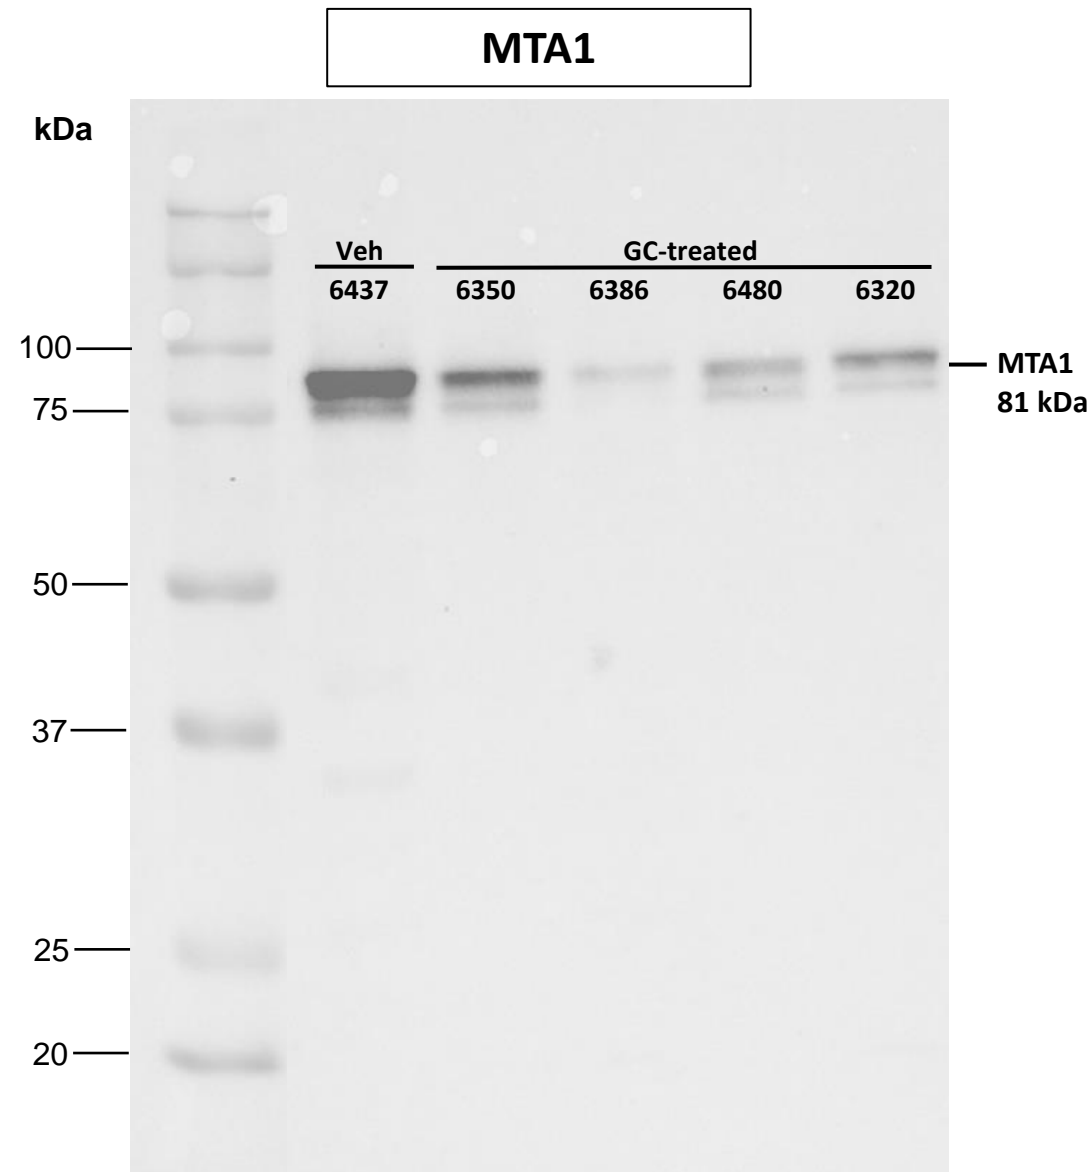

10% polyacrylamide gel

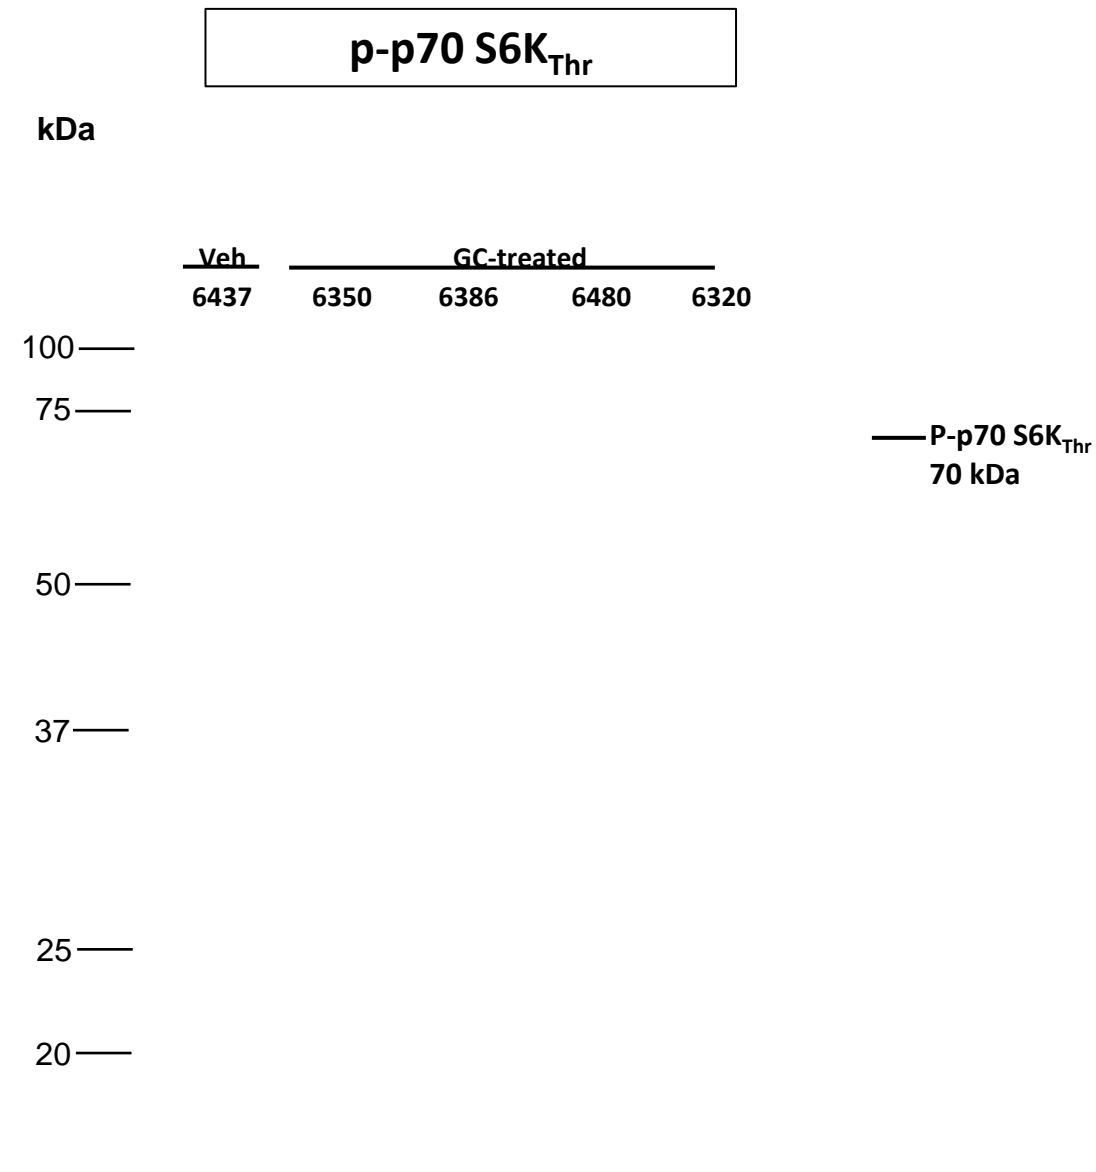

10% polyacrylamide gel

# Prostate tissues – whole blot images (figure 6)

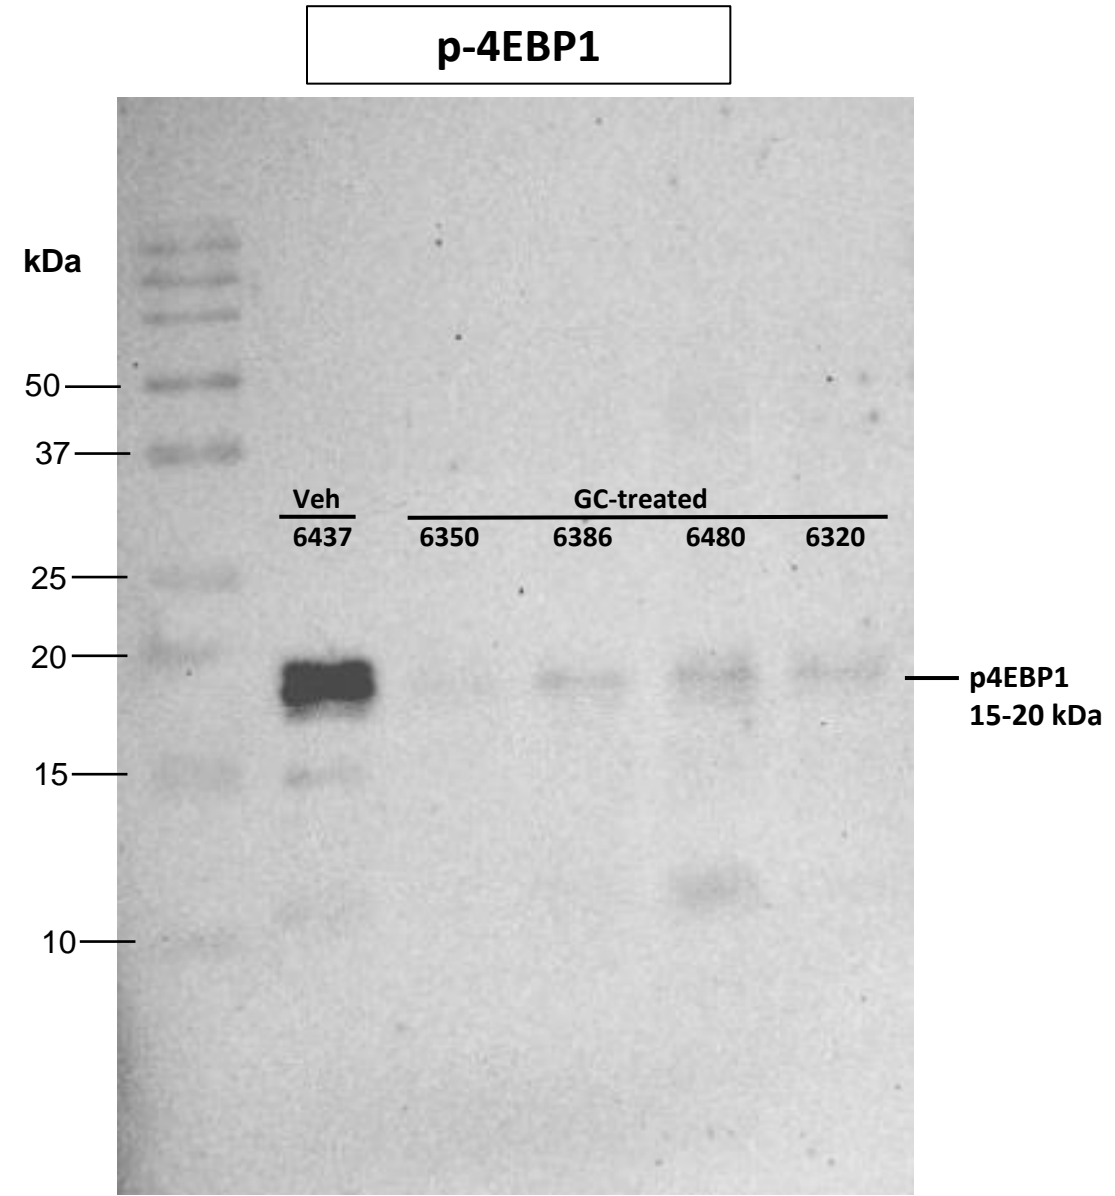

15% polyacrylamide gel

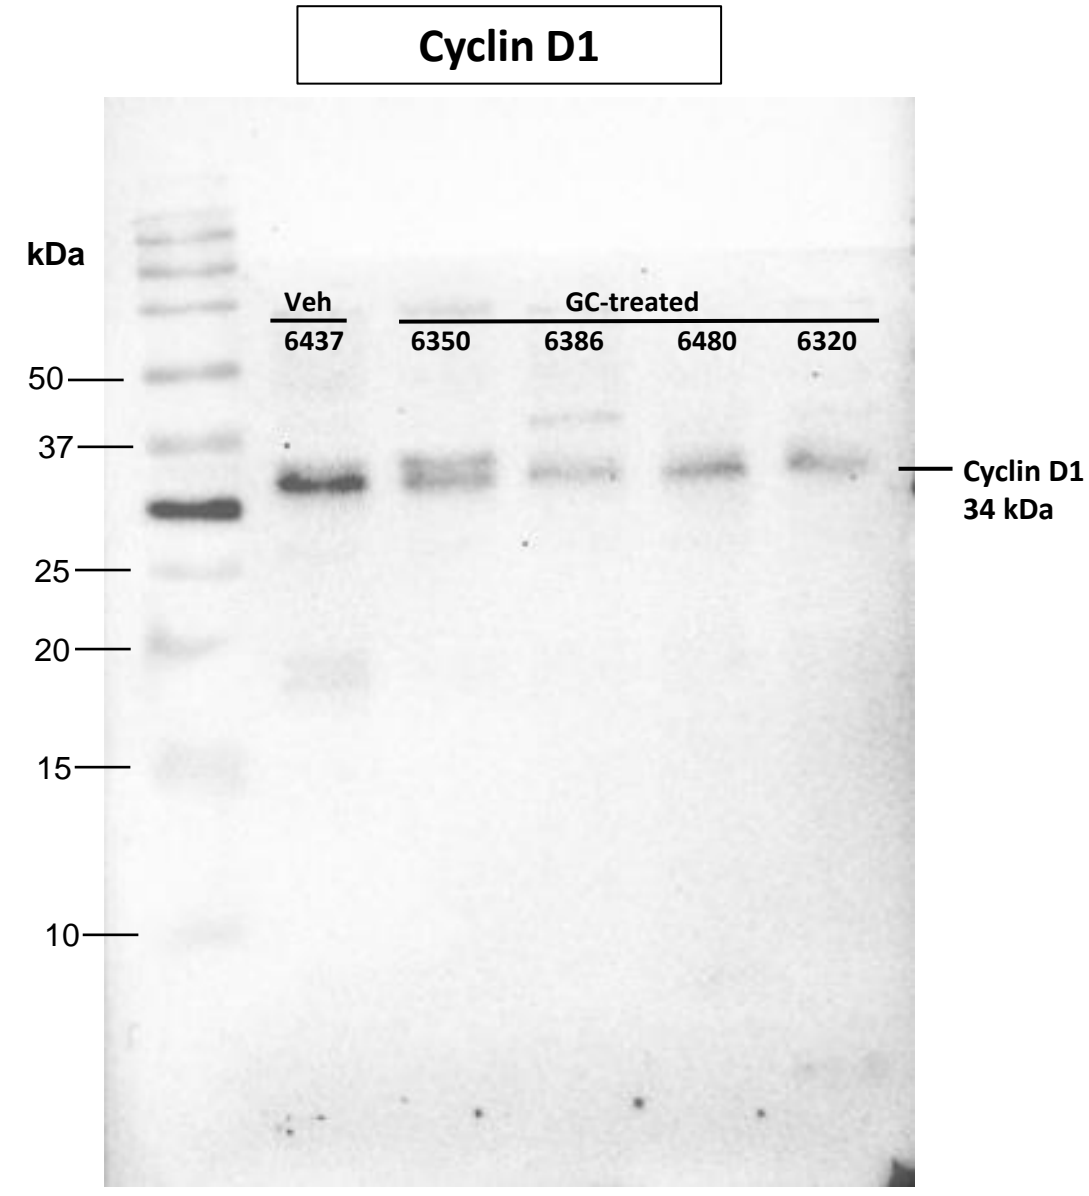

15% polyacrylamide gel

# Prostate tissues – whole blot images (figure 6)

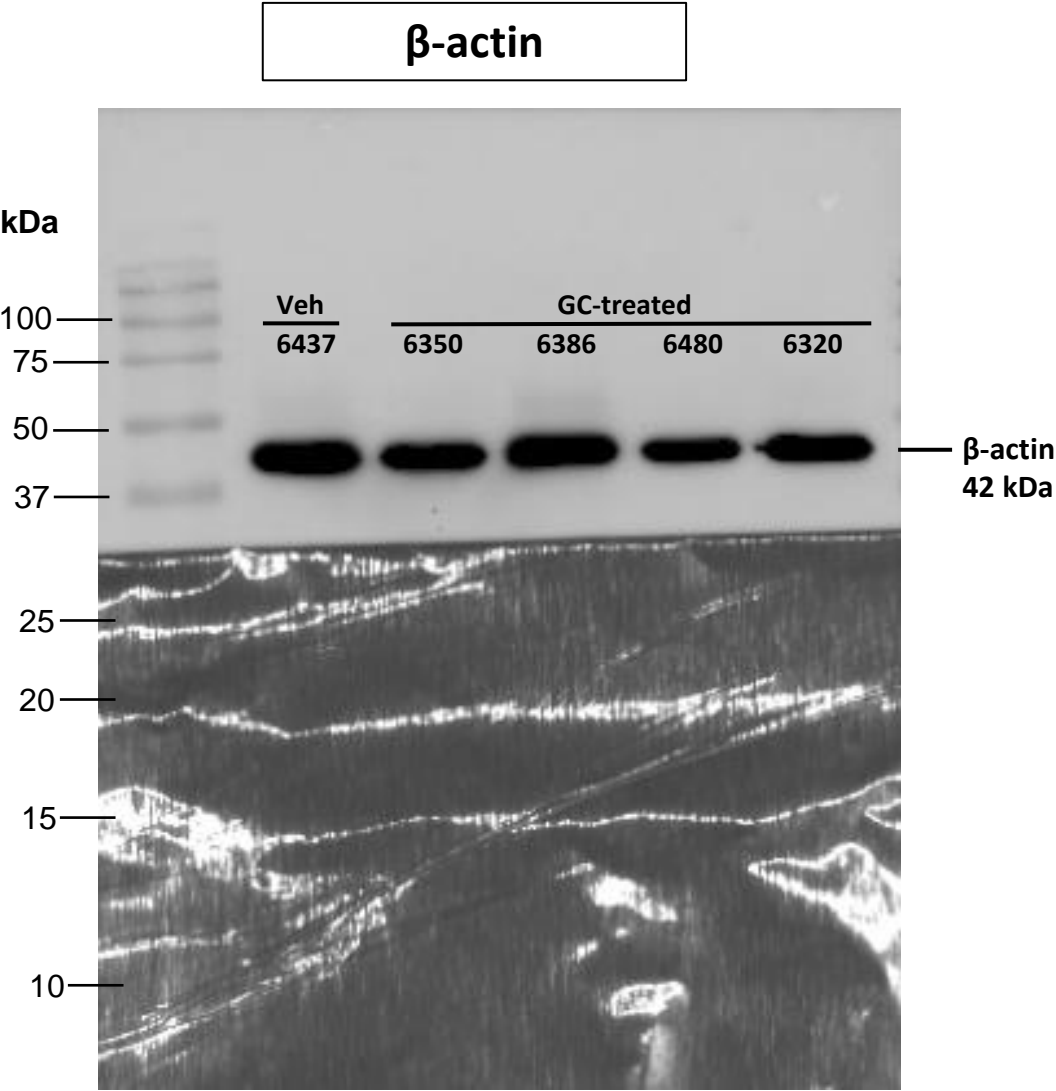

15% polyacrylamide gel
