# Supplementary material for: The Therapeutic Efficacy and Mechanism of Action of Gnetin C, a Natural Compound from the Melinjo Plant, in a Preclinical Mouse Model of Advanced Prostate Cancer
Source: MDPI journal article supplement (doi:10.3390/cancers16071344), 2024-03-29
Supplement: s1 [file s1]

**A**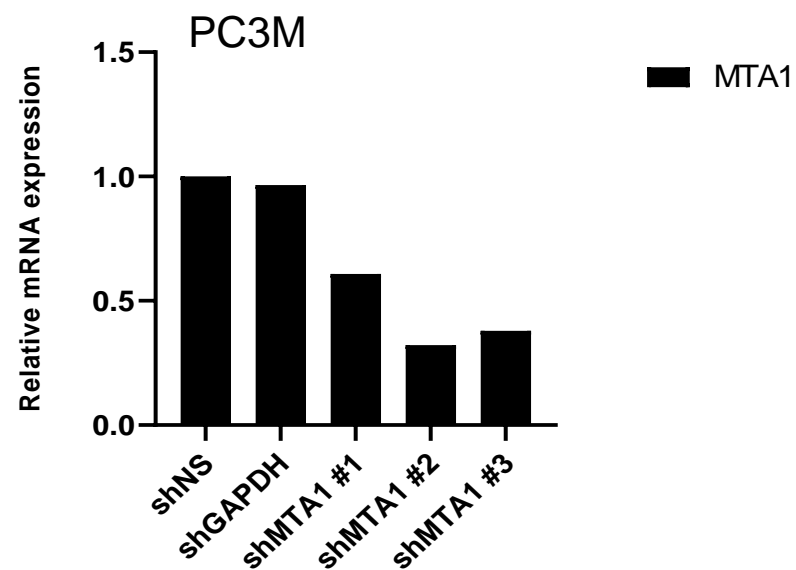**B**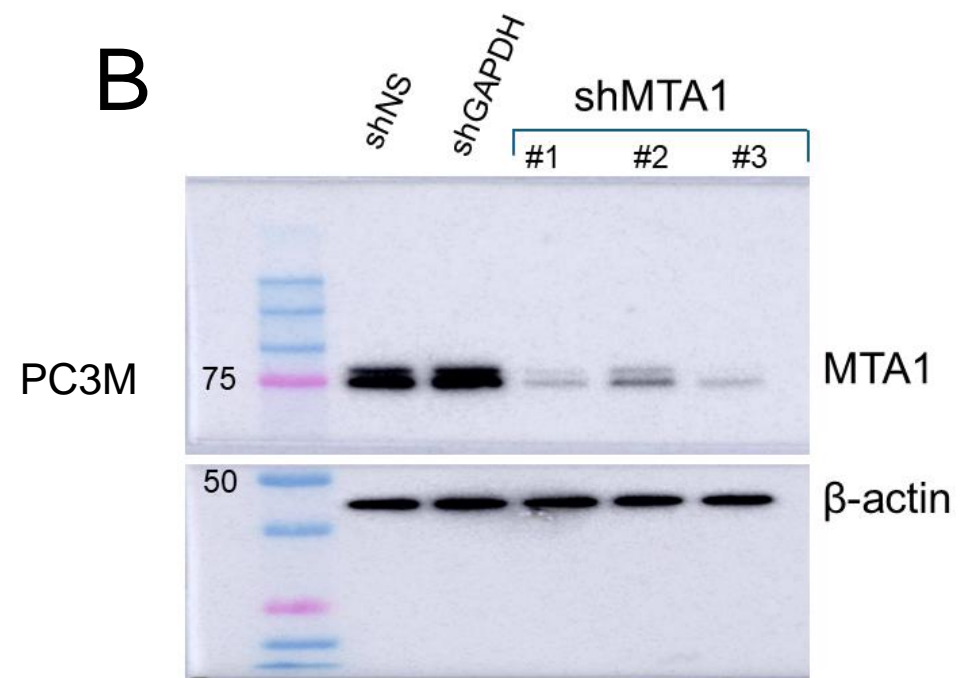**PC3M- MTA1 KO**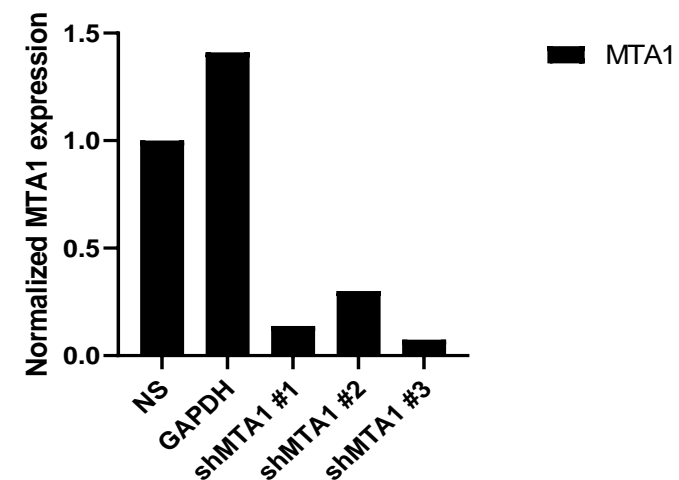

**Figure S1.** Validation of MTA1 knockdown in PC3M cells. **(A)** Relative mRNA levels of controls (shNS, shGAPDH) and three shMTA1 constructs. **(B)** Representative normalized protein levels of resulted knockdowns in controls and shMTA1. MTA1 knockdown was achieved as described previously [24]. The clone #3 was chosen for the current study.

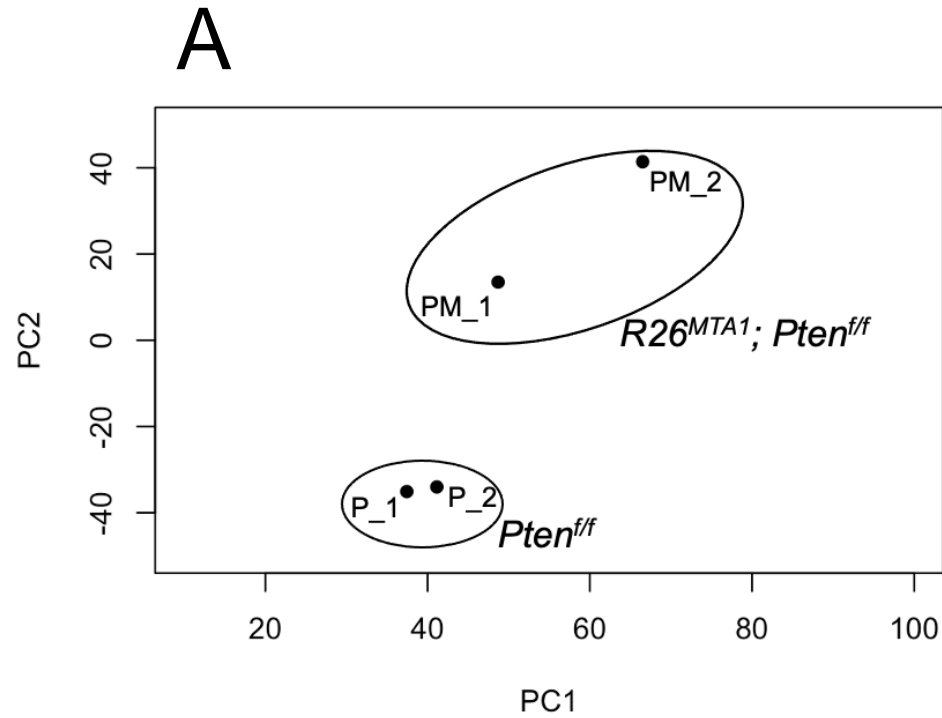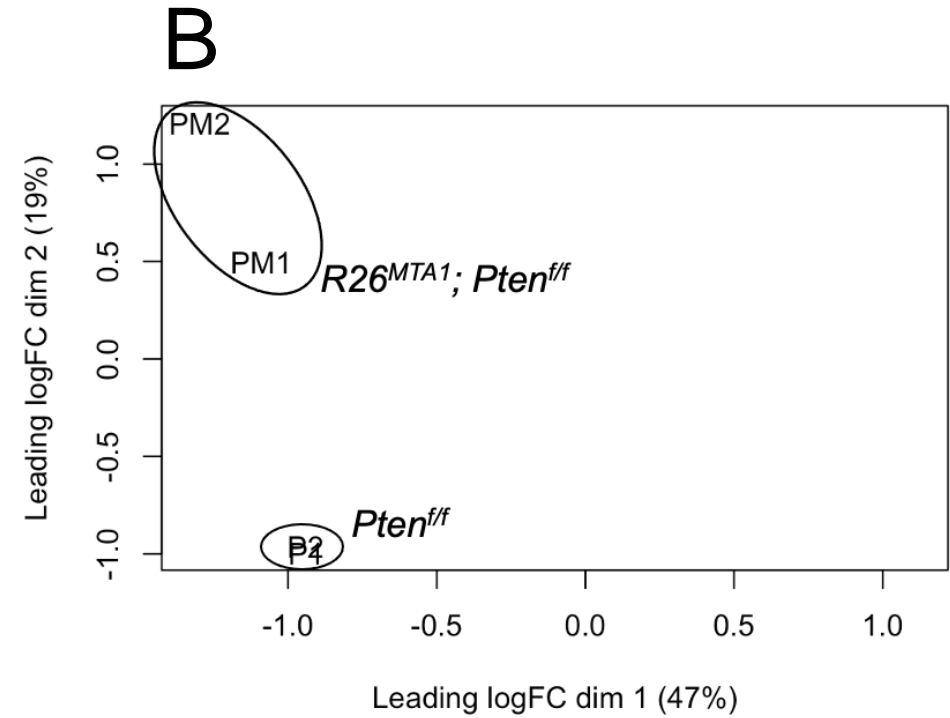

**Figure S2.** (A) Principal Component Analysis (PCA) and (B) Multidimensional Scaling (MDS) scatter plot of gene expression showing variance of the two biological replicates of each of the two mouse genotypes, *Pten<sup>ff</sup>* and *R26<sup>MTA1</sup>; Pten<sup>ff</sup>*."
