# Supplementary material for: The Therapeutic Efficacy and Mechanism of Action of Gnetin C, a Natural Compound from the Melinjo Plant, in a Preclinical Mouse Model of Advanced Prostate Cancer
Source: Cancers (Basel). 2024 Mar 29;16(7):1344. doi: 10.3390/cancers16071344 (PMC11010822; doi:10.3390/cancers16071344)
Supplement: Supplementary file 1 [file cancers-16-01344-s001.zip]

Archive with 5 entries (5 files):
- cancers-2893305-File S1.pdf
- cancers-2893305-supplementary figures.pdf
- cancers-2893305-supplementary Table S1.pdf
- Table S2 Hallmark Gene sets.xlsx
- Table S3 Heatmap-PMvP.xlsx
