# Supplementary material for: The Therapeutic Efficacy and Mechanism of Action of Gnetin C, a Natural Compound from the Melinjo Plant, in a Preclinical Mouse Model of Advanced Prostate Cancer
Source: Cancers (Basel). 2024 Mar 29;16(7):1344. doi: 10.3390/cancers16071344 (PMC11010822; doi:10.3390/cancers16071344)
Supplement: Supplementary file 1 [file cancers-16-01344-s001.zip › Table S2 Hallmark Gene sets.xlsx]

## Sheet: Sheet1
Geneset	Size	Overlap	OddRatio	p-value	FDR	log10FDR(-)	Genelist
HALLMARK_MTORC1_SIGNALING	192	36	3.72311	7.85e-10	3.93e-08	7.40561	ACTR2, ACTR3, ASNS, ATP2A2, CANX, CCNG1, CCT6A, CTH, DDIT4, ELOVL6, ENO1, GBE1, GLA, GMPS, GOT1, HMGCS1, HPRT1, HSPA5, LTA4H, ME1, MTHFD2, PIK3R3, PITPNB, PNO1, PSAT1, PSMA3, QDPR, RRM2, SCD, SERP1, SLC7A5, SQLE, SSR1, STARD4, TFRC, UFM1
HALLMARK_PROTEIN_SECRETION	92	22	5.02437	1.65e-08	4.12e-07	6.3851	ADAM10, ANP32E, AP3S1, BET1, CAV2, CLCN3, CLN5, COPB1, DNM1L, GLA, LAMP2, RAB14, RAB5A, RAB9A, RER1, SCAMP1, STX12, TMED10, TMX1, VAMP3, VAMP7, YIPF6
HALLMARK_MYC_TARGETS_V1	185	32	3.36108	5.09e-08	8.49e-07	6.07109	ACP1, AP3S1, APEX1, C1QBP, CANX, CNBP, DHX15, EIF1AX, EIF2S1, EIF4E, ERH, HNRNPA3, HPRT1, MCM6, ODC1, PABPC1, PCBP1, PCNA, PRPS2, PSMA1, PSMD1, PTGES3, RSL1D1, SRSF1, SRSF7, TARDBP, U2AF1, VBP1, VDAC1, VDAC3, XPO1, YWHAQ
HALLMARK_UNFOLDED_PROTEIN_RESPONSE	103	20	3.84125	2.58e-06	3.22e-05	4.49214	ASNS, BANF1, CEBPG, CNOT6, DDIT4, DNAJB9, EIF2S1, EIF4A2, EIF4E, HSPA5, LSM4, MTHFD2, PAIP1, PSAT1, SERP1, SLC7A5, SPCS3, SRPRB, SSR1, YWHAZ
HALLMARK_ANDROGEN_RESPONSE	94	18	3.76961	9.91e-06	9.91e-05	4.00393	ALDH1A3, B4GALT1, BMPR1B, CCND1, DNAJB9, ELL2, GNAI3, HMGCS1, HPGD, LIFR, NGLY1, SCD, SGK1, SLC38A2, SPCS3, STEAP4, VAPA, ZBTB10
HALLMARK_HEME_METABOLISM	176	24	2.51658	0.000133773	0.00111477	2.95281	ABCG2, ALDH6A1, ARL2BP, ASNS, BPGM, CA1, CLCN3, DAAM1, DCUN1D1, ELL2, GLRX5, GMPS, KAT2B, LAMP2, LMO2, NEK7, NUDT4, OSBP2, SDCBP, SLC30A1, TFRC, TRAK2, XK, YPEL5
HALLMARK_INTERFERON_GAMMA_RESPONSE	180	21	2.80227	7.87516e-05	0.00393758	2.40477	C1R, CD274, CD74, CSF2RB, GBP6, HELZ2, IL2RB, IRF5, IRF8, ISG15, ITGB7, MT2A, MX1, OAS2, OAS3, RSAD2, SERPING1, SOCS1, SP110, TNFAIP2, ZBP1
HALLMARK_MITOTIC_SPINDLE	193	20	2.44735	0.000561616	0.0140404	1.85262	ANLN, ARHGAP4, ARHGEF11, ARHGEF2, CENPE, CEP250, DOCK2, DST, LMNB1, MYH9, NUMA1, PCNT, PLEKHG2, PLK1, PREX1, PXN, RHOF, SHROOM1, TAOK2, TRIO
HALLMARK_ADIPOGENESIS	187	21	2.00827	0.0040795	0.0291393	1.53552	ACADL, ATL2, ATP1B3, CHUK, CMPK1, COX7B, DECR1, DNAJB9, ELOVL6, GBE1, IDH3A, LIFR, ME1, MYLK, PFKFB3, PHYH, QDPR, REEP5, RNF11, RTN3, UQCRQ
HALLMARK_BILE_ACID_METABOLISM	109	14	2.33334	0.00547148	0.0341967	1.46602	ABCA5, ABCA6, ABCA9, ABCD3, CROT, CYP39A1, GC, HSD17B11, PEX1, PEX7, PHYH, PNPLA8, SLC27A2, SLCO1A2
HALLMARK_OXIDATIVE_PHOSPHORYLATION	173	19	1.9561	0.00772126	0.0428959	1.36758	ABCB7, ACADSB, ALDH6A1, ATP6AP1, COX7A2, COX7B, DECR1, IDH3A, LDHB, NDUFA1, NDUFB5, PDHB, PDP1, PHYH, TOMM22, UQCRC2, UQCRQ, VDAC1, VDAC3
HALLMARK_FATTY_ACID_METABOLISM	151	17	2.00986	0.00895692	0.0447846	1.34887	ACADL, ACSL4, APEX1, BMPR1B, CYP4A11, DECR1, EHHADH, GLUL, HMGCS1, HPGD, HSD17B11, MAOA, ME1, ODC1, PDHB, PRDX6, SERINC1
