# Supplementary material for: The Therapeutic Efficacy and Mechanism of Action of Gnetin C, a Natural Compound from the Melinjo Plant, in a Preclinical Mouse Model of Advanced Prostate Cancer
Source: Cancers (Basel). 2024 Mar 29;16(7):1344. doi: 10.3390/cancers16071344 (PMC11010822; doi:10.3390/cancers16071344)
Supplement: Supplementary file 1 [file cancers-16-01344-s001.zip › Table S3 Heatmap-PMvP.xlsx]

## Sheet: Counts-PM v P
Gene_Name	P_1	P_2	PM_1	PM_2	FDR	significant
Sult1c2	18.37	24.02	33.49	29.43	4.43863e-62	yes
Gsto1	140.63	254.08	152.8	176.17	2.49653e-40	yes
Sdcbp2	13.7	14.4	22.19	17.69	5.09469e-40	yes
Lgals3	59.77	73.36	72.92	74.58	2.82103e-37	yes
Psapl1	10.57	15.6	11.31	11.76	3.58472e-37	yes
Ugt2b34	37.51	54.99	43.75	39.89	9.41093e-37	yes
Apobr	6.14	15.01	20.7	16.08	9.89627e-35	yes
Muc13	9.87	8.87	9.53	7.27	1.57582e-34	yes
Ifit3	29.77	35.29	39.76	28.15	3.04469e-33	yes
Clip4	3.97	5.99	4.15	7.68	8.90586e-33	yes
Nedd9	6.15	5.57	14.95	8.46	2.83021e-32	yes
Eya2	16.77	24.05	36.49	43.74	5.07242e-32	yes
Anxa3	36.3	33.08	30.6	34.04	1.62254e-31	yes
Myo1a	3.1	5.48	6.66	11.4	3.11399e-31	yes
Als2cl	7.67	10.09	12.86	23.53	3.11399e-31	yes
Oasl2	22.35	22.95	20.06	19.43	3.11399e-31	yes
Cd14	30.32	42.96	42.62	39.87	1.16902e-30	yes
Tacstd2	89.51	103.07	121.9	81.43	3.2088e-30	yes
Ckmt1	30.43	36.49	24.32	27.78	4.03561e-30	yes
Ifit3b	17.8	22.8	20.58	16.76	9.78108e-30	yes
Ifit1bl1	25.35	20.62	12.63	9.91	1.09197e-29	yes
Inava	4.61	6.43	8.85	11.17	6.29051e-29	yes
Thbs1	55.17	65.57	69.91	78.1	1.38266e-28	yes
Fer1l4	5.69	8.23	10.71	16	3.47157e-28	yes
Fam83e	6.02	7.02	8.39	14.91	3.9543e-28	yes
S100a11	275.43	338.72	655.48	329.93	2.65179e-27	yes
Scnn1a	12.5	21.5	29.86	26.67	3.50936e-27	yes
Slc40a1	19.81	25.09	20.79	15.59	4.51862e-27	yes
Ppp1r1b	46.89	62.73	133.88	118.94	7.75167e-27	yes
Car12	3.53	6.41	9.81	9.73	2.99519e-26	yes
Vil1	12.5	17.15	17.85	16.95	4.67937e-26	yes
Sprr2a1;Sprr2a2;Sprr2a3;Sprr2b	419.66	407.38	202.56	213.91	5.34029e-26	yes
Padi4	3.18	5.95	10.3	7.34	5.90774e-26	yes
Isg15	11.02	11.74	48.27	36.5	6.4653e-26	yes
Hsd11b2	18.09	14.59	38.6	23.62	1.86501e-25	yes
Cxcl15	28.41	27.42	39.94	10.17	3.82483e-25	yes
Aspa	5.86	8.83	7.32	17.21	4.02964e-25	yes
Slc2a2	0.15	0.25	2.09	6.02	4.38691e-25	yes
Osbpl3	8.18	8.67	6.42	7.84	7.58356e-25	yes
Slfn2	18.42	22.12	22.31	26.81	9.54721e-25	yes
Lypd8	484.48	468.22	175.91	216.09	9.56279e-25	yes
Oas2	4.41	3.98	5.39	31.58	8.4564e-24	yes
C130026I21Rik;A530032D15Rik;Sp110	2.43	2.31	3.6	7.49	9.2757e-24	yes
Arg1	32.8	9.27	25.39	16.36	1.03418e-23	yes
Vill	31.37	29.43	33.49	35.3	1.03418e-23	yes
Slc39a4	80.27	107.19	136.23	83.26	4.6504e-23	yes
Rad51b	1.81	5.2	10.29	6.19	5.61665e-23	yes
B4galnt2	130.56	97.38	87.34	84.25	7.455e-23	yes
Bace2	19.61	21.48	14.39	11.04	7.55229e-23	yes
Atp10b	16.76	16.91	19.01	14.7	9.03173e-23	yes
Itprid1	2.02	4.69	4.58	3.3	1.28617e-22	yes
Tnfsf10	18.76	37.41	20.31	13.67	4.9194e-22	yes
Kcne3	18.67	18.28	11.97	4.35	5.79317e-22	yes
Barx2	16.19	20.47	31.56	25.36	7.19635e-22	yes
Marcksl1	54.87	53.49	92.25	46.14	1.0572e-21	yes
Ctse	45	83.52	68.88	63.05	1.11993e-21	yes
Xdh	13.01	14.31	13.04	19.55	1.30544e-21	yes
Kcnk5	16.82	12.05	14.17	17.89	1.49956e-21	yes
Ltbp2	10.22	14	13.11	43.31	2.00356e-21	yes
Spns2	26.27	16.76	20.06	20.85	6.78653e-21	yes
Prss32	20.26	21.15	12.34	21.14	1.04466e-20	yes
Gsdmc4;Gsdmc2;Gsdmc3	92.91	108.92	154.52	149.95	1.09064e-20	yes
Elf3	99.98	110.99	94.91	113.67	1.47147e-20	yes
Nos2	2.72	2.98	1.46	3.38	1.47411e-20	yes
Il1rn	4.13	2.61	6.62	3.8	1.68058e-20	yes
Oasl1	6.23	9.32	13.12	15.99	1.71547e-20	yes
Mgat3	13.19	21.21	23.62	20.76	2.20644e-20	yes
Ubd	7.78	7.65	12.12	6.61	2.37352e-20	yes
Ms4a8a	5.94	4.36	5.92	7.38	3.41144e-20	yes
Bcl3	10.58	9.57	9.53	10.01	5.8668e-20	yes
Mgat4a	21.58	28.43	19.58	16.14	7.68816e-20	yes
Misp	3.48	5.96	13.22	2.02	8.03854e-20	yes
Krt4	283.45	421.58	491.35	403.85	2.26637e-19	yes
Zbp1	2.8	4.14	5.08	11.99	3.53551e-19	yes
Tnip3	4.44	4.62	2.28	2.2	4.11408e-19	yes
Slfn4	2.44	1.69	5.22	10.1	8.63577e-19	yes
Icam1	8.9	14.7	13.35	10.96	9.22195e-19	yes
Wnt4	18.95	30.45	27.16	29.19	9.686e-19	yes
Sestd1	6.75	10.69	8.04	8.58	1.01588e-18	yes
Pparg	4.66	6.5	8.73	4.8	1.5144e-18	yes
Cfb;C2;Gm20547	10.22	17.96	15.79	24.71	2.33352e-18	yes
Sh3pxd2b	8.51	9.29	7.8	9.8	4.02504e-18	yes
Myof	28.13	39.98	45.82	43.93	5.29927e-18	yes
Cd200r3	4.21	6.31	1.39	4.55	5.3059e-18	yes
C4b	7.89	18.66	25.18	32.64	5.97776e-18	yes
Gcnt3	1.6	2.8	2.33	2.66	8.31676e-18	yes
Pglyrp1	122.72	174.16	152.28	118.63	9.20021e-18	yes
Anxa1	236.42	242.45	208.26	122.29	9.27808e-18	yes
Anxa8	19.93	27.21	22.1	18.63	1.32291e-17	yes
Itga2	16.77	21.82	17.89	13.84	1.65524e-17	yes
Itln1	0.33	0.25	0.41	0.05	1.71841e-17	yes
Car8	13.73	18.8	12.72	15.9	1.89523e-17	yes
Tjp3	46.84	46.69	61.65	68.47	1.89523e-17	yes
Prss27	7.18	7.85	3.9	5.78	1.89523e-17	yes
Myo15b	4.08	4.43	4.55	12.14	2.4871e-17	yes
Plscr1	18.34	14.29	21.75	16.45	2.71644e-17	yes
Lrg1	386.57	114.51	200.54	148.04	3.93565e-17	yes
Fa2h	2.77	5.12	5.92	4.57	4.07174e-17	yes
Serpinb11	21.77	12.38	10.45	10.55	5.1506e-17	yes
Serpinb5	34.67	33.39	23.42	14.37	5.67626e-17	yes
Ccl20	5.23	2.13	3.38	4.09	6.33024e-17	yes
Krt7	13.85	20.92	31.04	31.52	6.33812e-17	yes
Ly6d	183.44	334.88	544.89	331.34	6.39137e-17	yes
Bhlhe40	20.01	24.2	17.49	25.89	6.58966e-17	yes
Ifi27l2b	1.63	3.03	8.14	11.2	7.56754e-17	yes
Ttyh3	12.37	15.02	18.15	21.7	9.64684e-17	yes
Reg1	8.32	13.57	12.93	28.69	1.16783e-16	yes
Arhgef2	4.61	6.19	8.39	9.64	1.35054e-16	yes
Syt16	0.53	0.72	0.88	0.85	1.51735e-16	yes
Serpina3g;Serpina3f;Serpina3n;Serpina3m;Serpina3k	7.04	11.61	12.23	18.58	1.58259e-16	yes
Muc1	7.85	13.04	16.87	27.09	1.79071e-16	yes
Abcg5	5.31	7.04	6.4	12.55	2.02039e-16	yes
Arl14	6.06	13.83	10.43	7.72	2.57775e-16	yes
Tnf	7.43	6.7	7.88	12.19	2.68143e-16	yes
Celsr1	6.43	8.93	8.78	12.94	2.72383e-16	yes
Chl1	2.82	3.65	1.87	3.26	2.77604e-16	yes
Cadps	4.08	3.76	2.97	2.8	3.0249e-16	yes
Enc1	23.93	20.81	17.62	13.34	3.0249e-16	yes
Slc12a7	3.86	5.18	13.28	8.19	3.34612e-16	yes
F5	2.06	4.08	4.32	5.12	4.52023e-16	yes
Mdfi	4.94	4.39	8.34	8.21	5.9278e-16	yes
Ppp1r3b	11.22	11.2	7.81	5.1	6.32872e-16	yes
Steap4	60.41	48.75	20.83	21.36	6.72319e-16	yes
Egln3	31.79	22.74	18.15	10.25	7.06431e-16	yes
Abcg1	6.37	8.16	10.97	5.24	7.0761e-16	yes
Tmc5	5.88	7.65	4.33	6.66	8.48913e-16	yes
Cyp2f2	160.34	301.35	447.84	390.12	1.07992e-15	yes
2310007B03Rik	5.87	8.87	11.54	13.02	1.09156e-15	yes
Stat1;Stat4	13.3	15.81	11.1	14.22	1.18681e-15	yes
Noxa1	6.3	5.85	4.94	11.06	1.79419e-15	yes
Chil6	4.31	3.63	5.65	14.32	1.8625e-15	yes
Myo7a	2.28	2.5	2.15	4.13	2.0798e-15	yes
Dhrs3	64.84	66.65	62.24	66.49	2.26701e-15	yes
Wfdc2	240.41	337.24	719.02	622.57	2.44794e-15	yes
Fam124a	8.66	11.13	10.61	9.71	2.52058e-15	yes
Itgb6	9.03	12.81	6.51	6.78	2.89799e-15	yes
Gprc5a	45.18	30.03	26.04	31.61	3.15383e-15	yes
Sh3pxd2a	15.24	17.32	17.26	20.5	4.04933e-15	yes
Hnf4a	10.91	11.12	3.36	10.83	4.12301e-15	yes
Acod1	0.63	0.97	4.85	1.26	4.31041e-15	yes
Lpcat4	51.5	49.04	47.93	55.4	4.56201e-15	yes
Specc1	3.19	3.07	1.94	1.65	4.90053e-15	yes
Ddx60	6.91	4.96	4.06	4.99	5.4295e-15	yes
Cftr	2.91	2.95	1.23	1.36	5.92917e-15	yes
Togaram2	0.5	0.68	1.22	3.12	6.72155e-15	yes
Eps8l3	3.94	3.64	6.25	7.01	6.84728e-15	yes
Gp2	5.12	5.75	5.45	1.89	7.04195e-15	yes
Csf3r	1.02	1.58	10.23	5	7.0971e-15	yes
Tmem63a	20.8	19.96	21.85	25.35	7.38298e-15	yes
Epha2	5.52	6.81	4.9	8.38	7.38298e-15	yes
Ier5	8.73	11.09	10.33	14.78	7.97588e-15	yes
Relb	8.92	9.29	10.14	11.03	1.45468e-14	yes
Tspan8	134.45	186.93	128.13	86.02	1.49885e-14	yes
Helz2	6.83	7.87	12.09	14.1	1.60874e-14	yes
Adcy8	2.37	2.44	4.37	2.34	1.68433e-14	yes
Ctsh	29.38	38.43	36.77	27.03	1.7395e-14	yes
Paqr4	10.29	10.99	12.89	11.69	1.7395e-14	yes
Siglec1	0.81	1.19	3.75	6.75	1.95139e-14	yes
Trim30a	10.17	8.57	10.03	8.57	2.14755e-14	yes
Spp1	8.79	3.86	15.97	6.07	2.42029e-14	yes
Klf5	42.15	54.81	38.27	44.63	2.59638e-14	yes
Pmepa1	8.1	12.63	14.4	20.19	2.63079e-14	yes
Rap1gap	4.17	4.91	8.92	10.94	2.73918e-14	yes
Traf4	17.27	13.4	15.94	15.36	3.00491e-14	yes
Pmaip1	8.51	18.69	5.1	7.37	3.27552e-14	yes
Aldh1a3	14.2	16.9	6.2	3.83	3.34354e-14	yes
Sval1	21.74	19.15	24.06	5.87	3.78343e-14	yes
Slc25a48	6.37	6.62	6.11	7.25	3.93569e-14	yes
Msx2	2.22	2.61	3.18	2.02	3.96859e-14	yes
Cxcl16	15.33	13.25	20.51	25.25	4.03527e-14	yes
Myh14	14.63	16.59	23.47	25.39	4.28943e-14	yes
Il4ra	4.9	7.78	3.95	11.76	4.92006e-14	yes
Gsta4	83.65	127.96	112.99	89.55	5.60197e-14	yes
Areg	2.9	5.64	1.31	0.79	6.75997e-14	yes
Scamp5	11.63	13.92	20.81	17.06	7.22564e-14	yes
Lgals3bp	60.19	66.59	95.74	110.95	9.75527e-14	yes
Rab32	11.91	15.3	10.59	10.73	1.03518e-13	yes
Dhx58	9	6.77	6.79	8.87	1.20574e-13	yes
Ifit1	43.67	32.76	29.97	16.49	1.7405e-13	yes
Sox4	45.63	50.54	28.62	19.75	1.79015e-13	yes
Osmr	3.05	4.24	2.19	2.7	2.13333e-13	yes
Ihh	6.58	6.11	9.08	7.9	2.27711e-13	yes
Ephb2	1.56	2.33	3.1	3.99	2.59411e-13	yes
Cd44	26.92	30.67	27.99	24.88	2.7181e-13	yes
Ceacam10	28.16	196.61	1.52	0.29	2.7181e-13	yes
Smpd3	4.91	6.38	1.07	2.11	2.84628e-13	yes
Ly6a;Ly6c1;Ly6c2	124.69	110.11	113.71	94.91	3.24718e-13	yes
Gal3st1	2.72	4.21	8.17	4.73	3.43504e-13	yes
Fkbp11	1.89	1.78	1.19	1.23	3.80739e-13	yes
Cyba	37.74	55.07	86.65	84.95	4.20889e-13	yes
Pnliprp2	0	0	0	0	5.46156e-13	yes
Tmprss4	39.92	34.32	45.05	49.78	5.71878e-13	yes
Insrr	1.14	0.91	4.84	5.98	6.03732e-13	yes
Atp2a3	23.4	31.02	23.34	25.15	6.53341e-13	yes
Parp14	11.33	17.44	11.73	22.76	7.85113e-13	yes
Ivl	1.57	2.88	20.11	7.26	8.82271e-13	yes
Epha4	5.9	5.7	2.64	3.67	8.98943e-13	yes
Cilp	11.33	21.85	13.09	24.73	9.53298e-13	yes
Clcn2	3.08	3.47	7.14	10.3	1.11988e-12	yes
Ern2	2.65	2.82	14.29	15.08	1.12071e-12	yes
Clca1	13.75	36.41	37.24	65.35	1.26536e-12	yes
Ephb3	4.6	7.02	5.78	8.97	1.40948e-12	yes
Sept9	8.29	17.68	20.47	22.7	1.43417e-12	yes
Tlr2	18.1	30.37	24.68	19.55	1.52652e-12	yes
Gxylt2	0.57	1.1	0.47	0.61	1.76135e-12	yes
Usp18	12.11	8.98	10.33	11.66	1.86462e-12	yes
Plat	4.3	5.32	3.24	5.02	1.99685e-12	yes
Dkk2	2.48	4.68	6.47	8.83	2.48629e-12	yes
Tnfrsf12a	12.67	4.77	13.1	6.74	2.56358e-12	yes
Car13	16.46	28.07	26.58	9.9	2.906e-12	yes
Irf7	15.01	15.85	21.92	19.03	3.0644e-12	yes
Msln	4.49	7.55	54.09	36.92	3.53574e-12	yes
Pklr	2.37	3.63	2.43	3.18	3.53574e-12	yes
Padi2	10.26	7.7	19.25	17.39	3.59648e-12	yes
Tnfaip2	1.25	2.17	2.86	3.19	3.72439e-12	yes
Col8a1	2.51	4.61	4.61	6.53	3.83156e-12	yes
Ddx58	12.97	14.96	11.8	10.32	3.9414e-12	yes
Engase	4.71	7.97	8.63	14.72	4.0115e-12	yes
Runx1	4.38	9.06	7.61	10.12	4.07163e-12	yes
Duoxa2	6.92	8.55	4.76	4.13	4.64084e-12	yes
Reg3b	258.94	381.17	390.88	399.09	4.64084e-12	yes
Chodl	8.62	8.46	4.24	4.15	4.64084e-12	yes
Onecut2	7.04	8.97	9.41	15.33	4.75021e-12	yes
Ffar4	12.85	4.02	17.36	10.45	5.68986e-12	yes
Scara3	13.23	27.69	32.82	19.38	5.79827e-12	yes
Rtp4	2.92	2.5	3.47	2.95	5.92176e-12	yes
Slc10a2	3.49	4.85	3.69	2.02	6.21088e-12	yes
Reg3g	206.76	379.13	262.13	224.05	6.94709e-12	yes
Rab39b	2.19	2.09	0.39	0.85	7.36074e-12	yes
Srgn	26.22	38.06	34.18	10.88	8.26244e-12	yes
Cpxm1	3.16	7.84	10.71	26.96	8.77284e-12	yes
Emp2	20.31	18.9	11.16	9.9	8.82707e-12	yes
Lbp	9.88	11.6	16.33	30.34	1.0092e-11	yes
Gabrp	91.42	159.85	81.54	91.78	1.04792e-11	yes
Lif	3.42	2.97	0.7	1.42	1.19413e-11	yes
Golm1	75.59	67.51	23.07	39.23	1.25457e-11	yes
Plk1	1.85	1.59	7.71	5.15	1.2727e-11	yes
Rsad2	4.77	4.22	7.15	4.47	1.40521e-11	yes
Col12a1	13.19	23.57	16.99	40.59	1.44133e-11	yes
Cdh17	18.28	15.86	5.8	4.85	1.55829e-11	yes
Ppm1e	0.64	0.58	0.34	0.19	1.56223e-11	yes
Abcg8	2.12	2.78	4.86	6.04	1.77026e-11	yes
Tnfrsf11a	9.54	10.63	10.21	8.89	1.87614e-11	yes
Gda	10.12	16.16	11.44	12.25	1.98349e-11	yes
Gpx2	16.46	11.62	5.19	12.7	2.03128e-11	yes
Scube2	0.13	0.21	0	0	2.25818e-11	yes
Hgfac	5.3	4.93	6.67	11.44	2.32583e-11	yes
Igsf9	6.94	7.8	9.25	7.6	2.4582e-11	yes
Oas1a;Oas1g	8.18	6.32	7.64	9.28	2.47257e-11	yes
Noxo1	22.43	19.22	16.85	13.61	2.54487e-11	yes
Csf1r	8.35	8.55	16.07	16.52	2.76456e-11	yes
Tgfbr2	47.12	33.81	22.32	27.7	2.83367e-11	yes
Map3k1	23.05	24.18	23.34	17.42	2.98971e-11	yes
Dtx4	31.41	24.93	23.21	24.95	3.08507e-11	yes
Sulf2	7.86	9.7	11.59	12.46	3.10506e-11	yes
Jak3;Insl3	3.09	3.64	3.75	5.82	3.32134e-11	yes
Plce1	6.36	5.69	7	9.52	3.60057e-11	yes
Gch1	4.06	3.43	2.26	2.68	3.83141e-11	yes
Tprn	11.58	14.5	14.67	22.97	4.7055e-11	yes
Sytl2	0.34	0.86	0.47	0.43	4.79147e-11	yes
Parp12	19.38	15.44	15.02	13.99	4.84597e-11	yes
Duox2	6.63	10.13	2.59	5.49	5.0899e-11	yes
Abcc5	3.42	4.98	6.75	12.47	5.21502e-11	yes
Lilrb4a;Lilr4b;Gm49339	0.83	0.87	2.95	2.13	5.72944e-11	yes
Ltf	67.84	123.83	179.61	88.12	5.72944e-11	yes
Tcerg1l	0.2	0.46	1.66	3.13	5.78723e-11	yes
S100a14	11.65	12.31	12.27	6.69	5.78723e-11	yes
Grhl3	1.13	2.84	8.2	4.1	6.02657e-11	yes
Sfrp1	13.29	28.41	18.74	27.72	6.13948e-11	yes
Nrxn1	0.07	0.14	0.44	0.49	6.13948e-11	yes
Cdhr2	5.07	6.18	5.41	3.28	6.31945e-11	yes
Ctss	101.06	104.44	53.4	56.15	6.64793e-11	yes
Me1	40.69	44.91	21.1	17.26	6.82134e-11	yes
Thbs2	2.81	3.84	3.99	6.75	7.1778e-11	yes
Rarg	10.88	11.36	22.91	28.54	7.21986e-11	yes
Chn2	1.07	1.78	0.84	0.81	7.32971e-11	yes
Dsg3	1.92	2.96	0.21	0.36	7.49832e-11	yes
Dtx3l	37.56	47.23	32.16	26.36	8.81407e-11	yes
Hpse2	4.26	2.98	1.36	1.08	1.00136e-10	yes
Cdc42ep5	18.53	21.99	32.92	25.98	1.01841e-10	yes
Cym	15.73	8.12	37.55	38.42	1.03864e-10	yes
Adrb1	3.87	5.14	3.79	6.57	1.04504e-10	yes
Sp100	5.65	5.38	5.77	8.22	1.06057e-10	yes
Ttc22	3.31	3.19	4.16	4.02	1.13664e-10	yes
Dnase2b	1.41	9.73	0.01	0.02	1.16157e-10	yes
Mmp14	9.64	15.85	9.54	14.79	1.20087e-10	yes
Psmb8	11.83	9.87	16.99	11.12	1.21838e-10	yes
Tnc	3.66	8.04	8.08	10.85	1.345e-10	yes
Gsap	2.43	2.35	1.54	1.46	1.47374e-10	yes
Tspo	57.07	58	71.43	51	1.94157e-10	yes
Hr	9.69	10.58	7.24	15.09	2.15796e-10	yes
Plb1	0.19	0.45	1.03	0.57	2.55376e-10	yes
Rdh9;Rdh1;Rdh16f1	2.07	2.01	3.32	0.53	2.56719e-10	yes
Tnfrsf1b	11.58	10.27	15.56	8.25	2.62798e-10	yes
Ttc9	2.03	3.9	0.51	1.65	2.65772e-10	yes
Nbeal2	23.7	20.79	28.41	45.44	2.65772e-10	yes
Dram1	5.37	2.36	15.32	6.65	2.73922e-10	yes
Tmem54	13.97	11.54	24.05	12.83	2.74671e-10	yes
Pdlim1	20.11	20.16	22.86	14.66	2.77035e-10	yes
Mrc1;Slc39a12	10.06	10.1	6.2	10.11	2.77648e-10	yes
Mpzl2	10.55	14.4	14.28	11.85	2.80711e-10	yes
Capn8	4.8	8.98	4.51	14.72	2.9193e-10	yes
Tmem173	18.84	14.06	35.35	36.19	3.0401e-10	yes
Dmbt1	54.31	53.1	180.79	132.95	3.17998e-10	yes
Saa1	15.75	2.21	2.84	1.85	3.20512e-10	yes
Igtp;Irgm2	13.35	12.69	14	10.57	3.33784e-10	yes
Klf15	1.92	1.35	1.12	1.51	3.62433e-10	yes
Ifitm3	128.32	130.51	149.34	101.46	3.70319e-10	yes
Tcirg1	10.04	7.92	13.02	27.58	3.95586e-10	yes
Grasp	0.94	1.49	4.79	6.56	4.31504e-10	yes
Svs1	57.43	626.19	1.13	0.58	4.40613e-10	yes
Tmem97	7.69	4.68	6.1	4.83	4.76278e-10	yes
Aqp3	0.49	1.87	4.59	0.44	5.01152e-10	yes
Cx3cl1	30.65	29.36	31.69	36.23	5.13576e-10	yes
Fosl2	13.17	14.96	14.44	19.58	5.29492e-10	yes
Pof1b	11.21	12.61	11.97	7.81	5.42735e-10	yes
Aldh3b2;Aldh3b3	3.04	4.55	5.41	5.92	5.49654e-10	yes
Svs3a	14.59	85.15	0.21	0.3	6.3518e-10	yes
Vcam1	2.13	3.83	6.46	4.07	6.4027e-10	yes
Notch3	9.69	9.77	11.92	14.63	6.40787e-10	yes
Syt8;Tnni2	2.62	3.5	7.11	18.61	6.81692e-10	yes
Cyp2d10	2.23	2.67	2.78	5.13	6.81692e-10	yes
Lad1	32.92	33.52	45.87	39.69	6.85706e-10	yes
Col25a1	2.09	0.59	0.66	0.31	7.30862e-10	yes
Clec4d	0.33	0.35	3.8	1.27	7.99152e-10	yes
Laptm5	9.64	9.18	16.82	15.18	8.00587e-10	yes
Fam57a	3.4	9.4	6.6	4.72	8.5077e-10	yes
Fxyd6	3.31	5.39	5.52	5.85	8.87369e-10	yes
Anxa2	102.79	93.68	83.68	67.17	9.19978e-10	yes
Capn2	21.35	17.54	12.65	12.03	9.55941e-10	yes
Ifi44	7.37	4.24	5.04	6.41	9.74762e-10	yes
2200002D01Rik	10.82	8.97	17.58	14.25	9.97361e-10	yes
Lgals9	31.67	55.89	36.01	46.66	1.03187e-09	yes
Gm3336	5.43	6.78	9.22	5.69	1.03936e-09	yes
Parp9	29.45	31.61	25.56	26.52	1.05639e-09	yes
Eppk1;BC024139	2.89	2.48	5.12	6.16	1.15362e-09	yes
Lfng	4.79	5.85	14.23	12.86	1.19086e-09	yes
Dhrs9	1.19	1.83	1.32	3.69	1.21599e-09	yes
Dgat2	26.7	33.81	34.3	26	1.34738e-09	yes
Ptpn18	4.99	4.59	6.47	8.22	1.34779e-09	yes
Apol9b	3.89	2.49	9.11	9.68	1.34779e-09	yes
Plaur	3.86	3.11	4.05	4.29	1.40739e-09	yes
Sptssb	1.73	4.18	22.07	0.82	1.41027e-09	yes
Ahnak2	1.76	3.02	3.01	3.94	1.55526e-09	yes
Anks4b	0.94	1.01	0.78	0.34	1.56772e-09	yes
Gucy2c	1.9	2.48	0.77	1.31	1.60077e-09	yes
Rnf150	1.94	3.21	2.03	2.47	1.71954e-09	yes
Mfge8	29.59	31.66	55.03	38.44	1.77328e-09	yes
Fcgr2b;Fcgr3	3.34	4.06	4.46	3.98	1.77779e-09	yes
Plekha2	11.71	19.2	11.93	15.37	1.78246e-09	yes
Irs1	5.49	2.52	1.68	2.75	1.78376e-09	yes
Trpm5	1.09	1.35	3.77	2.11	2.00426e-09	yes
Adar	9.43	9.78	11.77	16.79	2.26139e-09	yes
Prr16	2.56	4.04	1.27	2.35	2.27029e-09	yes
Mup20	2.15	6.08	16.58	21.84	2.27637e-09	yes
AA986860	4.51	3.55	4.88	9.66	2.40964e-09	yes
S100a1	106.67	148.53	131.55	77.05	2.51466e-09	yes
F3	10.52	12.34	7.18	6	2.66878e-09	yes
Ly6k	11.81	4.57	37.95	12.6	2.66878e-09	yes
Krt15	295.8	443.32	306.82	501.48	2.73961e-09	yes
Sdf2l1	22.6	18.8	13.96	11.33	2.76374e-09	yes
Ugt2b35	5.55	7.97	7.12	4.63	2.77205e-09	yes
C1qb	53.27	49.54	43.57	68.73	2.79076e-09	yes
Tacc2	19.25	11.44	16.19	18.26	2.87921e-09	yes
Spinkl	23.73	167.4	0	0	2.93497e-09	yes
C3	33.82	65.97	77.38	71.43	2.96885e-09	yes
Mmp3	2.01	3.76	0.43	0.28	2.98827e-09	yes
Mst1r	2.07	3.35	2.37	5.66	2.99116e-09	yes
Plk2	7.05	5.82	5.36	6.33	3.11716e-09	yes
Ifi211;Ifi204;Ifi203;Mndal	1.1	1.22	0.92	1.9	3.11716e-09	yes
Strip2	2.03	2.35	2.17	1.15	3.13665e-09	yes
Adam8	1.51	2.13	4.97	2.91	3.17778e-09	yes
Myo1f	1.62	1.75	3.68	5.24	3.30324e-09	yes
Bak1	14.23	15.07	16.94	13.21	3.32076e-09	yes
Lynx1	6.13	11.27	8.24	10.4	3.44834e-09	yes
1700017B05Rik	19.76	15.53	20.13	21.99	3.50025e-09	yes
9930111J21Rik1;9930111J21Rik2;Tgtp2;Psme2b;Gm5431	2	2.71	3.54	4.23	3.5023e-09	yes
Svs3b	15.74	79.12	0.82	0.15	3.69454e-09	yes
B3gnt3	35.54	42.28	32.81	5.01	3.70861e-09	yes
B3gnt7	0.84	1.31	1.2	0.95	3.96574e-09	yes
Dclk1	1.44	1.98	1.29	0.97	4.0554e-09	yes
Plekhg1	3.78	4.84	7.44	2.72	4.17667e-09	yes
Fes	2.11	2.84	4.57	7.51	4.24067e-09	yes
Sat1	38.91	42.61	66.85	69.62	4.56476e-09	yes
Bmp7	2.4	3.77	2.16	2.21	4.60171e-09	yes
Napepld	8.9	5.25	7.42	9.99	4.69644e-09	yes
Bsn	0.3	0.42	0.44	1.39	4.7499e-09	yes
Fras1	1.2	1.88	3.6	7.05	5.43776e-09	yes
Mgat5	4.79	3.46	3.61	4.99	5.67179e-09	yes
Ptpru	2.77	4.15	3.24	10.13	5.99144e-09	yes
Pgm2l1	3.75	7.79	5.58	2.89	6.02214e-09	yes
Otop1	0.13	0.45	0.76	0.37	6.09706e-09	yes
Avil	0.95	1.67	4.02	4.26	6.11273e-09	yes
Upk3a	0.91	3.15	9.02	6.13	6.12038e-09	yes
Sdc1	72.58	75.09	69.22	56.21	6.12038e-09	yes
Tmem40	7.72	6.25	7.56	4.09	6.19829e-09	yes
B3galt5	1.21	1.37	0.46	0.93	6.26881e-09	yes
Sema3f	5.14	5.95	7.59	11.94	6.26881e-09	yes
Gbp2	11.7	12.86	11.43	10.05	6.44227e-09	yes
Zdhhc13	26.83	25.2	23.37	18.32	6.68675e-09	yes
Itgam;Gm49368	2.64	3.06	6.95	5.67	6.97389e-09	yes
Satb1	0.95	1.47	0.62	0.44	7.41347e-09	yes
Socs3	5.62	1.53	6.1	11.4	7.52073e-09	yes
Spint1	24.18	26.63	50.93	48.26	8.18976e-09	yes
Maml2	3.08	3.71	5.32	7.03	8.55758e-09	yes
Sfrp4	3.23	9.87	2.8	8.75	8.75357e-09	yes
Lyz2	132.12	101.67	159.41	115.74	8.9403e-09	yes
Padi1	1.52	3.55	4.6	9.01	9.29556e-09	yes
Arhgef40	3.1	4.28	5.2	11.31	9.58374e-09	yes
C1rl	0.67	0.78	0.4	0.2	1.10355e-08	yes
Igfbp3	19.69	36.81	33.24	36.12	1.1166e-08	yes
Ufl1	6.31	6.54	4.39	5.74	1.15571e-08	yes
Incenp	2.73	3.37	4.02	3.89	1.16885e-08	yes
Slfn5	9.48	12.15	10.89	7.45	1.19499e-08	yes
Lama5	43.19	43.06	67.1	122.13	1.20374e-08	yes
Defb50	76.72	48.6	45.65	7.38	1.23545e-08	yes
Calca	0.13	0.48	0.56	3.68	1.24849e-08	yes
Pik3r3;1700042G07Rik;Gm49337	64.78	46.73	23.69	20.34	1.25917e-08	yes
Stom	18.68	17.54	12.33	10.2	1.26389e-08	yes
Prob1	7.76	12	8.73	10.27	1.28251e-08	yes
Smo	9.29	9.57	17.26	16.69	1.30737e-08	yes
Fam3b	25.97	23.36	14.34	12.64	1.31957e-08	yes
Naip6;Naip5;Naip2;Naip1	11.72	9.49	9.43	20.05	1.40296e-08	yes
Mcoln2	2.37	1.65	1.84	1.15	1.40749e-08	yes
Arl4c	12.18	17.81	12.54	13.38	1.41955e-08	yes
Mkrn2os	6.71	6.57	2.21	4.96	1.4979e-08	yes
Clmn	17.03	16.21	10.33	17.36	1.55639e-08	yes
Slc34a2	4.6	8.86	11.5	10.58	1.60525e-08	yes
Trim12a;Trim12c;Trim5	4.35	3.96	3.04	3.46	1.76281e-08	yes
Sectm1b	12.35	8.14	6.23	3.8	1.81623e-08	yes
Tfcp2l1	51.41	54.99	51.74	59.72	1.87854e-08	yes
Crybg2	1.05	1.07	2.32	2.19	1.88167e-08	yes
Lgmn	32.66	29.83	29.94	31.64	1.92423e-08	yes
Mt2	41.14	19.29	40.13	29.35	1.93178e-08	yes
Qsox1	42.08	57.55	58.15	42.9	1.94813e-08	yes
Ifi47;Olfr56	1.21	1.69	1.6	2.12	1.97092e-08	yes
Mgst3	56.78	54.51	90.22	70.6	2.07821e-08	yes
Abcc1	3.28	3.85	3.71	4.61	2.09724e-08	yes
Map4k4	7.62	11.02	9.72	9.41	2.10213e-08	yes
Klf10	17.65	28.49	31.21	20.97	2.18059e-08	yes
Rhoc	29.5	25.83	55.71	28.08	2.21484e-08	yes
Mrgpra3	0.24	0.65	0.09	0.87	2.23981e-08	yes
Col4a6	0.69	1.13	0.46	0.29	2.23981e-08	yes
P2ry6	4.42	5.77	2.95	10.89	2.23981e-08	yes
Cd101	0.2	0.19	1.77	0.83	2.32576e-08	yes
Pfkl	23.92	16.09	30.2	25.35	2.36057e-08	yes
Fxyd3	21.98	19.08	45.29	18.55	2.42292e-08	yes
Jakmip1;Gm1043	0.23	0.24	0.67	0.88	2.42292e-08	yes
Derl3	0.96	0.83	0.63	0.79	2.42292e-08	yes
Ntn4	8.35	9.72	7.48	10.6	2.56029e-08	yes
S100a6;S100a7a	46.81	55.84	40.12	37.54	2.62171e-08	yes
Cblc	20.37	17.51	18.92	21.53	2.72015e-08	yes
Rnf213	33.8	39.61	34.33	74.01	2.79179e-08	yes
Cfi	10.56	9.73	5.61	8.26	2.82395e-08	yes
Ccdc88c	3.99	2.53	5.77	8.29	2.90554e-08	yes
Arhgap27	8.21	7.56	10.25	10.94	2.90927e-08	yes
Mall	4.5	9.33	3.03	6.49	3.03982e-08	yes
Ripply3	8.88	12.44	13.24	21.79	3.13107e-08	yes
Ermp1	39.06	38.24	42.21	40.43	3.17522e-08	yes
Lox	10.98	22.22	7.21	13.35	3.23333e-08	yes
Smad9	0.2	0.44	0.4	0.47	3.33124e-08	yes
Nt5c2	5.02	5.01	4.86	6.83	3.43267e-08	yes
Avpi1	9.94	11.45	17.6	13.33	3.49817e-08	yes
Svs6	20.22	208.25	1.2	3.27	3.54298e-08	yes
Atoh1	1.03	1.26	2.89	1.08	3.54792e-08	yes
Serpine1	2.25	4.06	7.54	3.94	3.69543e-08	yes
Il1b	3.62	2.32	5.55	2.85	4.10086e-08	yes
Hs6st1	11.21	9.71	16.51	24.91	4.12124e-08	yes
Slc25a24	36.63	29.77	21.85	12.88	4.16501e-08	yes
Dab2ip	11.21	9.28	12.97	8.4	4.25472e-08	yes
Clec4n	2.41	2.02	3.78	2.88	4.31577e-08	yes
Nsmf	5.42	3.48	9.13	11.64	4.35768e-08	yes
Cdkn2b	7.11	7.1	5.41	8.35	4.38814e-08	yes
Klf12	0.26	0.37	0.28	0.22	4.6482e-08	yes
Arhgap45	1.98	2.3	5.38	7.99	4.81885e-08	yes
Trim6	1.37	2.04	1.38	1.7	5.18574e-08	yes
Ldlr	9.44	6.82	4.67	9.36	5.22316e-08	yes
Mmp15	121.29	107.97	92.14	87.85	5.3057e-08	yes
Notch2	17.68	21.26	23.3	30.36	5.35971e-08	yes
Dapl1	0.9	1.68	7.86	4.29	5.90194e-08	yes
Itgb4	21.06	23.7	18.72	28.24	6.0459e-08	yes
Tgfbr3	1.6	1.63	1.65	1.98	6.49787e-08	yes
Npnt	8.78	8.69	12.8	6.83	6.59047e-08	yes
Gpr137b	4.1	3.43	3.86	5.14	6.59047e-08	yes
Chsy3	1.15	1.18	0.71	1.78	6.6246e-08	yes
Grin2d	0.27	0.19	0.21	0.4	6.80099e-08	yes
Agpat2	9.65	7.9	20.76	13.23	6.90476e-08	yes
Gpa33	17.1	22.13	26.76	22.6	6.94117e-08	yes
Krt78	2.63	2.88	3.55	2.87	7.22145e-08	yes
Tmprss6	0.64	0.88	2.26	2.15	7.2366e-08	yes
Evpl	9.74	9.04	8.52	10.91	7.8894e-08	yes
Lcn2	91.53	92.49	99.04	56.47	7.90765e-08	yes
Efnb2	17.29	27.69	27.95	27.05	8.01112e-08	yes
Sva	18.05	163.8	0	0.05	8.03912e-08	yes
Prodh	0.87	1.4	1.83	1.83	8.24049e-08	yes
Atrn	16.84	27.31	23.45	25.57	8.25957e-08	yes
Mecom	3.21	6.84	4.2	5.15	8.42409e-08	yes
Inmt	5.46	7.12	6.04	6.37	8.54646e-08	yes
Oplah	4.24	5.3	5.84	7.36	8.5485e-08	yes
Tyro3	26.04	18.11	19.27	14.92	8.84793e-08	yes
Tgif1	8.46	9.65	9.94	9.5	8.88994e-08	yes
Nek6	4.85	3.29	3.51	1.87	9.05633e-08	yes
Cttn	58.12	53.47	60.26	58.54	9.08076e-08	yes
Fmnl1	1.71	1.57	3.26	4.31	9.34253e-08	yes
Crocc2	0.11	0.09	0.48	0.61	9.7983e-08	yes
Timp1	7.92	11.64	15.11	27.48	9.92916e-08	yes
Srgap1	3.37	4.25	2.57	2.53	1.01932e-07	yes
Krba1	2.6	2.24	2.72	5.42	1.03641e-07	yes
Cux2	0.09	0.13	0.07	0.04	1.03641e-07	yes
Phldb2	5.35	4.7	5.51	6.34	1.078e-07	yes
Ccn2	13.16	20.2	18.13	46.08	1.08277e-07	yes
Fgd3	2.12	2.56	3.12	3.1	1.09328e-07	yes
Timp2	88.35	83.53	99.77	70.68	1.11944e-07	yes
Hcar2	2.86	4.79	7.66	2.81	1.15765e-07	yes
Arpc1b	40.97	38.59	43.58	42.34	1.2062e-07	yes
Phf19	1.9	0.49	0.31	0.25	1.21979e-07	yes
Oas3	6.65	6.92	11.43	11.14	1.31734e-07	yes
Cxcl5	13.92	24.44	44.74	20.32	1.31734e-07	yes
Mertk	1.41	0.98	0.48	1.64	1.32196e-07	yes
Fignl2	1.52	1.9	2.52	4.5	1.34549e-07	yes
Cdx1	0.76	1.56	1.93	1.85	1.36152e-07	yes
Agps	10.53	14.93	7.01	7.88	1.4522e-07	yes
Il33	12.31	37.67	20.85	26.35	1.47487e-07	yes
Tspan33	2.23	2.36	3.34	3.24	1.52381e-07	yes
Xkr4	0.5	0.62	0.42	1.02	1.56836e-07	yes
Krt19	1344.9	1446.16	1446.29	949.48	1.61247e-07	yes
Igsf9b	1.02	1.64	1.43	1.98	1.61704e-07	yes
Tanc1	6.13	5.96	6.18	8.76	1.61704e-07	yes
Phgr1	7.85	7.84	7.63	12.22	1.71609e-07	yes
Eva1a	3.32	3.61	4.2	2.58	1.73497e-07	yes
Cmpk2	6.28	5.73	7.99	4.65	1.82752e-07	yes
Tlr5	5.89	6.25	5.61	8.7	1.83522e-07	yes
Mylip	33.11	18.04	39.05	33.08	1.90061e-07	yes
Fermt1	10.93	10.25	5.86	9.35	1.92228e-07	yes
St18	0.11	0.19	0.37	0.38	1.99417e-07	yes
Alas1	7.53	8.57	9.16	10.26	2.00176e-07	yes
Car9	4.4	5.66	3.15	3.86	2.06433e-07	yes
Styk1	1.95	2.24	1.24	1.13	2.08296e-07	yes
Slc30a2	0.81	1.95	0.36	0.27	2.08528e-07	yes
Tbc1d1	13.93	14.35	14.97	14.01	2.113e-07	yes
Bzw2	37.98	16.76	18.88	15.12	2.13144e-07	yes
Tff3	56.68	41.73	191.92	69.09	2.2195e-07	yes
Mta1	11.85	11.13	125.5	82.54	2.2283e-07	yes
Trim35	6.42	9.29	9.31	11.34	2.25035e-07	yes
Idh1	88.77	114.39	104.65	72.5	2.39731e-07	yes
Psme1	30.25	26.77	51.52	32.43	2.4188e-07	yes
H60c	0.43	0.71	0.47	0.54	2.42524e-07	yes
Sh3tc1	2.8	3.88	4.95	2.94	2.65725e-07	yes
Clca3b	0.39	0.55	0.2	0.37	2.67355e-07	yes
Mx2	1.48	1.25	1.86	8.95	2.7623e-07	yes
Zbtb7c	2.26	3.31	5.52	3.59	2.8587e-07	yes
Syngr1	2.62	2.5	8.58	5.45	2.89614e-07	yes
Tfrc	32.01	17.19	10.39	6.84	2.93762e-07	yes
Man1a	8.24	8.66	9.98	4.14	2.95245e-07	yes
S100a8	2.7	3.82	12.33	0	2.9569e-07	yes
Dock7	6.58	6.75	7.32	9.01	2.98189e-07	yes
Man2b2	26.64	26.07	28.55	26.02	2.98652e-07	yes
Abca1	25.24	33.56	39.5	25.41	3.12977e-07	yes
Cd300lf	0.32	0.58	2.09	1.1	3.20317e-07	yes
Ccl6	11.53	11.79	13.78	6.52	3.31226e-07	yes
Cyp4f40	0.47	0.58	0.17	1.46	3.57418e-07	yes
Eps8l1	4.01	3.08	4.77	3.37	3.62386e-07	yes
Muc5b	1.1	1.28	1.27	0.93	3.62386e-07	yes
Gsta3;Tmem14a	2.55	4.48	4.21	12.11	3.63567e-07	yes
Muc2	0.06	1.28	2.96	4.49	3.68846e-07	yes
Adamts1	5.58	8.04	9.66	7.93	3.91714e-07	yes
Clic1	103.24	94.8	78.89	68.29	3.93616e-07	yes
Galnt6	1.02	1.2	0.67	2.34	4.05464e-07	yes
Arhgap40	4.94	5.92	8.59	3.42	4.15252e-07	yes
Sptlc3	8.82	12.9	6.09	3.85	4.31573e-07	yes
Fut9	2.26	5.24	3.04	3.02	4.36078e-07	yes
Mx1	2.09	2.33	4.31	11.68	4.39013e-07	yes
Psg17;Psg19	0.68	0.96	0.85	0.95	4.41304e-07	yes
Tm4sf4	1.94	3.11	3.86	0.93	4.60463e-07	yes
C1qa	40.2	42.43	89.33	79.54	4.83453e-07	yes
Psca	99.04	136.6	106.96	63.87	4.97323e-07	yes
Gm4779	0	0	0.02	0	4.99628e-07	yes
Lgr4	59.19	67.86	42.24	32.21	5.06322e-07	yes
Unc93b1	13.46	12.59	15.13	25.48	5.06486e-07	yes
Cln3	3.72	3.64	5.99	7.43	5.20189e-07	yes
Hist1h1a	9.97	12.97	27.75	22.77	5.46185e-07	yes
Nfasc	0.43	1.04	0.58	1.36	5.60633e-07	yes
Pld2	5.99	5.52	7.05	8.42	5.69363e-07	yes
Col5a2	3.93	9.47	8.64	13.36	5.85601e-07	yes
Hoga1;4933411K16Rik	3.57	2.7	2.77	4.2	6.02149e-07	yes
Stat3	20.14	17.84	24.67	22.4	6.03673e-07	yes
Lgals4;Ech1	34.52	33.83	35.42	36.81	6.18557e-07	yes
Nav2	3.08	3.76	4.67	10.16	6.23314e-07	yes
Nrarp	4.88	7.07	5.07	8.6	6.28785e-07	yes
Slc5a3;Mrps6;Gm49711	3.89	4.53	2.48	3.9	6.53848e-07	yes
Slfn8	1.78	3.52	2.82	0.87	6.59358e-07	yes
Kifc3	6.17	4.41	8.11	12.07	6.5948e-07	yes
Ier3	21.93	19.77	11.89	23.84	6.64403e-07	yes
D630045J12Rik;Atp6v0a4	1.3	1	1.37	2.24	6.79061e-07	yes
Limch1	3.46	2.88	3.27	3.18	7.01432e-07	yes
Foxq1	13.63	17.15	14.28	14.4	7.05269e-07	yes
Rhou	73.51	42.63	18.6	14.85	7.07454e-07	yes
Myo9b	6.59	6.92	7.62	10.58	7.21499e-07	yes
Ttr	20.31	20.37	17.31	2.7	7.23106e-07	yes
Rxra	18.53	20.19	26.08	25.44	7.30976e-07	yes
Eno1	83.81	58.61	33.9	27.36	7.32946e-07	yes
Lmnb1	5.42	5.57	6.85	10.29	7.59e-07	yes
Myb	0.97	1.13	1.37	2.14	7.94451e-07	yes
Igfbp7	51.23	62.84	119.38	176.13	8.01052e-07	yes
Hsh2d	0.75	1.31	0.77	4.7	8.0653e-07	yes
Pycr1	3.56	3.62	1.71	0.72	8.12102e-07	yes
Dock2	1.61	1.55	1.74	4.69	8.27599e-07	yes
Grip1	0.77	1.08	0.98	1.67	8.27599e-07	yes
Slc43a2	21.91	15.47	13.11	7.97	8.30824e-07	yes
Agrn	22.09	25.24	32.8	54.43	9.2262e-07	yes
Zfp608	4.65	3.86	5.93	5.9	9.24808e-07	yes
Spire1	2.14	3.25	0.5	0.82	9.33439e-07	yes
Gramd3	2.31	3.01	1.82	2.08	9.3626e-07	yes
Stab1	3.95	4.72	7.38	12.46	9.4692e-07	yes
Slc25a10	16.44	16.37	17.17	23.11	9.92507e-07	yes
Pde7a	7.21	8.13	6.35	6.73	1.00223e-06	yes
Inpp5d	1.56	1.9	4.02	4.3	1.00223e-06	yes
Ptprc	2.16	2.32	2.08	3.74	1.01618e-06	yes
Mvp;Prrt2;Pagr1a;Gm42742	12.25	12.95	13.24	11.56	1.03676e-06	yes
Cdkn2a	6.46	3.48	0.7	5.77	1.05764e-06	yes
Gpld1	7.31	5.08	1.94	2.22	1.06774e-06	yes
Aldob	0.96	1.54	4.29	1.96	1.1083e-06	yes
Hepacam2	3.13	4.16	3.75	1.3	1.11608e-06	yes
Sult1b1	3.6	3.28	1.72	1.26	1.13033e-06	yes
Urah	15.55	11.88	21.09	14.38	1.13136e-06	yes
Rab27a	16.33	19.56	15.91	11	1.14897e-06	yes
Tmsb10	4.71	4.85	36.9	29.88	1.19729e-06	yes
Pml	7.82	6.27	8.09	10.83	1.21938e-06	yes
Slc16a10	2.38	0.91	1.13	0.56	1.22241e-06	yes
Gsdmd	9.39	9.68	12.59	15.78	1.24118e-06	yes
Abca5	5	3.33	2.15	1.66	1.25156e-06	yes
Slc4a7	18.44	17.81	19.4	9.54	1.29601e-06	yes
Snx31	0.74	1.99	1.35	2.92	1.30178e-06	yes
Nlrc5	3.29	3.25	1.32	4.71	1.33746e-06	yes
Kcnq1	7.6	12.92	17.91	22.21	1.34742e-06	yes
Tagln2	78.07	67.59	84.2	52.39	1.36519e-06	yes
Acox2	0.57	0.46	0.09	0.92	1.39905e-06	yes
Trim30d	5.47	5.14	5.09	1.25	1.41965e-06	yes
Sik1	12.45	16.34	16.92	18.62	1.43764e-06	yes
Frzb	2.52	5.43	1.56	7.51	1.43764e-06	yes
Lrrc31	14.95	6.15	9.53	11.77	1.47847e-06	yes
Piezo1	6.82	8.17	6.59	11.34	1.49209e-06	yes
Kctd14	6.13	7.78	2.02	2.23	1.51261e-06	yes
Samd9l	23.66	36.39	15.39	14.85	1.52402e-06	yes
Myo18a	5.91	6.05	8.14	12.15	1.53812e-06	yes
Zfp750	8.12	8.94	16.22	10.58	1.66978e-06	yes
C77080	25.61	31.45	38.23	50.09	1.73754e-06	yes
Nfkbie	3.76	3.31	7.26	2.91	1.74745e-06	yes
Zfp710	5.11	8.27	8.55	13.33	1.74745e-06	yes
Atp6v1c2	2.98	2.45	4.66	1.94	1.80678e-06	yes
Slc35g1	12.86	25.4	8.03	9.67	1.86373e-06	yes
Itpr3	24.67	25.43	30.44	33.59	2.00492e-06	yes
Slc18a1	1.06	0.72	0.72	1.45	2.04259e-06	yes
Ttyh2	3.96	4.62	7.8	8.06	2.04259e-06	yes
Cd68	6.79	7.64	20.68	11.57	2.04847e-06	yes
Clec4e	0.06	0.2	0.38	0.09	2.09952e-06	yes
Basp1	38.82	47.51	48.1	8.89	2.19001e-06	yes
Cd276	4.45	7.03	2.68	5.75	2.2019e-06	yes
Cd300ld	1.23	1.38	3.32	2.41	2.20242e-06	yes
Zfp697	2.72	1.44	0.5	0.87	2.30454e-06	yes
Slc16a3	2.52	2.38	3.23	1.26	2.36478e-06	yes
Acer3	6.35	5.18	3.82	2.6	2.38068e-06	yes
Krt17;Krt14	19	25.63	18.56	24.45	2.42476e-06	yes
Plxnb2	48.42	54.45	60.16	63.02	2.46024e-06	yes
Wif1	3.63	5.47	3.74	6.08	2.46805e-06	yes
Herc6	1.62	1.98	1.88	2.71	2.46805e-06	yes
Smim6	8.84	14.38	6.06	21.34	2.47292e-06	yes
Sorcs2	4.24	6.23	3.72	11.24	2.53374e-06	yes
Tpm3	27.42	29	43.12	37.99	2.56436e-06	yes
Tmem176a	39.68	34.34	59.05	53.92	2.57471e-06	yes
S100a9	1.78	1.54	16.45	0	2.58694e-06	yes
Rai1	2.37	2.65	3.76	10.26	2.61239e-06	yes
Shisa5	71.49	68.26	88.12	46.4	2.69731e-06	yes
Slc22a1	7.43	3.2	5.28	4.88	2.71431e-06	yes
Plscr3	8.35	7.45	7.26	9.08	2.76798e-06	yes
Msmb;Ncoa4	9.06	6.34	7.68	9.52	2.82997e-06	yes
Rnaset2b;Gm1604a	10.63	11.44	9.66	8.52	2.87452e-06	yes
Ccdc34	1.57	1.63	1.85	2.06	2.89477e-06	yes
Defb1	36.18	115.53	19	4.06	2.8953e-06	yes
Dennd2d	16.73	16.24	10.52	14.27	2.92074e-06	yes
Sh2d7	0.35	1.26	3.11	1.95	2.96432e-06	yes
S100a16	27.08	65.94	70.04	57.52	2.99939e-06	yes
Mgp	58.29	86.54	104.23	130.4	3.0616e-06	yes
Sp140	2	1.38	2.31	5.24	3.1675e-06	yes
Por	53.31	62.05	70.99	59.62	3.18888e-06	yes
Pfkp	2.07	1.73	2.39	2.81	3.1903e-06	yes
Wnt7a	0.26	0.17	0.32	0.27	3.19243e-06	yes
Col14a1	3.96	8.85	7.91	9.81	3.25057e-06	yes
Smgc	9.65	9.37	17.49	6.74	3.36968e-06	yes
Ccl9	5.46	7.13	6.52	2.93	3.4477e-06	yes
Lrrfip1	25.32	22.84	19.77	22.51	3.46835e-06	yes
Colgalt1	29.98	16.87	36.31	29.36	3.4738e-06	yes
Bmp1	3.7	5.63	5.5	10.23	3.55448e-06	yes
Racgap1	0.97	0.96	1.22	1.47	3.60736e-06	yes
Eml4	25.76	27.81	18.56	16.6	3.60986e-06	yes
Dnajc22	2.8	2.76	0.86	2.29	3.61809e-06	yes
Capn13	16.5	16.46	13.05	24.68	3.63194e-06	yes
Aldh1l2	0.55	1.96	0.44	0.29	3.78246e-06	yes
H2-Ab1	26.37	34.76	19.32	58.71	3.83375e-06	yes
Tnfrsf23	2.92	2.87	2.86	3.59	3.86386e-06	yes
Mgam	0.97	2.02	0.89	0.56	3.93892e-06	yes
Myo1e	14.13	14.31	15.3	17.28	3.96845e-06	yes
Slc4a2	7.57	9.01	9.72	12.49	3.98316e-06	yes
Krt8	399.71	303.69	581.67	397.29	4.04115e-06	yes
Nptxr;Cbx6;Npcd	23.81	12.42	7.22	8.98	4.05342e-06	yes
Cp	14.58	14.26	25.39	9.81	4.08444e-06	yes
Plxna1	11.99	10.94	12.08	18.83	4.08839e-06	yes
Inhbb	5.11	7.03	3.6	4.08	4.10918e-06	yes
Net1	29.04	40.58	22.66	17.7	4.13352e-06	yes
Pstpip2	9.49	9.56	9.31	11.48	4.15232e-06	yes
Aldh2	16.36	12.67	10.13	11.58	4.15575e-06	yes
Kcnip1	0.05	0.17	0	0	4.20689e-06	yes
Nkx3-1	8.09	3.09	7.36	1.69	4.25142e-06	yes
Baz1a;Gm20403	5.27	4.44	4.41	6.46	4.34177e-06	yes
Adarb2	0.07	0.03	0.1	0.05	4.37864e-06	yes
Lamc2	32.3	24.4	19.34	20.67	4.37875e-06	yes
Slc15a3	0.99	0.91	3.26	1.39	4.44528e-06	yes
Mbp	14.81	15.36	14.84	12.96	4.58884e-06	yes
Fblim1	4.03	6.67	6.2	5.55	4.61618e-06	yes
Pak1	17.41	14.4	15.27	14.05	4.68106e-06	yes
Vtcn1	24.58	31.41	30.16	29.39	4.83767e-06	yes
Lonrf3	5.29	4.34	1.97	4.9	4.851e-06	yes
Eif2ak2	15	12.51	9.99	9.39	4.88727e-06	yes
Slc30a10	0.09	0.06	0	0	4.88727e-06	yes
Gprc6a	0	0	0	0	4.92365e-06	yes
Kalrn	0.83	1.22	1.73	3.01	4.97646e-06	yes
Midn	17.25	18.07	22.11	23.24	5.07217e-06	yes
Stard3	22.32	23.4	24.28	31.08	5.11799e-06	yes
Gbp4;Gbp9;Gbp8	1.46	1.56	0.81	2.34	5.12664e-06	yes
Gm7714	2.65	3.27	157.65	8.56	5.18409e-06	yes
Casp12	7.08	7.32	3.71	3.28	5.19758e-06	yes
Nefh	35.41	152.92	0.86	16.95	5.23066e-06	yes
AW551984	0.33	0.7	0.9	1.09	5.3873e-06	yes
Lrmp	0.78	0.88	1.56	3.14	5.41372e-06	yes
Muc4	0.23	0.87	0.99	1.11	5.43251e-06	yes
Cd38	3.22	5.03	3.63	5.16	5.49873e-06	yes
Vnn1	1.59	2.44	5.56	1.37	5.52697e-06	yes
Cxcl14	27.12	48.65	28.87	97.36	5.58732e-06	yes
Greb1l	2.26	1.05	1.11	1.15	5.65687e-06	yes
Plekhb2	32.36	31	23.94	24.78	5.65739e-06	yes
Clec5a	1.06	1.13	2.92	0.49	5.71768e-06	yes
Ambp	0.29	0.95	2.71	2.88	5.78062e-06	yes
Irak2	5.04	10.97	10.77	9.85	5.84865e-06	yes
Insm1	0.01	0.09	0.21	1.38	6.01271e-06	yes
2610528A11Rik	2.94	0.53	6.01	0	6.06893e-06	yes
Resf1	9.8	12.94	2.64	8.29	6.10443e-06	yes
Rara	6.16	5.76	8.31	8.23	6.35057e-06	yes
Pcolce;Fbxo24	3.48	6.37	8.03	16.1	6.43328e-06	yes
Ifit2	9.27	7.25	5.38	7.44	6.45488e-06	yes
Irf1	15.62	12.19	14.58	14.52	6.45488e-06	yes
Wdfy4	1.46	1.46	1.74	3.49	6.57883e-06	yes
Yipf6	33.16	25.8	15.3	9.49	6.57883e-06	yes
Pilrb2	0.66	0.68	1.44	2.91	6.59137e-06	yes
Sprr1a	74.91	29.25	45.69	6.51	6.91805e-06	yes
Syk	1.63	1.92	2.52	1.71	7.03864e-06	yes
Apol9a	2.25	1.42	3.39	3.34	7.16344e-06	yes
Mical2	2.33	2.48	3.27	5.6	7.20184e-06	yes
Fgfr3	1.6	3.13	3.88	4.36	7.20184e-06	yes
Wfdc18	90.37	27.69	95.95	17.01	7.58312e-06	yes
Myt1	0.11	0.04	0.21	0.17	7.59036e-06	yes
BC025446	6.58	7.44	5.77	0.71	7.59036e-06	yes
S100a10	53.08	46.86	48.97	25.96	7.79051e-06	yes
Cotl1	24.63	23.08	30.95	27.77	8.10587e-06	yes
Cntnap5b	0.03	0.03	0.31	0.42	8.14541e-06	yes
Csnk1e	3.2	3.2	5.82	7.39	8.23729e-06	yes
Mal2	65.52	54.29	34.22	18.66	8.25898e-06	yes
Ppl	6.36	7.23	12.97	13.96	8.25898e-06	yes
Tmem132a	7.1	8.28	5.15	5.73	8.26222e-06	yes
Arhgef4	4.44	4.73	4.94	3.19	8.35163e-06	yes
Zfp618	4.63	4.08	1.69	2.58	8.49325e-06	yes
Gm45717;Ifitm2;Ifitm5	31.42	35.25	58.41	36.43	8.53811e-06	yes
Clic6	4.31	8.01	7.37	6.69	8.60486e-06	yes
Tap1	6.58	6.05	4.55	15.76	8.72624e-06	yes
Rbms1	10.97	13.26	6.56	6.99	8.83379e-06	yes
Lzts2	18.58	17.55	28.45	23.59	8.8951e-06	yes
Slfn9	4.86	7.06	5.67	6.24	9.1178e-06	yes
Nfkb2	12.97	12.78	12.79	15.72	9.31619e-06	yes
Fcgr4	1.58	1.78	1.56	2.89	9.52565e-06	yes
Tbc1d2b	6.96	9.81	9.09	9.37	9.81645e-06	yes
Bst2	20.28	17.96	28.93	27.88	9.85133e-06	yes
Clrn3	1.05	0.95	0.72	0.26	1.00581e-05	yes
Fndc1	3.64	6.19	2.73	4.95	1.00927e-05	yes
Flnb	75.51	87.61	85.91	82.01	1.04031e-05	yes
Hist2h2aa2	4.27	0.97	47.88	3.34	1.04434e-05	yes
Sirpb1c;Sirpb1b;Sirpb1a	0.34	0.31	0.28	0.7	1.04434e-05	yes
Dsc1	0.04	0.02	0	0	1.04434e-05	yes
Ptger3	1.66	2.36	1.68	3.23	1.05163e-05	yes
Car2	115.93	154.86	164.37	145.43	1.0788e-05	yes
Bhlha15	19.43	15.89	9.39	4.19	1.11988e-05	yes
Leprot	8.39	9.39	23.68	19.33	1.13161e-05	yes
Lrrc26	43.79	46.97	34.56	38.14	1.14887e-05	yes
Fam13a	3.12	2.94	1.97	2.33	1.1587e-05	yes
Entpd8	3.38	3.17	2.46	9.85	1.17883e-05	yes
Ldhd	7.84	11.97	5.92	9.04	1.19859e-05	yes
Dnpep	15.94	13.9	23.55	23.4	1.21254e-05	yes
Afap1	6.35	6.72	6.55	9.01	1.2233e-05	yes
Rcor2	1.17	1.06	3.14	1.45	1.22512e-05	yes
Tmem8	4.05	5.06	6.69	11.27	1.22575e-05	yes
Cdhr5	3.98	5.43	6.66	3.43	1.2319e-05	yes
Fbln2	5.78	11.44	7.85	23.45	1.2825e-05	yes
Myo7b	1.87	2.43	1	3.51	1.29431e-05	yes
Sox1	0.05	0.16	0.86	1.68	1.34387e-05	yes
Xirp2	0.1	0	0	0	1.35279e-05	yes
Manba	10.58	9.82	7.29	5.8	1.36045e-05	yes
Ces1f	1.39	2.49	1.51	2.34	1.36541e-05	yes
Agfg2	12.3	10.3	15.84	13.73	1.36957e-05	yes
Plcl2	5.46	5.17	4.75	7.77	1.41318e-05	yes
Fgl1	0.56	0.2	0.79	0.26	1.41976e-05	yes
Duxbl1	0.26	0.18	0.51	0.31	1.42814e-05	yes
Ltbp1	2.85	6	2.91	5.89	1.4462e-05	yes
Col5a1	2.8	8.68	5.74	9.54	1.4597e-05	yes
Car1	1.93	3.17	0	0	1.48087e-05	yes
Gria1	0.13	0.12	0.01	0	1.4919e-05	yes
Olfm4	2.28	9	75.55	16.81	1.49896e-05	yes
Hsd11b1	2.04	2.25	2.43	5.74	1.52532e-05	yes
Adcy7	2.74	2.17	2.79	8.26	1.53108e-05	yes
Atf6	12.73	11.81	5.34	3.9	1.57699e-05	yes
4930402H24Rik	5.05	6.02	5.47	6.45	1.60975e-05	yes
Trim31	5.56	2.88	3.25	3.83	1.61732e-05	yes
Frem2	0.62	1.14	5.01	4.03	1.67713e-05	yes
Lgals12	1.96	2.31	4.94	4.25	1.69228e-05	yes
Alpk1	3.61	3.24	1.3	2.64	1.69387e-05	yes
Cxcr4	6.16	4.53	12.71	7.63	1.70032e-05	yes
Nck2	9.04	6.74	11.55	9.23	1.72015e-05	yes
Hpse	2.03	2.94	2.09	2.78	1.74781e-05	yes
Cadm1	5.71	5.67	11.65	9.32	1.7659e-05	yes
Fbrsl1	5.78	4.92	7.24	14.87	1.84911e-05	yes
Agt	2.02	1.46	4.06	2.97	1.85535e-05	yes
Tpm4	70.01	82.51	64.32	39.46	1.90407e-05	yes
Muc2	0.25	1.42	1.98	2.76	1.91802e-05	yes
Gbp3	4.19	4.33	3.61	5.47	1.93727e-05	yes
Xaf1	2.04	1.64	2.68	3.36	1.98913e-05	yes
Mettl7b	0.46	0.55	1.96	1.02	1.99241e-05	yes
Capn5	26.01	37.13	35.33	29.28	2.00578e-05	yes
Cgn	8.12	8.14	9.48	15.94	2.01979e-05	yes
Tnik	1.78	2.14	1.98	2.75	2.03125e-05	yes
Mov10	6.11	5.87	5.63	8.06	2.06837e-05	yes
Cyth4	2.21	2.27	2.91	5.57	2.12366e-05	yes
Ldlrad4	3.93	3.98	4.02	6.51	2.14696e-05	yes
Hnf1a	0.32	0.26	0.09	2.58	2.15272e-05	yes
Mcemp1	0.22	0.35	1.55	1.67	2.15344e-05	yes
Dhcr24	31.09	16.31	13.39	19.12	2.15344e-05	yes
Rapgefl1	2.98	2.89	5.79	6.71	2.17292e-05	yes
Cd74	78.83	91.81	126.16	301.25	2.17292e-05	yes
Tmem254c	62.49	47.68	10.05	10.65	2.18215e-05	yes
Ccr5	1.65	2.17	0.89	1.93	2.193e-05	yes
Brinp1	0.11	0.25	0.1	0.67	2.23323e-05	yes
Tmed3	50.13	62.01	27.55	19.15	2.27529e-05	yes
Chst8	0.47	0.81	1.75	1.31	2.27529e-05	yes
Best2	0.3	0.4	4.33	3.06	2.28309e-05	yes
Tmem236	1.01	1.82	0.87	0.77	2.30368e-05	yes
BC100530	4.32	0.41	1.18	0	2.30949e-05	yes
Pi16	3.49	7.96	3.47	8.67	2.31385e-05	yes
Slc6a8	19.84	18.16	14.19	15.75	2.34871e-05	yes
Mthfd2	3.26	5.74	1.25	1.33	2.38158e-05	yes
Ifih1	11.78	8.62	7.92	8.03	2.39191e-05	yes
Mmp2	8.73	25.66	16.82	39.51	2.40302e-05	yes
Fbln1	6.68	12.48	9.27	21.83	2.41471e-05	yes
St8sia3	0.08	0.08	0.26	0.11	2.45609e-05	yes
Znrf1	3.56	3.97	3.53	7.2	2.53175e-05	yes
Pkhd1	4.84	5.07	2.89	6.35	2.5413e-05	yes
Ift20	13.11	10.68	8.9	9.59	2.54921e-05	yes
Anpep	57	48.7	44.14	46.85	2.62353e-05	yes
Crybg1	37.16	33.14	35.5	40.12	2.64336e-05	yes
Rgs9bp	0.26	0.45	0.27	0.96	2.66441e-05	yes
Ms4a10	2.11	2.8	4.25	7.12	2.7085e-05	yes
Cxcl2	6.11	3.98	6.4	4.31	2.7171e-05	yes
Foxp4	12.13	10.27	18.52	26.18	2.74524e-05	yes
Meis2	2.5	4.91	1.98	5.14	2.80275e-05	yes
Nav3	0.4	0.48	0.65	0.41	2.84929e-05	yes
Dsc3	3.36	7.1	1.11	1.09	2.86453e-05	yes
Slc25a30	20.38	7.37	5.02	12.68	2.91864e-05	yes
Smad2	3.7	4.1	6.21	6.63	2.93531e-05	yes
Srd5a1	7.32	8.68	2.75	4.86	2.96374e-05	yes
Serinc5	24.65	17.55	15.76	10.53	3.00766e-05	yes
Kcnn4	7.73	11.9	5.79	7.36	3.01143e-05	yes
Plcg1	8.86	7.93	9.44	16.43	3.10121e-05	yes
Tmcc3	31.54	18.19	7.85	7.03	3.15415e-05	yes
Cxcl11	0.06	0.15	0.08	0.77	3.15907e-05	yes
Flt3	0.16	0.13	0.35	1.24	3.21237e-05	yes
Egfr	11.19	13.94	9.14	11.94	3.23564e-05	yes
Olfr829	0	0	0	0	3.26546e-05	yes
Ptk7	4.85	8.27	7.27	10.78	3.27456e-05	yes
St8sia2	0.07	0.09	0	0	3.33329e-05	yes
Clu	715.81	839.26	982.02	769.55	3.40264e-05	yes
Serping1	17.67	27.29	46.79	81.03	3.4709e-05	yes
Fbn1	5.14	14.08	7.44	12.56	3.47208e-05	yes
Tlr4	15.17	13.68	6.39	4.92	3.4946e-05	yes
Myh1;Myh2	0.23	0.01	0.04	0	3.54839e-05	yes
Adgrf4	5.06	3.9	0.68	1.82	3.55746e-05	yes
Cdkn1a	13.27	15.71	4.46	5.61	3.55988e-05	yes
Plbd1	5.83	5.06	7.58	7.7	3.57806e-05	yes
Irgm1	13.35	12.64	10.47	11.28	3.58927e-05	yes
Ophn1	2.84	2.5	1.67	2.95	3.62748e-05	yes
Mmp23	1.88	3.48	4.04	5.51	3.62842e-05	yes
Rhbdf2	4.48	4.75	6.65	5.11	3.65365e-05	yes
Arhgef28	8.41	5.34	6.37	6.91	3.67527e-05	yes
Tmem56	12.65	5.88	1.57	1.73	3.67968e-05	yes
Cyp51	18.29	14.85	10.78	7.85	3.68685e-05	yes
Oaf	3.45	5.34	2.75	7.1	3.75142e-05	yes
Cdhr1	0.55	0.17	0.58	0	3.80525e-05	yes
Mcm6	10.27	9.08	3.6	5.43	3.80752e-05	yes
Slc7a8	1.15	2.01	0.29	1.25	3.8111e-05	yes
Mdfic	3.24	4.09	3.96	5.02	3.81903e-05	yes
Sox13	6.08	4.57	6.69	10.58	3.82146e-05	yes
Pcsk1	0.08	0.64	0.58	1.89	3.86088e-05	yes
Apod	13.66	16.35	23.48	21.15	3.86204e-05	yes
Cyp2d34	0.9	0.83	0.22	0.28	3.87966e-05	yes
Fut4	13.09	14.42	6.2	10.15	3.90823e-05	yes
Gde1	42.29	48.68	40.79	41.32	3.90823e-05	yes
Hk1	14.55	11.71	14.48	12.17	3.90823e-05	yes
Dio1	2.53	2.56	1.99	0	3.92065e-05	yes
Cyp2c65	0.21	1.4	2.44	0	3.92065e-05	yes
Clca3a1;Clca3a2	3.1	2.58	4.57	3.37	3.96062e-05	yes
Tmem252	1.39	4.47	1.12	2.17	3.96353e-05	yes
Ces2g;Ces2a	4.45	7.3	2.56	4.74	4.09214e-05	yes
Gm43302;Gbp10;Gbp6;Gbp11	1.24	0.85	1.21	1.68	4.10085e-05	yes
Pstpip1	0.69	0.93	1.7	1.79	4.12704e-05	yes
Znfx1	22.53	25.19	24.74	24.24	4.22295e-05	yes
Fgr	0.76	0.84	1.13	2.02	4.24004e-05	yes
Pygb	196.63	143.8	148.18	135.15	4.28367e-05	yes
Ecscr	2.08	2.53	7.01	4.86	4.33203e-05	yes
Capsl	4.06	5.25	8.46	2.31	4.36147e-05	yes
Themis3	0.96	0.9	0.66	0.66	4.46394e-05	yes
Zc3h12d	4.85	4.26	2.66	2.05	4.48152e-05	yes
Col1a1	27.23	90.34	55.36	137.45	4.6739e-05	yes
Nkd1	0.34	0.56	0.19	1	4.67702e-05	yes
Casp4	3.77	3.04	3.22	1.9	4.68564e-05	yes
Stap2	24.19	15.73	22.59	31.43	4.80096e-05	yes
Myadm;Prkcg	13.49	17.35	12	13.54	4.89149e-05	yes
Ano1	57.32	36.62	42.8	35.2	4.95939e-05	yes
Gstt1	15.71	10.79	33.38	24.56	4.98843e-05	yes
Ddah1	1.28	2.85	0.48	1.9	5.01981e-05	yes
Tmem108	0.28	0.36	0.4	0.9	5.13119e-05	yes
Arhgap28	3.8	2.87	1.43	1.83	5.22828e-05	yes
Tsc22d4	7.65	6.63	14.41	16.75	5.34514e-05	yes
Parm1	32.81	21.93	20.51	16.03	5.49753e-05	yes
Krt6b;Gm5414	0.05	0.32	0.38	1.18	5.51549e-05	yes
Calcb	1.08	2.06	1.5	0.67	5.64104e-05	yes
Homer2	3.56	3.71	4.99	3.96	5.67048e-05	yes
Gvin1	1.37	1.78	1.55	2.45	5.67389e-05	yes
Atg9b	0.37	0.47	0.3	3.83	5.71225e-05	yes
Lipa	3.51	3.82	4.17	3.26	5.71446e-05	yes
Psmb9	6	3.96	7.2	6.27	5.73114e-05	yes
Pdia6	53.74	47.96	33.94	32.61	5.73114e-05	yes
Kif26b	1.24	2.69	1.43	3.42	5.74491e-05	yes
Runx2	2.73	3.01	0.98	4.29	5.78205e-05	yes
Cbr2	944.87	1033.24	1122.37	879.09	5.80385e-05	yes
Ece1	9.4	15.29	16.91	21.35	5.86461e-05	yes
Fcer1g	7.66	6.45	14.62	16.68	5.8853e-05	yes
Errfi1	21.64	23.48	18.24	18.6	5.89498e-05	yes
Pde3b	6.24	10.29	5.3	4.45	5.9589e-05	yes
Cdca7	5.15	6.21	4	4.86	6.00832e-05	yes
Sh3rf1	14.08	16.8	15.01	20.32	6.02479e-05	yes
Macrod1	6.73	4.4	3.5	5.67	6.02479e-05	yes
Atrnl1	9.55	12.07	10.9	14.6	6.07614e-05	yes
Bcar1	6.71	6.32	9.38	12.9	6.14201e-05	yes
Aqp2	0.44	1.16	1.54	0.93	6.22719e-05	yes
Abca15	0.3	0.11	0.49	0.04	6.34082e-05	yes
Aldh7a1	10.05	11.16	4.71	3.08	6.4387e-05	yes
Tmem47	1.45	2.3	0.26	0.98	6.47383e-05	yes
Tnfaip8	3.82	4.66	4.22	3.32	6.48306e-05	yes
Mfap5	4.93	9.63	3.78	6.44	6.54181e-05	yes
Arrdc4	32.13	16.19	18.12	21.24	6.60228e-05	yes
Usf3	4.43	7.87	6.62	6.42	6.64602e-05	yes
Srebf1	20.4	19.03	33.01	33.45	6.7641e-05	yes
Ralb	12.25	12.62	14.44	11.63	6.79666e-05	yes
Ppp1r9a	2.93	4.75	2.67	4.86	6.82888e-05	yes
Trim34a;Trim34b	5.47	5.44	3.56	3.75	6.83022e-05	yes
Ltb	2.02	2.98	4.61	6.49	6.98947e-05	yes
Vangl1	5.59	4.6	6.64	3.44	7.04389e-05	yes
Plpp2	48.34	41.17	40.5	31.56	7.04389e-05	yes
Ifi213	0.31	0.4	0.11	0.29	7.19325e-05	yes
Sbno2	12.26	7.46	9.83	21.55	7.22845e-05	yes
Slc39a8	117.81	80.42	120.78	50.15	7.44191e-05	yes
Chd7	3.75	2.24	4.37	5.52	7.46043e-05	yes
C1qc	12.48	13.05	25.49	19.13	7.48621e-05	yes
Ccdc148	0.57	1.2	0.94	2.15	7.60509e-05	yes
B3galt2	4.12	4.6	3.5	3.85	7.66924e-05	yes
Agtr1a	5.67	2.32	1.67	2.47	7.79777e-05	yes
Svep1	1.54	3.75	3.17	5.43	7.81627e-05	yes
Cxadr	44.03	29.17	16.2	12.13	7.93257e-05	yes
Ikzf1	1.85	4.11	3.57	3.51	8.08948e-05	yes
Gad1	0.03	0.02	0.4	0.72	8.15002e-05	yes
Cebpb	5.43	3.14	18.06	17.38	8.40891e-05	yes
Cideb	1.22	1.42	1.82	1.14	8.41182e-05	yes
Ccr7	0.5	0.33	0.91	0.85	8.41225e-05	yes
Cfh	10.77	13.13	7.23	7.87	8.43764e-05	yes
Rbp1	9.17	10.9	10.92	9.04	8.50665e-05	yes
St3gal4	4.39	4.8	6.97	6.21	8.66913e-05	yes
Parp3	4.07	4.9	8.68	7.83	8.73811e-05	yes
Pbx1	11.17	11.18	9.11	12.04	8.89829e-05	yes
Mapkapk3	4.49	4.8	6.24	6.3	8.89876e-05	yes
Adamts15	1.71	3.17	2.97	2.09	9.01428e-05	yes
Stk11ip	3.45	3.33	3.38	6.65	9.02392e-05	yes
Msr1	0.63	0.52	1.02	0.87	9.08572e-05	yes
Jph4	0.18	0.12	0	0	9.18646e-05	yes
Itgb2	3.97	3.83	9.47	10.15	9.18646e-05	yes
Ibsp	1.37	0.03	0	0	9.30267e-05	yes
Hjurp	8.52	10.71	4.37	9.07	9.43515e-05	yes
Fabp1	0.54	1.2	6.31	0	9.68857e-05	yes
Mid1	6.17	5.3	6.14	12.91	9.76067e-05	yes
Tnfaip3	6.26	5.6	3.09	4.79	9.97904e-05	yes
Muc20	6.07	11.3	2.6	12.45	0.000101495	yes
Bid	4.37	3.87	5.05	4.27	0.000103701	yes
Atp12a	1.49	1.91	1.43	0.04	0.000105109	yes
Nos1	0.6	0.79	0.18	0.45	0.000105439	yes
Itgax	2.16	2.58	3.9	3.38	0.000105471	yes
Igfbp4	13.19	43.81	26.77	45.46	0.000107235	yes
Suox	10.55	17.03	8.39	5.3	0.000107507	yes
Mroh3	0.41	0.14	0.59	1.71	0.000107812	yes
Neurl3	9.66	8.61	7.57	2.46	0.000108502	yes
Vsig1	7.43	14.03	11.25	8.08	0.000109328	yes
Apol7a	3.01	2.93	4.01	2.85	0.000109389	yes
Csf1	4.31	5.23	8.58	6.67	0.000109761	yes
Creld2	8.29	7.39	8.2	14.59	0.000109815	yes
Mif	96.62	66.86	111.84	46.2	0.000110274	yes
Creg2	0.15	0.12	0.13	0	0.000111697	yes
Krt20	1.91	2.51	2.16	3.42	0.000111907	yes
Plekhg6	6.34	7.38	7.55	10.47	0.00011289	yes
Celsr2	5.65	7.03	6.34	7.03	0.000113381	yes
Jun	37.65	43.42	53.23	60.83	0.000114701	yes
Pygm	0.65	0.97	0.33	0.55	0.000115564	yes
Cdh1	432.2	408.69	271.36	241.78	0.000115585	yes
Pnpla7	2.57	2.68	4.34	5.75	0.000116347	yes
Greb1	0.11	0.22	0.1	0.01	0.000116553	yes
Klrg2	3.46	2.34	2.26	2.99	0.000119717	yes
Col3a1	22.75	66.8	69.16	85.94	0.000119747	yes
Cib1	26.25	19.18	22.28	20.92	0.00011987	yes
Tbc1d2	4.65	5.22	5.67	7.09	0.00011987	yes
Stim2	5.18	5.33	6.25	5.54	0.000120722	yes
Nabp1	3.24	2.28	2.7	2.32	0.000122255	yes
Cemip2	13.42	16.48	10.75	12.97	0.000124409	yes
Ctsb	101.7	113.75	119.84	67.73	0.000124661	yes
Gpnmb	2.3	5.18	5.41	1.74	0.000124679	yes
Pcyt1b	1.59	1.68	0.12	0.87	0.000124701	yes
Myo6	18.32	21.1	17.72	17.28	0.000125252	yes
Mki67	3.31	3.49	4.57	6.31	0.000128434	yes
Itgb8	7.26	7.03	5.14	3.09	0.000128882	yes
Pnliprp1	1.27	0.39	1.85	0.23	0.000130761	yes
Tap2	14.37	17.04	19.87	17.7	0.000130889	yes
Prag1	4.55	4.66	5.73	6.37	0.000130889	yes
Col1a2	11.19	36.79	30.99	58.67	0.000136389	yes
Wipf3	0.2	0.32	0.36	0.2	0.00013671	yes
Plcg2	11.4	13.76	19.84	19.46	0.000137675	yes
Kng2	0.38	0.91	0.25	2.02	0.000137839	yes
Tmem140	2.59	2.55	5.58	4.95	0.000138368	yes
Lrrc66	0.39	0.65	0	0.01	0.000139227	yes
Fam234a	20.48	19.59	17.38	14.64	0.000139227	yes
Rnf152	2.19	4.49	1.83	2.35	0.000139444	yes
Themis2	1.76	1.44	3.22	5.25	0.000141032	yes
Trp53i11	1.82	2.74	4.87	4.57	0.000142263	yes
Pld4	3.94	4.25	5.49	8.98	0.000142485	yes
Nfe2l3	14.68	14.17	14.62	8.63	0.000142657	yes
Fcgr1	1.83	1.59	1.2	4.25	0.000143907	yes
Cybb	4.34	4.03	3.91	4.32	0.000144474	yes
Pgr15l	0	0	0	0	0.000144516	yes
Dpp7	4.66	4.15	6.42	7.68	0.000145921	yes
G6pc2	0.07	0	0	0	0.000147748	yes
Klf3	17.57	20.3	15.14	17.38	0.00014799	yes
Slc37a1	3.61	3.43	3.28	5.74	0.0001486	yes
Cacna1b	0.05	0.11	0.15	0.65	0.000149503	yes
Gas2l1	4.36	4.77	5.14	5.85	0.000151483	yes
Cit	0.24	0.28	0.3	0.95	0.000152733	yes
Fam222a	0.26	0.2	0.17	0	0.000153102	yes
Rptn	0.16	0.16	0.1	0.22	0.000153116	yes
Ttn	0.39	0.2	0.02	0.31	0.000153116	yes
Pllp	26.54	33.65	37.54	33.33	0.000153205	yes
Synpo2	3.23	7.31	0.49	1.58	0.000153793	yes
Galnt3	22.9	19.85	10.28	12.46	0.000153858	yes
Ugt8a	0.86	1.49	0.67	1.11	0.000154523	yes
Ccl3	0.67	0.46	7.72	2.21	0.000154697	yes
Gpt2	7.32	6.53	7.32	9.46	0.000157377	yes
Coro1c	10.39	9.67	10.64	8.39	0.000158275	yes
Asap3	4.22	3.31	8.01	10.99	0.000158275	yes
Baiap2l1	12.81	14.17	13.65	21.59	0.000161853	yes
Dock10	0.72	0.92	0.85	1.86	0.000161853	yes
Frmd8	8.64	6.87	6.84	8.96	0.000163966	yes
Sntg1	0.1	0.13	0.04	0	0.000164114	yes
Kif21b	0.82	0.76	0.98	2.17	0.000165652	yes
Serpinb9b	0.31	0.71	0	0	0.000167485	yes
Kif19a	0.8	1.09	1.38	2.89	0.000171792	yes
Arrb1	14.05	19.71	4.38	7.48	0.000172052	yes
Heg1	2.24	4.31	5.03	4.7	0.000173771	yes
Mcc	5.64	7.11	5.01	5.7	0.000177515	yes
Orai2	5.02	4.13	4.74	5.4	0.000177814	yes
Jup	39.63	36.02	46.44	41.74	0.000177934	yes
Efna4	6.24	7.72	9.9	7.11	0.000179274	yes
Cytip	3.7	5.39	2.67	3.12	0.000179477	yes
Serinc2	97.58	73.19	69.94	61.43	0.000182351	yes
Il10rb;Ifnar2;Gm21970	7.61	7.48	8.06	7.6	0.000183475	yes
Ugt1a1;Ugt1a7c;Ugt1a6a;Ugt1a6b;Ugt1a5;Ugt1a10;Ugt1a9;Ugt1a8;Ugt1a2	3.18	7	5.11	5.06	0.000185091	yes
Inhba	2.21	3.36	1.17	1.38	0.000186582	yes
Susd4	3.02	4.08	1.3	4.1	0.000186582	yes
Nckap1l	4.52	3.61	4.47	7.16	0.000191128	yes
Fat1	54.02	56.16	53.95	58.06	0.000191232	yes
Nudt19	20.03	15.88	13.62	10.31	0.000191232	yes
Tut4	8.66	7.34	6.68	7.25	0.000191442	yes
Cxcl10	2.61	3.97	3.06	4.92	0.000192212	yes
Efhd2	44.84	41.14	37.92	31.39	0.000193584	yes
Bgn	32.69	44.16	33.57	68.15	0.000193584	yes
Metrnl	9.77	10.19	9.36	10.28	0.000194017	yes
Herpud1	37.63	35.28	29.32	29.74	0.000194371	yes
Akna	1.31	1.23	3.14	7.52	0.000194905	yes
Cxcl17;Lipe	5.96	7.3	12.65	10.23	0.000196243	yes
St8sia6	0.9	2.66	2.13	1.65	0.000199966	yes
Dip2a	3.94	3.58	4.62	4.23	0.000212436	yes
Apobec1	5.74	4.27	3.51	4.96	0.00021425	yes
Ccr2	3.09	2.34	2.48	3.97	0.000216485	yes
Stxbp5l	0.23	0.35	0.35	0.13	0.000217559	yes
Rnf149	17.71	22.24	17.5	7.7	0.000218496	yes
Lrrk1	13.09	11.14	10.63	14.98	0.000218496	yes
Ppp1r3a	0.14	0.04	0	0	0.00021937	yes
Bbox1	1.44	2.68	1.03	0.92	0.00022139	yes
Prdx5	34.38	21.3	59.55	43.87	0.000226067	yes
Erich3	0.02	0.01	0	0.01	0.00022633	yes
Cda	5.13	5.67	4.3	2.99	0.00022756	yes
Sh3bp2	5.17	5.83	6.43	4.77	0.00022789	yes
Azgp1	45.42	4.69	8.89	3.46	0.000228413	yes
Igfbp5	33.47	122.66	163.98	254.54	0.000229167	yes
Sqor	24.18	15.85	21.12	13.19	0.000229983	yes
Skap2	5.75	5.64	4.2	5.08	0.000233309	yes
4930412O13Rik	1.13	0.95	1.57	2.03	0.000235345	yes
Irf5	2.49	2.17	4.63	5.46	0.000235433	yes
Ppip5k1	2.9	2.67	3.58	4.76	0.000236705	yes
Grk3	7.91	9.33	7.62	14.48	0.000236832	yes
Zfp467	4.04	6.35	4.08	5.18	0.000238172	yes
Slc16a14	0.17	0.66	0.47	0.66	0.000238172	yes
Pik3cd	1.43	1.01	1.63	4.62	0.000251614	yes
Dbn1	2.76	3.52	5.59	6.56	0.000252737	yes
Rac2	2.37	2.38	7.17	6.61	0.000254628	yes
Olfr890	0.29	0.33	0.13	0.55	0.000256528	yes
Plin2	7.16	6.38	7.33	4.03	0.000257477	yes
Klk1	0.41	0.3	3.39	0.08	0.000258715	yes
Dnah5	0.1	0.17	0.19	0.12	0.000260609	yes
Vps35l	3.26	3.11	4.63	4.56	0.000261286	yes
Siglecf	0.37	0.76	2.04	0	0.000269659	yes
Fam84a	71.82	29.81	28.87	22.6	0.000269659	yes
Prr15l	40.25	35.86	28.17	29.58	0.000273916	yes
Fermt3	1.57	1.41	2.17	4.21	0.000273916	yes
Slc26a3	0.15	0.42	0.08	0	0.00027473	yes
Bcl2	3.7	5.48	3.38	5.18	0.000276337	yes
Asns	25.73	24.96	6.76	5.81	0.00027711	yes
E230025N22Rik	0.37	0.47	1.25	0.97	0.000280079	yes
Cd200r2	3.09	5.96	0	3.78	0.000280088	yes
Zfp185	13.04	13.19	13.84	9.95	0.000280334	yes
Ccr1	1.48	1.8	3.4	3.7	0.000281099	yes
Mrc2	2.06	4.07	2.82	7.59	0.000281099	yes
Map7d1	9.34	9.71	12.68	16.51	0.000284423	yes
Aebp1	6.57	13.98	12.48	22.73	0.000286217	yes
Fscn1	1.44	3.23	2.08	5.88	0.000288547	yes
Wnt7b	8.29	7.67	16.45	13.87	0.000291837	yes
Sdsl	0.51	0.67	0	0	0.000292949	yes
Esrra	8.9	8.25	8.43	14.04	0.00029453	yes
Ecm1	23.56	27.94	15.67	21.49	0.00029453	yes
Trpm2	0.19	0.19	0.75	0.6	0.00030341	yes
Mcu	7.05	7.51	5.7	6.21	0.000305435	yes
Plcd1	3.15	4.38	7.24	4.94	0.000305435	yes
Adgrg7	34.29	31.49	14.92	14.53	0.000311325	yes
Sfn;Zdhhc18	5.94	5.61	5.09	9.01	0.000311561	yes
Adgrf1	1.9	4.34	1.35	0.3	0.000311561	yes
Hist1h2ah	1.71	2.61	20.34	13.76	0.000318214	yes
Gsdma3	0	0.06	0	0	0.000318632	yes
Hook2	8.24	6.95	11.9	12.77	0.00032044	yes
Tmie	1.42	1.98	4.65	4.56	0.000322207	yes
Ctnnal1	4.84	1.75	2.45	2.05	0.000322809	yes
Filip1l	11.12	7.97	10.91	7.77	0.000325591	yes
Nkx2-6	0.3	0.11	0	0	0.000328068	yes
Ptgfrn	18.58	17.77	11.17	11.26	0.000329619	yes
Casp8	18.2	19.25	12.66	14.31	0.000330685	yes
Hmox1	8.46	8.18	13.34	3.97	0.000330759	yes
Fat2	5.48	11.02	7.75	13.24	0.000331662	yes
Rtn4	15.14	13	6.72	7.51	0.000333133	yes
Pdgfb	3.72	3.07	5.59	4.72	0.000334093	yes
Hist1h2ad;Hist1h2bg;Hist1h3d	17.66	16.64	24.68	15.9	0.000335013	yes
Hacd4	5.61	8.41	6.48	3.37	0.000335907	yes
Myrf	0.24	0.49	1.02	1.95	0.000340851	yes
Dgcr6	3.43	2.72	1.55	1.98	0.000342029	yes
Prom1	93.25	122.65	63.28	34.6	0.000356161	yes
Chmp2b	62.08	41.7	27.11	21.13	0.000356648	yes
Pilra	0.53	0.92	2.13	1.95	0.000356648	yes
Unc13d	0.8	0.98	1.66	2.15	0.000358378	yes
Mep1b	0.82	1.67	0.34	0	0.000360931	yes
Arfgef3	9.19	7	4.28	4.51	0.000361688	yes
Rab3il1	1.18	0.95	2.18	3.68	0.000362034	yes
Nol10	4.87	3.81	1.94	3.35	0.000373992	yes
Cass4	0.21	0.17	0.76	0.22	0.000374119	yes
Hacd3	43.46	51.35	44.35	44.36	0.000374341	yes
Fzd4	13.18	14.53	11.74	9.98	0.000380824	yes
Fam102a	17.18	21.55	27.67	21.56	0.000383001	yes
Ciita	0.98	1.08	0.86	2.9	0.000392261	yes
Efnb1	10.73	12.25	12.24	7.09	0.000395265	yes
Guca2a	0	0.43	3.11	2.13	0.000395694	yes
Arhgef10l	15.32	15.47	17.85	27.94	0.000396216	yes
Mknk2	48.16	51.39	84.44	97.35	0.000401972	yes
Mep1a	1.17	1.48	0.15	0	0.000403077	yes
Pag1	4.24	6.98	3.04	4.05	0.00040382	yes
Gipc2	6.61	5.29	5.99	9.33	0.000410754	yes
Hhip	0.32	0.27	0.25	0	0.000413586	yes
Slc24a5	0.06	0.06	1.93	0.22	0.000415448	yes
Cobl	9.57	3.72	5.53	5.51	0.000418398	yes
Cant1	9.09	6.36	6.63	9.56	0.000420652	yes
Galnt7	6.3	6.3	3.53	3.46	0.000427578	yes
Rims2	1.16	0.58	1.07	1.56	0.000432649	yes
Syvn1	15.39	13.29	10.28	15.57	0.000434826	yes
Mgst1	60.92	50.49	54.91	44.73	0.00043547	yes
Dok7	0.46	0.6	1.2	1.41	0.00043595	yes
Dnajb9	22.01	31.44	7.56	4.52	0.000436017	yes
Pkp3	13	11.22	22.54	19.6	0.000436807	yes
Btc	2.41	0.77	0.69	0.98	0.000441265	yes
Arc	2.55	1.15	0.73	4.23	0.000441343	yes
Eif4h	9.84	31.31	33.79	33.2	0.000441556	yes
Nlrc4	2.72	4.95	0.41	1.3	0.000442451	yes
Ier5l	2.17	3.15	3.09	3.43	0.000443064	yes
Slc41a3	1.34	1.33	2.54	3.48	0.00044476	yes
Lasp1	19.08	9.28	52.79	12.44	0.000444832	yes
Llgl1	12.75	11.98	12.83	15.31	0.000455421	yes
Ahnak	24.53	31.1	46.66	62.71	0.000456286	yes
Vsig2	0.19	0.49	1.76	2.74	0.000457893	yes
E2f8	0.45	0.51	0.55	0.68	0.000458269	yes
Phgdh	30.24	17.78	17.95	10.84	0.00046055	yes
Cdh8	0.09	0.05	0	0	0.000462634	yes
Acta1	9.39	24.37	5.91	11.34	0.000468266	yes
Gpr37l1	0.27	0.22	0	0.04	0.000468266	yes
Adhfe1	1.82	1.55	0.62	0.35	0.000468981	yes
Etfbkmt	4.79	6.7	5.36	5.54	0.000481476	yes
Sall3	3.66	4.41	5.09	6.15	0.000481476	yes
Pold3	4.68	4.41	4.59	3.53	0.000482745	yes
Ifi27	37.16	28.99	37.43	46.45	0.000482745	yes
Stat5a	6.37	7.86	7.83	9.07	0.000482745	yes
Spi1	1.52	1.75	3.37	1.91	0.000483294	yes
Tmprss2	115.34	119.85	110.08	91.33	0.000488311	yes
Nbea	9.38	8.3	4.85	6.72	0.000489216	yes
Epsti1	5.63	5.32	9.59	7.08	0.000492101	yes
Neto1	0.04	0.09	0.33	0.09	0.00049447	yes
Tkt	26.17	25.15	42.05	31.77	0.00049447	yes
Id4	1.19	2.09	1.35	0.75	0.000495635	yes
Vav1	2.4	2.08	2.87	4.3	0.000496047	yes
Nfe2l2	20.01	8.37	25.47	17.96	0.0005014	yes
Proc	0.65	0.42	0	0	0.000503959	yes
Scn4a	0	0.01	0	0	0.000504573	yes
Slc27a4	23.39	26.89	21.12	20.96	0.000506074	yes
Cxcl1	4.04	3.2	0.71	1.53	0.000509496	yes
Junb	37	35	61.07	64.17	0.000510488	yes
Lum	11.77	33.91	19.94	12.72	0.00051224	yes
Gm17689	1.79	7.06	0.09	0.2	0.000517566	yes
Shkbp1;Sptbn4	2.28	1.99	2.73	2.07	0.000520604	yes
Gpr55	0.5	0.88	0.88	0.27	0.00052195	yes
Tmc7	5.71	6	2.57	4.62	0.00052883	yes
Il17re	5.29	4.28	7.18	10.51	0.00053254	yes
Csf2rb	0.65	1.18	1.33	1.99	0.00053254	yes
Ccdc88b	0.84	0.81	1.27	3.4	0.0005362	yes
Zfp827	3.87	4.91	5.92	7.38	0.000541267	yes
Plxnd1	2.79	3.37	6.22	11.58	0.000542203	yes
Nr2f6	14.35	16.64	22.19	26.25	0.000542591	yes
Large1	5.14	4.54	3.79	5.97	0.000542591	yes
Sh3rf2	1.97	2.43	2.08	1.66	0.000548446	yes
Cenpb;Spef1	4.91	4.44	1.01	2.24	0.000554017	yes
Emilin2	0.79	1.6	2.15	0.91	0.000554017	yes
Pirb;Pira2;Gm14548	0.63	0.58	1.53	1.13	0.000561146	yes
Tapbp;Zbtb22	57.78	64.41	51.94	53.71	0.000561852	yes
Mtss1	1.59	3.38	2.96	4.48	0.000564015	yes
Iqsec1	4.52	4.85	7.42	10.79	0.00056474	yes
C1rb;C1ra	4.36	4.69	12.16	8.64	0.000567084	yes
H2afy	7.58	7.14	10.07	10.88	0.000573146	yes
Stk38l	14.99	9.63	3.93	1.23	0.000573709	yes
Bmpr1b	2.81	1.52	0.41	0.5	0.000583202	yes
Hist1h3g	10.15	9.59	11.67	10.92	0.000583884	yes
Il13ra1	37.61	45.38	30.29	16.76	0.000585155	yes
Prdx6	198.98	75.78	60.4	43.36	0.000586568	yes
Pvr	3.78	2.94	3.33	4.24	0.000593752	yes
Pik3c2a	23.62	25.01	13.96	12.85	0.000594098	yes
Cracr2b	10.16	9.37	25.95	19.76	0.0005946	yes
Ccn5	2.41	3.06	4.57	8.56	0.000597302	yes
Akr1cl	0.49	0.21	0	0	0.000600358	yes
Tenm4	0.84	1.19	0.9	1.23	0.000601554	yes
Grin1	2.28	2.01	0.56	0.7	0.00060846	yes
Hnf4g	1.66	2.14	0.74	1.84	0.00060863	yes
Slc28a3	16.02	15.93	8.41	10.25	0.00060912	yes
Oas1h	0.42	0.09	0.29	1.84	0.000610549	yes
Ms4a7	2.73	1.74	2.65	2.4	0.000612018	yes
Phyh	15.24	25.46	7.93	3.95	0.000612018	yes
Capza1	44.72	41.2	21.45	20.44	0.000612864	yes
Hdac7	3.61	3.88	4.27	9.84	0.000617375	yes
Cgnl1	18.13	22.93	21.47	23	0.000630968	yes
Col10a1	2.02	2.15	2.53	6.92	0.000636688	yes
Thsd4	1.01	1.29	0.97	2.9	0.000637851	yes
Psmb10	13.69	11.83	13.14	19.77	0.000639372	yes
Nefm	0.13	0.8	0	0	0.000642448	yes
Igdcc3	0.03	0.12	0.66	1.18	0.000643957	yes
Ly6e	348.63	337.93	339.62	137.1	0.000647877	yes
Ildr1	20.96	25.11	20.64	24.94	0.000658428	yes
Smad3	13.03	16.14	13.41	17.92	0.000659487	yes
Nsdhl	9.84	7.57	8.96	8.64	0.000660218	yes
Kif11	1.29	1.06	1.18	1.53	0.000667954	yes
Serpinf1	4.89	10.8	9.7	14.65	0.000668644	yes
Bicdl2	8.1	4.32	8.11	7.61	0.000681794	yes
Idi1	20.03	10.25	4.07	3.34	0.000683232	yes
Has3	1.2	1.86	2.44	0.99	0.000684564	yes
Acvr1b	13.62	15.83	10.79	11.4	0.000695018	yes
Pik3cg	3.7	3.52	2.06	2.04	0.000700216	yes
Cast	11.57	9.7	7.13	6.21	0.000701392	yes
Slc7a5	14.03	36.57	5.4	5.28	0.000709401	yes
Rnf223	0.57	0.34	0.69	1.23	0.000711141	yes
Tnfrsf9	0.37	0.52	0.39	0	0.000711636	yes
Nup210	3.46	2.91	3.5	5.48	0.000715733	yes
Abca2	10.66	11.05	13.45	12.84	0.000731373	yes
Rcn1	38.84	59.38	24.6	10.29	0.000735861	yes
Glb1l3	2.95	1.41	1.29	0.58	0.000742481	yes
Slc39a1	94.73	94.97	77.4	66.81	0.000749733	yes
Bmper	0.66	1.55	0.26	1.85	0.000757532	yes
Cnn1	16.58	53.1	5.08	12.73	0.000770089	yes
Cd53	9.9	9.93	14.6	8.86	0.000778024	yes
Eps8l2	10.42	9.62	16.05	18.1	0.000779851	yes
Selenos	28.04	35.36	10.7	11.84	0.000781996	yes
Rasgef1a	2.19	1.86	0.7	1.3	0.000787043	yes
Ssh3	12.02	11.48	12.68	20.18	0.000788505	yes
Epn3	18.24	19.62	27.92	24.36	0.000792973	yes
March3	2.29	2.05	2.09	3.77	0.000796828	yes
Trim56	11.21	13.22	11.55	12.8	0.000796828	yes
Luzp1	5.89	15.46	15.61	17.33	0.000802511	yes
Bspry	30.24	31.34	35.35	28.93	0.000804018	yes
Slc44a4	42.63	41.34	37.1	30.76	0.000804018	yes
A630095E13Rik	3.23	24.72	1.06	0.04	0.000804429	yes
Tmem98	45.52	49.42	36.98	24.33	0.000816959	yes
Chchd10	19.14	17.13	27.76	19.96	0.000819281	yes
Vmn1r65	0.01	0	0	0	0.000824271	yes
Zmynd15	1.31	0.97	1.1	2.26	0.00082518	yes
Wnk4	4.89	7.28	6.41	8.89	0.000827042	yes
Ptprs	4.65	5.44	7.42	9.13	0.000827684	yes
Gnmt	2.04	0.98	1.5	0.11	0.000834584	yes
Dzip1l	0.99	1.27	1.2	2.86	0.000834584	yes
Muc2	0.46	2.47	0.65	5.84	0.000838622	yes
Limk2	36.34	29.35	29.13	51.34	0.000843427	yes
Tcf3	9.78	8.79	10.76	16.3	0.000843427	yes
Fhl2	6.7	7.85	8.06	8.13	0.000845482	yes
Cdh11	2.32	4.2	1.83	3.51	0.000846345	yes
Sh2d6	0.26	0.44	3.78	0.75	0.000846345	yes
Ms4a4c	0.99	0.93	1.21	1.92	0.000848267	yes
Fam3c	10.54	7.55	3.49	3.2	0.000861976	yes
Rdh12	0.21	0.32	0	0	0.000867454	yes
Cd84	1.54	1.1	1.28	1.9	0.000868856	yes
Gabbr1	1.32	1.6	1.67	4.66	0.000875999	yes
Galnt4;Poc1b	20.84	22.2	12.81	12.13	0.000878212	yes
Tmem82	0.09	0.15	0.25	0.65	0.000883708	yes
Cldn7	85.32	83.79	56.38	54.64	0.000889657	yes
Hist1h2bm	5.98	5.93	15.19	9.36	0.000895031	yes
Grn	56.06	47.66	52.91	63.66	0.00090092	yes
A2m	0.4	3.47	0.22	0.27	0.000901914	yes
Hist1h2bc	44.98	36.78	43.3	30.72	0.000902693	yes
Tmem254a	11.03	8.04	1.3	2.92	0.000928923	yes
Parp10;Plec	23.15	14.58	27.4	40.61	0.00093811	yes
Gtf2ird1	4.14	3.6	3.62	5.36	0.000941833	yes
Mrap2	0.06	0.11	0	0.38	0.000941833	yes
Syt12	1.32	1.06	1.28	1.19	0.000943774	yes
Fxyd4	26.53	16.31	7.52	2.52	0.000949423	yes
Ccl8	14.01	14.92	28.53	26.13	0.000955375	yes
Tnfrsf11b	3.07	2.58	0.58	2.15	0.000973014	yes
Pdgfrb	2.89	4.57	3.63	6.56	0.000986127	yes
Map3k14	1.87	2.14	3.07	4.4	0.000988991	yes
Capg	17.3	16.46	23.53	24.51	0.000992901	yes
Krt13	0.94	2.2	0.57	2.71	0.000993207	yes
Hcn4	0.1	0.31	0.57	1.43	0.0010071	yes
Irak4	6.38	5.9	4.85	5.46	0.00100721	yes
Macc1	4.83	5.71	1.1	2.2	0.00101894	yes
Gpr165	0.03	0.03	0	0	0.00102276	yes
Pkm	143.76	99.82	122.52	79.95	0.00102655	yes
9130230L23Rik	0.73	0.48	0.25	0.24	0.00103443	yes
Ccna2	3.35	2.82	2.86	2.21	0.00103552	yes
Lysmd1	3.13	2.79	1.16	1.72	0.0010449	yes
Prex1	1.72	1.28	2	3.83	0.00105626	yes
Nol4l	1.81	2.39	1.14	2.92	0.00106761	yes
Tlr13	1.57	1.82	3.97	1.5	0.00106889	yes
Cdc42ep1	19.99	17.37	13.64	13.24	0.00106964	yes
Dnmt1	6.81	6.75	8.68	9.54	0.00107501	yes
C3ar1	3.35	3.31	4.71	5.04	0.00107839	yes
Slc6a6	7.44	11.97	7.86	11.97	0.00109164	yes
Kndc1	0.21	0.16	0.03	0.69	0.00110563	yes
Tcaf2	9.77	5.54	16.67	3.12	0.00110868	yes
Myl9	29.75	62.29	21.32	14.59	0.00111681	yes
Nfkbia	29.95	30.33	20.74	34.74	0.00111907	yes
Tspan14	27.02	22.6	25.33	18.46	0.00111987	yes
Rgl3	4	3.5	6.18	9.96	0.00112676	yes
Ifne	0.9	1.08	3.21	1.22	0.00112906	yes
Pgpep1	13.58	10.25	13.16	9.36	0.00113403	yes
Rbfox3	0.55	1.99	0.25	0.02	0.00113957	yes
Vsir	3.28	5.42	5.98	6.26	0.00114632	yes
Ube2v2	2.87	2.54	0.39	0.75	0.00115326	yes
Zfp36l1	60.2	51.09	68.1	68.77	0.00116365	yes
Gm16867	1.41	1.23	0.15	0.09	0.00117254	yes
Fmnl3	3.43	3.22	3.13	5.73	0.00117295	yes
Gad2	0.14	0.42	0	0.11	0.00117449	yes
Dusp6	7.84	8.12	12.8	10.72	0.00117985	yes
Rnf31;Irf9	9.55	8.12	6.95	9.83	0.00119423	yes
Kcnk3	12.78	1.92	1.22	1.35	0.00119423	yes
Ralgds	5.31	6.3	8.8	12.8	0.00120065	yes
Lrrc52	7	0.16	0	0	0.00120558	yes
Ifi209	0.97	1.34	0.29	2.45	0.00121593	yes
H2-Aa	27.29	31.6	6.96	45.42	0.00122026	yes
Nectin2	26.34	24.72	30.24	19.66	0.00123072	yes
Slk	12.59	11.01	8.35	14.97	0.00123751	yes
Colec12	2.09	3.54	2.63	3.35	0.00126154	yes
Slc9a3r2	9.02	12.4	27.41	27.64	0.0012639	yes
Hcn1	0.02	0.04	0.07	0.11	0.00127503	yes
Usp35	1.71	1.65	3.15	2.59	0.00127503	yes
Fgf14	0.01	0.5	0.35	0.98	0.0012837	yes
Atp2a1	0.53	0.05	0.22	1.59	0.00128698	yes
Ppp1r14c	0.08	0.28	0.7	0.3	0.00129146	yes
Iqgap1	26.23	27.4	26.46	22.04	0.00131239	yes
St8sia5	0.01	0.2	0.18	0.64	0.00131239	yes
Mt3	0.11	0.08	1.04	0	0.00132518	yes
Fgd2	1.08	0.85	1.86	4.03	0.00132777	yes
Hmgcs1	20.12	19.91	7.03	8.11	0.0013292	yes
Nlrp6	0.13	0.22	0.11	0.22	0.00133439	yes
Hk3	0.47	0.43	2.6	1.72	0.00134101	yes
Edem2	20.2	17.79	16.36	17.76	0.00134258	yes
Ube2l6	9.42	3.96	13.48	9.39	0.00134258	yes
Fam53b;Eef1akmt2	4.58	5.11	3.14	7.46	0.00134656	yes
Neb	0.35	0.45	0.17	0.36	0.00134885	yes
Fcho1	1.12	0.79	1.96	2.78	0.00135786	yes
Tmod3	14.2	15.39	8.68	7.96	0.00138568	yes
Rnf186;Tmco4	8.64	7.97	10.88	10.04	0.00139024	yes
Clec2e	23.67	19.96	6.58	0	0.00140282	yes
Flt4	1.41	1.17	2.92	2.27	0.00141129	yes
Ctnnb1	240.36	236.52	228.09	165.32	0.0014312	yes
Mroh4	1.78	1.47	1.04	1.63	0.00143672	yes
Nupr1	88.43	64.83	73.43	78.66	0.00143672	yes
Nectin4	16.17	15.81	11.05	16.57	0.00143672	yes
Psg25	0.52	0.63	1.34	1	0.00144442	yes
Cpe	8.25	19.52	4.57	4.55	0.00144442	yes
Ski	7.6	9.76	19.2	28.57	0.00144453	yes
Rasal1	2.78	3.17	1.88	5.36	0.00144692	yes
Cyb5r3	31.03	32.58	46.39	40.62	0.00145451	yes
Sri	12.57	13.41	15.5	10.12	0.00145499	yes
Sphk1	1.35	1.37	7.8	2.09	0.00146761	yes
Plekhg2	2.27	2.04	3.41	3.96	0.00147623	yes
Loxl1	3.12	6.12	4.58	10.96	0.00147948	yes
Egf	62.06	7.55	6.54	4.27	0.0014822	yes
Hpn	2.02	4.95	6.95	5.68	0.00148558	yes
Pla2g4a	8.43	11.37	3.35	4.46	0.00148624	yes
Lrfn4	2.14	3.1	5.75	6.58	0.00148918	yes
Bhlhe22	0.71	1.06	1.12	1.42	0.00149359	yes
Cgref1	0.51	0.36	0.15	0.08	0.00149359	yes
Lrrc19	1.17	1.3	0	0	0.00149623	yes
Tmem184b	7.54	5.19	11.88	16.5	0.00149628	yes
Ccnf	0.73	0.64	1.37	1.17	0.00149945	yes
Xpnpep2	0.1	0.2	0.67	0.5	0.00150194	yes
Lig1	4.19	4.18	6.05	5.05	0.00151251	yes
Tnnt3	0.03	0.04	1.26	0.5	0.00151387	yes
Tll1	0.09	0.16	0	0	0.0015191	yes
Phactr2	2.74	3.67	1.66	5.98	0.00152131	yes
Mrgpra9	0	0	0	0	0.0015216	yes
Fbp2	7.41	8.16	7.74	6.84	0.00152225	yes
Zfp354b	0.55	0.35	0	0	0.00154292	yes
Sorbs3	2.77	3.18	8.32	7.07	0.00155641	yes
Nlrp1b	0.43	0.58	0.39	1.75	0.00155641	yes
Hhipl1	0.2	0.61	0.62	1.13	0.00157633	yes
Fam129b	46.63	51.06	49.56	45.58	0.00158236	yes
Pafah1b3	7.52	5.63	16.07	7.04	0.00158653	yes
Cfp	4.1	3.82	6.52	13.3	0.00159765	yes
Adamts4	0.97	1.1	0.33	0.78	0.00160285	yes
Mob3b	8.23	9.43	5.09	4.17	0.00160662	yes
Gm436	0.29	0.1	0	0	0.00161457	yes
Mafa	0.2	0.25	0.02	0.03	0.00163014	yes
Cept1	16.89	10.48	13.55	12.13	0.00163982	yes
Gcat;Galr3	1.93	1.6	0.95	1.03	0.00163982	yes
Magix	0.63	0.68	0.11	0.08	0.00163982	yes
Adam19	0.87	1.33	1.82	2.5	0.00163982	yes
Pcdhb9	1.29	1.69	0.97	0.62	0.00164946	yes
Npy6r	0.11	0.07	0	0	0.00165252	yes
Tmem119	4.01	5.14	6.63	6.91	0.00167471	yes
Tnip1	7.26	6.85	10.72	7.03	0.00167539	yes
Myl12b;Myl12a	37.6	30.37	43.78	30.47	0.00167712	yes
Afdn	16.91	15.02	14.91	19.31	0.0016977	yes
Parp8	6.83	4.29	5.54	7.79	0.0016977	yes
5730507C01Rik	1.15	1.08	0	0	0.00169918	yes
Pdk4	0.35	0.61	0.17	0.23	0.00172276	yes
Ctr9	9.41	8.17	5.91	5.38	0.00172605	yes
B430306N03Rik	0.23	0.27	1.05	0.62	0.0017346	yes
Zbtb10	7.98	7.21	2.9	3.83	0.00174091	yes
Sord	18.5	38.08	19.99	27.09	0.00174789	yes
Tyrobp	17.57	16.23	29.41	21.73	0.00175122	yes
Pgm5	9.74	21.36	4.66	6.67	0.00176222	yes
Sh2d4a	14.94	17.72	17.08	14.63	0.00176558	yes
Mapk13	27	15.29	26.86	24.99	0.00176862	yes
Igdcc4	0.35	0.88	0.91	1.49	0.00177171	yes
Nras	22.91	5.96	12.59	5.62	0.00179004	yes
P2ry13	0.55	1.02	2.59	3.13	0.00179447	yes
Elk3	6.21	9.6	4.86	3.96	0.00180121	yes
Hes6	12.37	9.85	17.96	18.57	0.00180769	yes
Ints7	5.12	4.87	2.8	4.32	0.00182086	yes
Jchain	7.36	3.02	6.76	2.21	0.00183586	yes
Ahr	12.17	16.44	14.17	14.41	0.00184145	yes
Tbl1xr1	11.17	11.74	6.34	6.59	0.00184345	yes
Nrap	0.25	0.17	0.5	0.56	0.0018494	yes
Rin1	2.52	2.65	1.94	4.16	0.00186711	yes
Hebp2	6.1	5.44	7.24	4.13	0.00187235	yes
Gm26602	0.31	0.97	7.77	4.53	0.00188351	yes
Mpzl3	8.39	5.23	2.61	4.45	0.00188649	yes
Bicc1	1.9	3.93	2.12	5.92	0.0018886	yes
Chrd	0.8	1.02	0.8	2.62	0.00188869	yes
Gars	26.14	25.42	16.65	15.75	0.0018933	yes
Adap1	2.02	2.4	3.07	2.13	0.0018933	yes
Txnrd1	17.74	17.63	15.19	12.58	0.00189807	yes
Amdhd2	10.65	6.58	8.39	8.42	0.00190263	yes
Cd55	6.67	6.1	5.16	5.53	0.00191489	yes
Ctns	20.89	12.39	6.62	10.63	0.00192773	yes
Arid5b	7.35	10.52	10.65	11.02	0.00193879	yes
Ildr2	0.98	1.56	1.62	1.27	0.00194797	yes
Gstm1;Gstm2	30.44	30.56	15.06	11.85	0.00195952	yes
1700066B19Rik	1.01	1.18	0.16	1.48	0.00197406	yes
Spcs3	18.47	7.14	3.28	4.97	0.00198586	yes
Iqgap3	0.66	0.55	0.61	0.72	0.00199443	yes
Slc7a1	6.88	6.75	2.25	3.45	0.00199988	yes
Dlst	3.54	3.9	6.1	8.37	0.00200109	yes
Otud7a	0.07	0.1	0.22	0.19	0.00201586	yes
Lsr	77.5	64.5	76.57	43.67	0.00203498	yes
Dnaaf1	0.57	0.95	1.69	0.66	0.00203722	yes
Tead2	1.48	2.19	1.71	0.97	0.00204541	yes
Grap2	0.52	0.25	0.39	1.1	0.00204902	yes
Lrrc8e	2.77	3.81	1.22	1.61	0.00204902	yes
Trim29	2.56	5.49	3.57	2.48	0.00207532	yes
Arhgef10	3.16	4.63	4.5	5.03	0.00209619	yes
Cd22	0.15	0.15	0.54	0.36	0.00209645	yes
Zfp811	0.25	0.22	0	0	0.00211359	yes
Clec2h	0.2	0.51	0.29	1.21	0.00211359	yes
Top2a	3.57	3.39	2.45	2.85	0.00211359	yes
Enpp1	4.51	6.59	5.09	4.87	0.00211954	yes
Traf3	9.06	9.65	4.51	2.64	0.00211954	yes
Epha1	8.48	8.35	10.14	10.59	0.00212041	yes
Dcst2	0.45	0.42	0	0	0.00214022	yes
Olr1	0.11	0.2	0.4	0.25	0.00214792	yes
Vav3	3.78	4.53	5.6	1.98	0.00215486	yes
Cers3	9.52	12.71	5.42	5.94	0.00215729	yes
Hif1a;Snapc1;Gm49321	13.61	14.64	13.83	9.01	0.00215729	yes
Trim25	24.88	25.93	17.06	22.58	0.00217542	yes
Slit3	6.39	15.2	10.8	24.15	0.00218023	yes
Cacnb2	0.24	0.17	0.09	0.11	0.00218196	yes
Amotl1	7.54	5.88	3.05	6.16	0.00218925	yes
Vasp	19.37	16.72	27.3	19.16	0.00220075	yes
Arhgef16	12.03	10.56	11.81	16.07	0.00221847	yes
Mink1	11.39	11.31	15.74	22.33	0.00222826	yes
Capns1	63.52	64.29	42.09	36.36	0.00223178	yes
Glis2	0.94	1.25	2.29	6.71	0.00223286	yes
Adgrg1	34.87	32.23	13.73	22.43	0.00223287	yes
Pirt	1.3	0.19	0.44	0.51	0.00224813	yes
Lamb3	7.31	8.6	10.21	8.59	0.00225082	yes
Nipal4	0.14	0.22	0	0	0.00226512	yes
Sis	0.08	0.21	0.41	0.12	0.00226547	yes
Chad	4.44	4.57	7.81	16.2	0.00227885	yes
Pamr1	2.68	1.82	2.7	2.23	0.0022825	yes
Nup62cl	0.26	0.43	0	0	0.00230745	yes
Axin2	1.16	2.73	1.19	2.78	0.0023107	yes
Vmp1	33.47	25.27	20.19	27.33	0.00231711	yes
Olfr750	0.02	0.01	0	0	0.00232816	yes
Asxl3	0.43	0.1	0.51	0.13	0.00232816	yes
Dtnbp1	5.05	4.41	7.98	10.23	0.0023486	yes
Prox1	0.38	0.64	0.9	0.76	0.00235372	yes
Zmiz1	4.88	5.81	9.15	13.11	0.00235372	yes
Slc22a15	0.54	0.89	0.6	1.12	0.00235934	yes
Armcx3	9.05	7.91	3.64	3.04	0.00236049	yes
Gsdma;Gsdma2	1.18	0.43	2.93	0.65	0.00236425	yes
Cilp2	0.03	0.03	0	0	0.00236425	yes
Kif3b	14.43	14.28	7.19	12.85	0.00236715	yes
Cerk	6.43	6.33	3.4	3.32	0.00237636	yes
Pkp1	8.18	13.11	6.41	10.39	0.0023771	yes
Kcnh3	0.09	0.12	0.37	0.68	0.00238647	yes
Hist1h2ab	17.12	17.86	23.8	30.46	0.00240211	yes
Dmkn	0.56	1.16	0.39	0.4	0.00241878	yes
Pbsn	37.11	6.96	76.33	6.79	0.00241982	yes
H2-Q7;H2-Q6;H2-D1;H2-Q4;H2-Q10;H2-Q1	31.09	28.83	28.33	38.47	0.00243102	yes
Hexa	94.37	78.38	50.68	31.24	0.00244079	yes
Tsc22d1	10.97	18.92	13.22	11	0.0024575	yes
Accs	0.91	0.67	0.76	2.75	0.00247399	yes
9530053A07Rik;Fcgbp	74.19	38.96	110.66	71.96	0.00248877	yes
Vwa5a	28.27	30.6	23.64	21.88	0.00254722	yes
Nckipsd	4.23	3.48	4.32	7.71	0.00256966	yes
Dapp1	4.74	6.04	3.87	2.03	0.00257112	yes
Mllt3	6.74	4.85	4.94	4.71	0.00257112	yes
Dot1l	2.88	3.22	3.95	8.35	0.00257377	yes
Cfap53	0.19	0.32	0	0	0.0025784	yes
Lgals2	2.44	6.22	8.42	3.13	0.00258141	yes
Epcam	178.21	153	199.94	185.35	0.00258276	yes
Lyn	9.27	10.27	10.31	12.36	0.00258276	yes
Dram2	42.65	33.63	20.02	6.46	0.00258416	yes
Hdgfl3	1.54	2.5	1.45	1.03	0.00261514	yes
Nin	5.13	3.41	2.85	3.85	0.00264983	yes
Rel	3.47	3.95	2.71	3.33	0.00265926	yes
Gpr176;Fsip1	0.22	0.22	0.37	1.08	0.00265948	yes
Aldoc	5.43	3.83	7.32	4.11	0.00268189	yes
Cipc	7.02	6.35	4.38	4.5	0.0026824	yes
Hoxa13	10.18	14.24	11.22	9.9	0.00268382	yes
Nkain4	0.05	0.36	0	0	0.00268505	yes
Alox5	0.44	0.61	2.07	2.26	0.00268505	yes
Dbt	9.19	6.7	5.5	3.98	0.00270349	yes
Nipsnap1	4.18	4.28	7.13	5.49	0.00270358	yes
Mpeg1	22.13	20.13	14.41	5.13	0.00272346	yes
Nav1	1.67	2.96	1.84	4.58	0.00273109	yes
Trio	4.74	4.37	5.98	7.96	0.00273335	yes
Samd11	0.12	0.15	0	0	0.00274778	yes
Dcp2	12.77	12.25	7.24	6.33	0.00275796	yes
Tubb2b	9.36	9.64	8.06	6.45	0.00278022	yes
Tmem71	3.17	3.3	3.09	2.08	0.0028014	yes
Leng1;Tmc4;Mboat7	17.77	17.53	14.57	17.32	0.00280713	yes
Ednra	2.3	6.23	2.56	6.39	0.00282156	yes
Knstrn	0.48	0.42	0.78	1.18	0.00283978	yes
Bcat2	4.89	4.96	5.28	6.03	0.00285707	yes
Tmem106a	2.48	2.37	3.44	2.49	0.00286112	yes
Cenpe	0.59	0.59	0.83	1.37	0.00288619	yes
Hist1h1d	5.99	6.74	6.44	11.98	0.00288619	yes
Limd2	7.2	6.2	12.82	7.06	0.00288785	yes
Frrs1	3.07	5.47	2.97	2.73	0.0028995	yes
Col16a1	4.72	5.81	8.85	20.95	0.00289952	yes
H2-DMb2;H2-DMb1	4.09	4.17	5.16	3.63	0.00290003	yes
Smc4	4.6	5.33	4.88	4.87	0.00293181	yes
Plekhg3	9.35	8.17	9.15	12.65	0.00293236	yes
Spsb1	3.25	2.73	2.48	3.46	0.00293667	yes
Zfp36	7.9	8.14	10.33	22.67	0.00294448	yes
Gm5615	1.75	0.61	8.15	1.27	0.00294448	yes
Tlr3	10.26	9.15	5.17	3.27	0.00294448	yes
Cmbl	9.34	10.18	8.32	3.31	0.00294448	yes
Gpr39	5.92	6.37	6.12	6.8	0.00297313	yes
Polk	4.03	3.64	4.06	5.4	0.00298617	yes
Tmod4	0.31	0.15	0.18	0	0.00299189	yes
Ifi27l2a	16.73	18.69	58.77	42.21	0.00302021	yes
Dcaf12l1	9.75	1.49	0.24	0.61	0.00303368	yes
Grb14	0.29	0.34	0.25	0.63	0.00303521	yes
Sh3bp1;Gm49510;Pdxp	1.15	1.86	1.8	4.23	0.00303521	yes
Habp2	0.48	1.64	1.97	5.78	0.00303879	yes
Kcnh8	0.03	0.04	0.33	0.25	0.00305189	yes
Hoxd13	14.43	20.69	5.03	5.59	0.00306937	yes
Nek7	8.22	6.52	12.49	9.43	0.00306937	yes
Bmyc	29.66	27.13	26.46	28.17	0.00308676	yes
Dab2	2.68	4.44	3.21	7.54	0.00310297	yes
Rgl2	7.76	6.8	10.74	17.8	0.00311052	yes
Arntl2	0.96	1.16	0.21	0.17	0.0031405	yes
Plekhh3	6	4.4	5.59	8.64	0.00316626	yes
Tcaf3	3.33	0.87	22.76	0.88	0.00318844	yes
Lrrc45;Rac3	7.93	6.49	6.86	14.2	0.00319112	yes
Gcsh	14.38	13.11	11.57	9.85	0.00319988	yes
Peg10	0.3	1.53	3.71	1.24	0.00324253	yes
Dscam	0.03	0.04	0	0	0.00324757	yes
Pitpna	63.6	30.22	41.16	35.48	0.0032896	yes
Tinag	2.31	2.73	0.87	2.33	0.0032896	yes
Apln	0.77	1.05	0.97	1.03	0.00330817	yes
Mroh2a	0.69	0.67	1.29	0.37	0.00332515	yes
Gfra1	1.62	3.85	1.71	1.51	0.00332822	yes
Fam135a	8.59	9.11	4.22	5.65	0.00332822	yes
Casr	0.06	0.06	0.29	0	0.00333392	yes
Nedd4l	4.79	5.25	5.81	5.23	0.00335476	yes
Apobec3	5.23	4.91	5	7.21	0.00335881	yes
Cntnap5a	0.02	0.02	0.13	0.4	0.00336148	yes
Mtap	11.49	12.22	8.05	6.84	0.00336705	yes
Tmem45a	3.64	4.35	4.05	1.12	0.0033755	yes
Hsph1	4.43	3.9	2.23	3.17	0.00338339	yes
Pld1	1.14	1.48	0.82	1.77	0.00339927	yes
Slc47a2	0	0	0	0	0.00340124	yes
Sdhc	20.7	18.83	19.51	12.78	0.00340124	yes
Kif23	0.43	0.53	0.94	1.15	0.00340179	yes
Ccdc122	3.57	3.49	2.68	1.98	0.00340363	yes
Casp3	14.6	13.39	3.73	4	0.00345168	yes
Siae	2.81	3.4	1.55	1.37	0.00345243	yes
Ankrd44	2.5	2.51	1.92	2.88	0.00346471	yes
Ncmap	3.2	3.52	3.42	3.34	0.00347104	yes
Homer3	3.74	3.4	3.35	7.03	0.00347298	yes
Vsig10	15.31	15.05	6.7	7.72	0.00347298	yes
Hist1h2ak	29.96	26.05	57.51	28.01	0.0034884	yes
Ncf1	1.97	2.09	4.51	2.85	0.00349471	yes
Slc5a8	83.06	12.12	6.2	3.55	0.00349599	yes
Unc5c	0.3	0.11	0.06	0.07	0.00350483	yes
Sult2b1	0.59	0.43	1.34	0.4	0.00351318	yes
Ncf4	1.18	1.08	3.04	4.42	0.00352845	yes
Cyp3a13	0.93	1.74	0.71	0.44	0.00352998	yes
Serpina9;Serpina11	0.09	0.2	0.66	0.22	0.00353416	yes
Abhd17c	20.41	15.81	13.02	14.41	0.00353827	yes
Cckar	0	0	0	0	0.00354344	yes
Slc22a18	13.9	13.63	13.01	15.88	0.00355804	yes
Ppp1cc	22.29	22.54	25.45	28.35	0.00357116	yes
Scamp2	30.6	28.83	34.31	37.35	0.00360285	yes
Mmp11	1.2	1.81	1.83	2.33	0.00361335	yes
Tm4sf20	1.47	2.35	0.17	1.76	0.00363294	yes
2810459M11Rik	0.64	1.05	0.67	1.46	0.00364017	yes
Stk10	1.19	1.32	1.98	3.17	0.00364405	yes
Gna14	6.73	4.26	3.43	2.94	0.00366235	yes
C1s2	2.59	0.78	2.8	1.71	0.00368197	yes
Mfsd4a	23.56	27.08	14.93	29.48	0.0036832	yes
Shc2	0.7	1.06	1.3	2.11	0.00368356	yes
Galnt14	0.43	0.56	0.35	0.85	0.00368441	yes
Magt1	22.87	27.66	7.5	8.89	0.00368562	yes
Grid2	0.05	0.06	0.38	0.1	0.00369836	yes
Efna5	5.35	6.91	3.97	3.05	0.00370657	yes
Rab3b	0.07	0.22	1.65	0.58	0.00370733	yes
Gan	4.67	4.19	4.1	6.91	0.00371775	yes
Rimklb	0.92	0.14	0.12	0.48	0.00372153	yes
Nckap5	0.46	0.32	0.27	0.45	0.00373885	yes
Sftpd	0.22	0.56	5.8	2.52	0.00373927	yes
Foxc1	2.82	4.06	3.44	3.8	0.00376427	yes
Prmt2	4.68	4.15	3.88	2.93	0.00376466	yes
Etl4	5.95	5.87	5.27	7.59	0.00377573	yes
Traf2	6.04	5.38	4.22	8.9	0.0038017	yes
A230050P20Rik	2.13	1.08	3.58	8.36	0.0038073	yes
Tgm4;Tmem42	22.28	3.54	29.56	4.28	0.0038117	yes
Zc3h12a	6.08	6.45	6.73	8.55	0.00382758	yes
9530002B09Rik	1527.73	44.76	253.8	31.61	0.00382758	yes
Txndc16	2.9	2.85	2.36	1.36	0.00383654	yes
Slc33a1	20.54	21.88	4.57	3.7	0.00384954	yes
Eps8	5.92	6.95	5.68	5.63	0.00386347	yes
Pla2g2f	1.28	1.08	0.9	0.4	0.00387623	yes
Dgkq	2.14	1.65	2.59	4.29	0.00389661	yes
Aqp5	1.75	3.02	5.49	3.39	0.0038992	yes
Rreb1	5.27	5.21	7.82	8.46	0.00390663	yes
Rasl10a	1.79	1.84	3.61	2.15	0.00394479	yes
Ubtd1	10.46	8.83	15.03	15.23	0.00396575	yes
Fxyd5	0.7	1.49	5.02	2.73	0.00396575	yes
Bckdhb	4.22	3.58	2.13	3.76	0.00398013	yes
Rhbdf1	7.13	5.92	6.25	14.31	0.00400003	yes
Fam210a	6.86	6.25	3.73	3.73	0.00400281	yes
Ankrd35	0.11	0.17	0.16	0.03	0.00402346	yes
Fam107b	13.37	17.4	14.5	11.42	0.00402346	yes
Sdc4	140.67	131.75	109.3	74.82	0.00405445	yes
Cnksr2	0.19	0.35	0.87	0.51	0.00408571	yes
Klk1b11	0.52	0.68	1.29	0	0.00408571	yes
Morc3	8.35	8.72	7.36	11.3	0.00408869	yes
Ptpn1	17.99	11.99	6.89	16.97	0.00409391	yes
Slc7a7	3.39	5.96	1.19	3.17	0.00411388	yes
Slc14a1	0.25	0.65	0.65	0.72	0.00412279	yes
Itga4	0.68	0.93	0.6	1.17	0.00413024	yes
Rflnb	14.69	16.12	10.1	8.7	0.00415893	yes
Cyp4f39	0.87	1.24	1.64	2.15	0.00416048	yes
Adgrg5	0.31	0.28	1.75	1.81	0.00418175	yes
Rgs10	2.09	2.21	3.22	4.56	0.00418175	yes
Cyp2d9	0.05	0.08	0.38	0.01	0.00421602	yes
S100b	2.31	2.47	5.46	1.2	0.00421927	yes
H2-DMa	3.39	2.82	4.19	5.79	0.00422369	yes
Gatm	3.14	2.2	8.45	4.27	0.00423495	yes
Fam83f	7.55	7.4	10.49	7.79	0.00425343	yes
Gm7173	0.68	0.75	0.32	1.8	0.00427067	yes
Mafb	5.68	7.08	5.19	8.6	0.00428049	yes
Slc23a4	0.21	0.25	0.66	0.46	0.00430787	yes
Man2a2	4.81	6.36	6.39	13.86	0.00434899	yes
Uhrf1	2.61	3.1	2.03	2.64	0.00434899	yes
Lhfp	2.98	2.88	2.35	2.95	0.00436394	yes
Hist1h3c	21.79	22.15	12.09	10.87	0.00440641	yes
Fam49b	5.47	4.17	4.46	4.02	0.00440916	yes
Rcor1	8.9	8.48	8.64	6.73	0.00441205	yes
Ikbkb	2.53	2.48	3.48	4.57	0.00441205	yes
Zfp219	6.25	7.35	8.67	14.12	0.00445471	yes
Aldh6a1	39.59	18.21	8.84	4.97	0.00445581	yes
Panx1	3.75	3.13	2.69	3.72	0.00448588	yes
2900026A02Rik	12.87	13.81	9.34	22.04	0.00449516	yes
Plk3	0.96	1	2.72	2.51	0.00452752	yes
Taok3	4.32	3.46	6.44	8.61	0.00453146	yes
Slc11a1	1.73	1.5	2	2.89	0.00453161	yes
Myo19	1.31	1.47	2	3.3	0.00454108	yes
Plcb4	4.29	5.85	4.19	3.23	0.00455574	yes
Mlkl	3.73	3.67	2.71	6.67	0.0045562	yes
Exoc4	20.11	13.43	13.91	13.96	0.00455677	yes
Tnn	0.25	0.28	0.33	0.18	0.00455769	yes
Plekha1	4.83	3.94	2.12	4.63	0.00456427	yes
Cyfip1	15.36	12.86	9.8	9.47	0.00459664	yes
Rgs19	3.74	2.85	6.27	5.88	0.00459664	yes
Mgat4c	0.01	0.07	0.14	0.27	0.00460593	yes
Rbms3	2.65	3.92	2.89	7.3	0.00461693	yes
Shf	1.53	1.37	2.33	4.05	0.00461693	yes
Zfp809	2.53	2.64	2.89	8.7	0.00462663	yes
Kif1a	0.48	1	1.33	2.71	0.00462821	yes
Rasal3	0.45	0.48	1.02	2.27	0.00463768	yes
Map3k9	6.2	5.12	3.74	5.88	0.00464327	yes
Coro1a	4.45	3.56	6.61	6.92	0.00471717	yes
Naa40	4.84	3.92	3.89	5.21	0.00471717	yes
Hvcn1	3.91	5.18	3.8	3.38	0.00473446	yes
Prlr;Agxt2	3.63	5.94	5.43	2.28	0.00474901	yes
Meis1	3.75	4.28	4.68	6.69	0.00475986	yes
Cd33	1.03	1.45	1.56	0.93	0.00477064	yes
Mbd2	14.3	14.15	14.26	23.14	0.00479274	yes
Dscc1	0.16	0.09	0.39	0.66	0.00479594	yes
Galc	1.96	2.2	1.3	1.04	0.00483305	yes
Eml3	6.52	7.82	6.64	11.73	0.00483305	yes
Setbp1	5.72	6.26	5.1	12.54	0.00483327	yes
Rgs3	2.25	2.61	3.47	2.38	0.00486526	yes
Ifi35	14.58	11.61	19.19	14.93	0.00487778	yes
Gnat3	0.68	0.81	0.46	0.95	0.00488355	yes
Ubxn10	0.08	0.1	0.19	0	0.00490494	yes
Ets2	8.05	7.3	8.17	13.83	0.00491629	yes
Vps13d	12.47	12.94	11.94	18.88	0.00491777	yes
Gm1110	0.02	0	0.02	0.01	0.00491777	yes
Spats2	5.69	5.11	6.19	6.01	0.00492488	yes
Gadd45b	5.27	3.81	8.06	5.74	0.00499306	yes
Plcd3	8.71	8.49	5.42	15.7	0.00499468	yes
Ficd	5.08	5.61	3.48	2.67	0.00506253	yes
Celsr3	0.04	0.04	0.09	0.51	0.00507594	yes
Esm1	0.29	0.79	0.01	0.88	0.00511592	yes
Krt6a;Krt5	27.08	44.63	10.98	20.19	0.00512242	yes
Kpna2	25.6	19.57	16.33	12.26	0.00515546	yes
Col11a1	0.25	0.35	0.43	0.6	0.00517645	yes
Zfp276	1.98	1.87	3.04	6.79	0.00519146	yes
Unc80	0.09	0.05	0.14	0.4	0.00519146	yes
Fdft1	22.39	11.24	9.24	9.51	0.00519939	yes
Zbtb39	7.89	6.75	7.57	6.15	0.00522924	yes
Dock6	1.9	1.91	1.99	6.17	0.00523609	yes
Pam	23.8	23.04	17.05	16.93	0.00528065	yes
Zswim4	4.07	3.15	8.42	6.43	0.00529634	yes
Nyap1	1.3	1.36	1.31	1.04	0.00530415	yes
Gbp7	2.91	2.92	1.86	4.06	0.00530592	yes
Ifngr2	36.71	32.94	28.48	14.81	0.00530592	yes
Plin5	0.79	0.8	1.49	3.64	0.00530808	yes
Rspo3	1.03	2.36	0.98	0.47	0.00532222	yes
Card11	0.36	0.31	1.02	1.96	0.00532558	yes
Zfp9	1.15	1.45	1.29	1.02	0.00535306	yes
Mtmr11	3.28	3.23	2.89	7.93	0.00537211	yes
Nr1i2	0.76	0.94	1.06	0	0.00542075	yes
Csf2rb2	1.2	1.44	3.07	3.43	0.00549791	yes
Dnd1	0.37	0.32	0	0	0.00553115	yes
Lrrc32	1.75	5.01	0.98	2.27	0.00553115	yes
Spon1	1.63	4.14	2.22	5.61	0.00556431	yes
Rps6ka2	0.54	0.45	0.73	1.11	0.00557011	yes
Proser2	4.85	2.5	3.04	2.1	0.00560375	yes
Tmem176b	49.96	47.56	95.27	94.63	0.0056157	yes
Mapk11	5.61	2.9	2.1	4.19	0.00561575	yes
Sycp1	0	0	0	1.35	0.00562617	yes
Mta3	7.93	6.77	8.5	11.18	0.00566303	yes
Slc22a23	14.51	13.53	12.33	16.16	0.00567142	yes
Smim15	14.48	16.41	7.34	5.18	0.00567915	yes
Oas1f	0.34	0.41	1.56	0.31	0.00567915	yes
Abhd6	4.97	6.79	6.81	8.96	0.00570306	yes
Sned1	0.97	1.84	2.71	5.39	0.00570906	yes
Epb41l4a	3.31	3.9	2.37	5.03	0.00580189	yes
Fryl	11.41	9.98	10.95	17.29	0.00581247	yes
Itgbl1	2.89	5.5	4.3	4.33	0.00585178	yes
Tax1bp3	37.86	29.98	31.36	32.27	0.00591118	yes
Gstp3	0.61	0.97	1.64	0	0.00593352	yes
Rnf145	18.64	15.93	14.52	14.26	0.00595963	yes
Tmem266	0.19	0.3	0.21	0.58	0.00597104	yes
Rnasel	4.01	4.94	2.35	2.21	0.00597276	yes
Wfdc3	5.48	0.51	2.09	0	0.00602634	yes
Eif4enif1	7.11	7.04	8.48	9.47	0.00604637	yes
Anxa5	67.91	67.16	57.54	31.74	0.00605037	yes
Tmem163	0.25	0.29	0.54	0.78	0.00607008	yes
Tradd	8.11	6.52	8	8.41	0.00609701	yes
Garnl3	0.25	0.18	0.36	0.45	0.00615408	yes
Ltbr	25.79	24.37	29.91	27.28	0.00618077	yes
Ctnna2	0.03	0.06	0.18	0.17	0.00618688	yes
Oip5	0.47	0.53	0	0	0.00623656	yes
Rin2	14.45	7.08	7.36	8.12	0.00627077	yes
Il17rd	2.23	2.15	1.15	2.56	0.00627704	yes
Btg2	78.91	51.8	62.87	57.78	0.00628226	yes
Arpc5	19.71	17.73	16.46	27.17	0.00630775	yes
Spaca4	1.43	0.62	1.21	4.76	0.00630775	yes
Sptlc2	18.81	18.89	8.86	8.66	0.00638152	yes
D130040H23Rik	1.67	1.41	0.56	0.64	0.0063836	yes
Dgkh	2.33	1.44	0.55	1.25	0.00640486	yes
Dok1	4.81	3.88	3.56	4.96	0.00643548	yes
Arhgef7	3.95	3.77	4.2	4.22	0.00645676	yes
Amot	13.15	11.08	8.06	3.83	0.00648788	yes
Memo1	5.61	4.34	2.29	2.61	0.00649354	yes
2410002F23Rik;Gm15517	2.74	2.75	5.28	6.66	0.00650436	yes
Pkd2	3.97	4.76	4.57	5.47	0.0065342	yes
Parp11	2.48	2.65	1.17	3.67	0.00656654	yes
Cnpy1	0.01	0.12	0	0.22	0.00656888	yes
Thy1	6.52	13.39	12.01	15.06	0.0065938	yes
Npr1	0.63	1.17	0.59	0.76	0.00661095	yes
2010111I01Rik	2.94	2.11	2.71	5.89	0.00661918	yes
Cyth1	8.52	7.44	9.74	4.95	0.00665981	yes
Lrriq1	0.05	0.03	0.19	0.28	0.00668661	yes
Jpt1	12.96	9.37	13.94	11.66	0.00672804	yes
Cd274	1.28	1.48	2.39	3.79	0.0067385	yes
Spag1	0.29	0.28	0.21	0.73	0.00677884	yes
Rgs4	4.41	2.09	0.64	1.48	0.00677891	yes
Sema4g	3.06	3.95	5.94	11.62	0.00677919	yes
Ssr4	23.57	24.59	14.15	10.02	0.00679327	yes
Akt3	1.99	2.83	1.72	1.5	0.00682966	yes
Cep295nl	0.94	0.76	1.3	5.39	0.00683465	yes
Ssbp4	4.63	4.67	7.99	10.02	0.00684078	yes
Sema4d	5.43	5.73	5.81	5.34	0.00685123	yes
Cyp2c68	0.36	1.19	1.02	0	0.0069589	yes
Ppargc1b	1.31	1.8	1.07	3.11	0.00698635	yes
Crygc	1.96	1.16	0	0	0.00701466	yes
Vangl2	1.3	1.62	1.64	1.44	0.00702843	yes
Rasa2	3.77	3.09	2.11	2.85	0.00702843	yes
Fanci	0.73	0.53	0.14	1.1	0.00705754	yes
Tifa	5.06	3.71	2.41	1.92	0.00710144	yes
Elf4	6.83	8.45	4.15	2.35	0.00710144	yes
Kmt5c	3.93	3.24	3.85	15.13	0.00711258	yes
Hist1h1b	14.31	22.35	18.15	12.44	0.00712162	yes
Upk3b	0.09	0.07	1.34	0	0.00712891	yes
Chga	0.03	0.78	3.31	0.66	0.0071436	yes
Rin3	3.04	2.58	1.76	2.37	0.00714633	yes
Pla2g4f	4.41	3.28	2.92	3.05	0.00717327	yes
Smox	4.69	4.39	6.53	8.75	0.00717759	yes
Ptprj	31.06	29.69	25.17	15.3	0.00719011	yes
9530003J23Rik	40.84	186.7	1.45	1.37	0.00720786	yes
F2rl1	26.05	14.37	11.62	7.94	0.00722075	yes
Plekha4	0.53	0.48	0.62	0.8	0.00722662	yes
Rgs5	8.11	11.52	8.81	7.14	0.00722716	yes
Htra3	1.36	2.76	3.12	5.3	0.00723735	yes
Creg1	18.9	16.36	17.58	7.61	0.00723735	yes
Ehd4	28.95	24.07	24.15	19.56	0.00724878	yes
Mon1b;Syce1l	9.21	9.17	8.58	7.29	0.00727374	yes
Cdk6	4.84	8.93	6	5.59	0.00729488	yes
Tspan7	7.78	6.88	2.72	2.42	0.00729488	yes
Rassf6	5.75	2.89	4.54	2.35	0.00739363	yes
Tnr	0.02	0.05	0.05	0.2	0.00744594	yes
Rab31	17.5	13.32	9.9	10.78	0.00747017	yes
D930020B18Rik	0.14	0.04	0	0	0.00747921	yes
Gm9008	0.05	0.07	0.04	0.24	0.00747921	yes
Kctd10	17.26	17.03	11.96	13.72	0.0074995	yes
Aadacl3	0	0.02	0.85	0.24	0.0074995	yes
Mill2	1.72	1.84	1.52	2.58	0.00750879	yes
Suds3	4.96	3.95	7.79	9.75	0.00751536	yes
Vdr	2.79	3.12	3.51	7.62	0.00751651	yes
Gm5114	0.08	0	0	0	0.00758053	yes
Plch1	5.29	5.59	3.81	3.23	0.00758069	yes
Nek8	1.05	1.17	2.46	2.85	0.00762043	yes
Ptger4	1.98	3.11	1.85	2.59	0.00763469	yes
Tnfaip8l1	0.36	0.39	0.59	0.26	0.00764646	yes
Sh3kbp1	2.38	3.14	4.82	2.13	0.00764646	yes
Grpel2	5.05	4.82	2.98	5.63	0.00768596	yes
Comtd1	2.24	2.08	2.86	2.9	0.00770408	yes
Cat	30.71	27.84	31.08	23.58	0.00774494	yes
Ctsl	24.2	22.61	17.29	15.2	0.00775974	yes
Vps37b	15.03	18.14	13.44	16.25	0.00776738	yes
Mboat2	2.65	1.92	3.13	2.3	0.00781196	yes
Actn3	0.18	0.17	0.06	0.18	0.00785537	yes
Mgmt	0.92	0.84	1.12	1.4	0.00790006	yes
Ppcs	13.3	9.93	8.2	7.77	0.00790258	yes
Acvrl1	2.73	4.48	3.36	3.37	0.00792885	yes
Sp5	0.61	0.56	0.8	0.31	0.00794377	yes
Fam129a	16.82	14.62	11.23	7.7	0.00794764	yes
Six1	8.82	4.87	10.38	7.36	0.00802168	yes
Glb1l2	4.23	6.02	1.65	1.46	0.00802474	yes
Ptprn	0.34	0.73	0.94	2.24	0.00804753	yes
Dusp10	10.02	5.16	4.29	4.6	0.00807786	yes
Omp	2.34	2.33	2.08	7.61	0.00812353	yes
Irx5	2.15	2.81	4.87	3.47	0.00821483	yes
Golt1a;Gm28040;Kiss1	0.93	1.11	0.45	0.46	0.00823204	yes
Hcls1	2.95	2.55	3.85	3.7	0.00829721	yes
AW011738;Perm1	1.84	1.6	0.61	1.73	0.0082978	yes
Ikbke	1.43	1.98	2.29	4.67	0.00838555	yes
Cldn8	38.26	43.35	25	12.32	0.00842247	yes
Igsf11	1.4	2.38	0.97	1.61	0.00842738	yes
Bok	8.41	3.63	8.49	5.96	0.00844076	yes
Tmem45b	12.52	18.95	14.25	13.15	0.00853649	yes
Lrrc7	0.06	0.04	0.52	0.41	0.00856812	yes
Gm14295	1.13	1.5	0.73	0.32	0.00861032	yes
Tmem117	6.6	3.24	2.33	3.9	0.00862446	yes
Dsg2	20.17	25.43	15.67	10.92	0.00863703	yes
Ptprh	0.44	0.54	0.31	0.35	0.00865461	yes
Dhtkd1	1.23	1.33	1.4	2.11	0.00865969	yes
Amer2	0.05	0.12	0.34	0.15	0.0086733	yes
Stat2	11.97	8.04	7.81	17.33	0.0086733	yes
Ikzf2	8.28	8.61	5.01	8.39	0.00868302	yes
Sipa1	1.89	2.22	3.67	5	0.00878299	yes
Tacr2	0.02	0.08	0	0	0.00878398	yes
Ticrr	0.22	0.22	0.28	0.29	0.00879897	yes
Prkch	6.17	6.22	2.62	4.27	0.0088487	yes
Cebpd	6.88	4.3	8.58	8.1	0.00894632	yes
Tspan32	0.29	0.21	0.2	0.29	0.00898211	yes
Mrgpra4	0.03	0	0.03	0	0.00902046	yes
Git1	10.26	9.28	16.97	19.51	0.00903271	yes
Tnks1bp1	20.47	20.91	16.51	20.82	0.0090415	yes
Arhgef6	1.27	1.48	1.22	2.1	0.00907121	yes
Sowahb	8.95	7	7.39	8.21	0.00912174	yes
Gapdh	5.87	5.25	13.01	2.16	0.00916013	yes
Gimap3	1.01	1.31	0.71	8.1	0.00917299	yes
Col11a2	0.08	0.1	0.37	0.63	0.00918872	yes
Plac9a	1.43	1.96	1.5	1.86	0.0092994	yes
Nfkb1	6.86	5.78	5	7.94	0.00930342	yes
Dcxr	81.76	66.69	86.1	74.66	0.00930342	yes
Gm10645	0.22	0.78	0	1.99	0.00931328	yes
Plekha6	12.93	14.01	16.45	27.48	0.00931589	yes
Fosb	0.3	0.42	0.43	1.13	0.00932656	yes
Litaf	12.94	9.27	7.8	4.2	0.00936708	yes
Gpr171	0.45	0.75	0.71	3.06	0.00939805	yes
Gja1	2.93	2.75	0.95	2.24	0.0094726	yes
Sqle	13.24	9.48	4.82	4.24	0.00948618	yes
Spin2c	0.47	0.45	0	0	0.00949639	yes
Ormdl3	34.39	27.29	25.05	16.26	0.00954267	yes
Bsg	298.05	330.47	281.77	259.57	0.00956645	yes
Aspm	0.42	0.62	0.61	0.15	0.00960823	yes
Gsr	28.28	26.87	23.89	18.28	0.00965116	yes
Pla2g16	8.13	7.64	7.64	7.28	0.0097204	yes
Fzd1	15.53	19.94	13.42	27.52	0.00973989	yes
Rps28	23.08	18.99	14.05	11.88	0.00975835	yes
Sptb	2.3	1.86	3.64	3.18	0.00977912	yes
Wdr1	38.91	36.71	26.7	25.87	0.00977912	yes
Adk	3.2	2.46	1.63	1.28	0.00979901	yes
Tbxas1	0.56	0.45	0.41	1.65	0.00980747	yes
Syt10	0.1	0.27	0	1.49	0.00984338	yes
Arhgap30	0.98	1.01	0.78	1.11	0.00986257	yes
Nrros	1.64	1.65	1.01	3	0.00991604	yes
Per3	2.74	3.52	3.65	9.16	0.00993346	yes
Paip2b	12.68	10.09	5.41	4.02	0.00993346	yes
Yars	6.69	6.47	4.9	4.39	0.00994776	yes
Brca1	0.68	0.77	0.38	1.2	0.00997614	yes
Pcdhgc4;Pcdhga7;Pcdhgb2;Pcdhgb1;Pcdhga4;Pcdhga5;Pcdhga2;Pcdhga1;Pcdhga6;Pcdhga8;Pcdhga3;Pcdhgb4;Pcdhgb7;Pcdhgc3;Pcdhgb6;Pcdhga10;Pcdhga11;Pcdhac1;Gm37388;Pcdhga9;Pcdha7;Pcdha11;Gm37013;Pcdhgc5;Pcdhgb5;Pcdha4;Pcdha6;Pcdha2;Pcdha12;Pcdhga12;Pcdha8;Pcdha9;Gm42416;Pcdha3;Pcdhac2;Pcdha5;Pcdha1;Pcdhgb8	0.81	0.87	0.87	1.33	0.00999246	yes
Otol1	0	0	3.23	0	0.0100164	yes
Rhoh	0.17	0.13	0.27	0.37	0.0100517	yes
Crispld1	0.19	0.57	0	0	0.0100557	yes
Sptbn2	7.24	7	8.5	7.53	0.0100751	yes
[truncated: 826 more rows]
